# Supplementary material for: NMR-based quantitative studies of the conformational equilibrium between their square and folded forms of ascidiacyclamide and its analogues
Source: Royal Society of Chemistry journal article supplement (doi:10.1039/d0ra07396b), 2020-01-01
Supplement: d0ra07396b1.pdf [file d0ra07396b1.pdf]

## Electronic supporting information for

“NMR-based quantitative studies of the conformational equilibrium between their square and folded forms of ascidiacyclamide and its analogues”

Akiko Asano\*, Katsuhiko Minoura, Yuki Kojima, Taishi Yoshii, Ryoya Ito, Takeshi Yamada, Takuma Kato  
and Mitsunobu Doi

*Osaka University of Pharmaceutical Sciences, 4-20-1 Nasahara, Takatsuki, Osaka 569-1094, Japan.*

### Contents:

|                                                                              |                |
|------------------------------------------------------------------------------|----------------|
| Synthesis and characterization of the peptides <b>8-12</b> .....             | Page 2-6       |
| <sup>1</sup> H NMR spectra for peptides <b>8-12</b> .....                    | Page 7-21      |
| HPLC analyses for peptides <b>8-12</b> .....                                 | Page 22        |
| Crystallographic data for peptides <b>10-12</b> .....                        | Page 23        |
| VT-NMR data for peptides <b>1-12</b> , T3ASC and <i>d</i> ASC .....          | Page 24-<br>37 |
| Thermodynamic parameters and van't Hoff plots for peptides <b>1-12</b> ..... | Page 38-48     |
| CD spectral changes by TFE titration for peptides <b>2-7</b> .....           | Page 49        |
| CD spectral changes by increasing temperature for peptides <b>2-7</b> .....  | Page 50        |
| Superimposition of the X-ray structures of peptide <b>1</b> and T3ASC.....   | Page 51        |
| The X-ray structure of <i>d</i> ASC.....                                     | Page 52        |

## Synthesis and characterization of the peptides 8-12

### General Experimental Methods

Pure products were obtained after liquid chromatography using Merck silica gel 60 (40-63  $\mu\text{m}$ ). Analytical thin-layer chromatography was carried out on Merck silica gel F<sub>254</sub> plates with the following solvent system (v/v); chloroform : methanol : acetic acid (95 : 10 : 3). The plates were visualized with UV light ( $\lambda = 254 \text{ nm}$ ) and revealed with a 5 % solution of ninhydrin in ethanol. Melting points were determined on a Yanagimoto micro-melting point apparatus (YANAKO Measuring Instrument Trading Co., Kyoto, Japan). <sup>1</sup>H NMR spectra were recorded on an Agilent DD2 600-MHz NMR spectrometer (Agilent Technologies, California, USA). Peptide concentrations were about 5.0 mM in CD<sub>3</sub>CN. Chemical shifts were measured relative to internal trimethylsilane at 0.00 ppm. The protons were assigned using two dimensional correlated spectroscopy (2D-COSY) and rotating-frame Overhauser effect spectroscopy (ROESY; mixing time = 500 ms). High-resolution mass spectra (HR-MS) were obtained using FAB mass spectrometry on a JMS-700 mass spectrometer (JEOL LTD., Tokyo, Japan).

### Synthesis of Boc-D-Val(Thz)-OMe

Boc-D-Val(Thz)-OMe was prepared according to previous report (Y. Hamada *et. al.*, *J. Org. Chem.* 1987, **52**, 1252-1255) (Scheme S1). N-(*tert*-butoxycarbonyl)-D-valine (Boc-D-Val-OH) was first converted to the corresponding methyl ester by using methyl iodide in the presence of potassium hydrogen carbonate in N, N-dimethylformamide (DMF) at room temperature. The methyl ester was reduced with lithium chloride-sodium borohydride in tetrahydrofuran (THF) to give the amino alcohol derivative. Oxidation of the amino alcohol derivative was conveniently accomplished by the dimethyl sulfoxide (DMSO) oxidation using sulfur trioxide-pyridine complex (Py·SO<sub>3</sub>) in the presence of trimethylamine (Et<sub>3</sub>N), giving the amino aldehyde derivative. Condensation of the amino aldehyde derivative with L-cysteine methyl ester (H-L-Cys-OMe) afforded the thiazolidine derivative as a mixture of C-2 epimers. Oxidation of the thiazolidine derivative to the Boc-D-Val(Thz)-OMe was performed with activated manganese dioxide (Sigma-Aldrich Co. Llc., St. Louis, USA) in benzene.

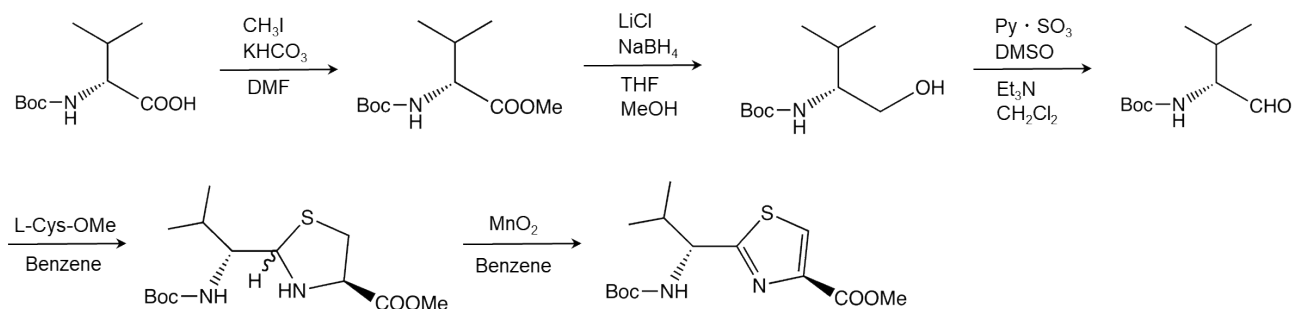

**Scheme S1**

### General procedure for the condensation

Peptides were synthesized by a conventional liquid-phase method according to Scheme S2. The linear peptide were synthesized using 1-hydroxy-benzotriazole (HOBt) (Watanabe Chemical Ind. Ltd., Hiroshima, Japan) and 1-ethyl-3-(3-dimethylaminopropyl)carbodiimide hydrochloride (EDC·HCl) (Watanabe Chemical Ind. Ltd., Hiroshima, Japan), and cyclization was conducted with benzotriazolyl-oxy-tris(pyrrolidino)-phosphonium hexafluorophosphate (PyBOP) (Watanabe Chemical Ind. Ltd., Hiroshima, Japan) in the presence of 4-dimethylaminopyridine (DMAP) (Nacalaitesque, Kyoto, Japan).

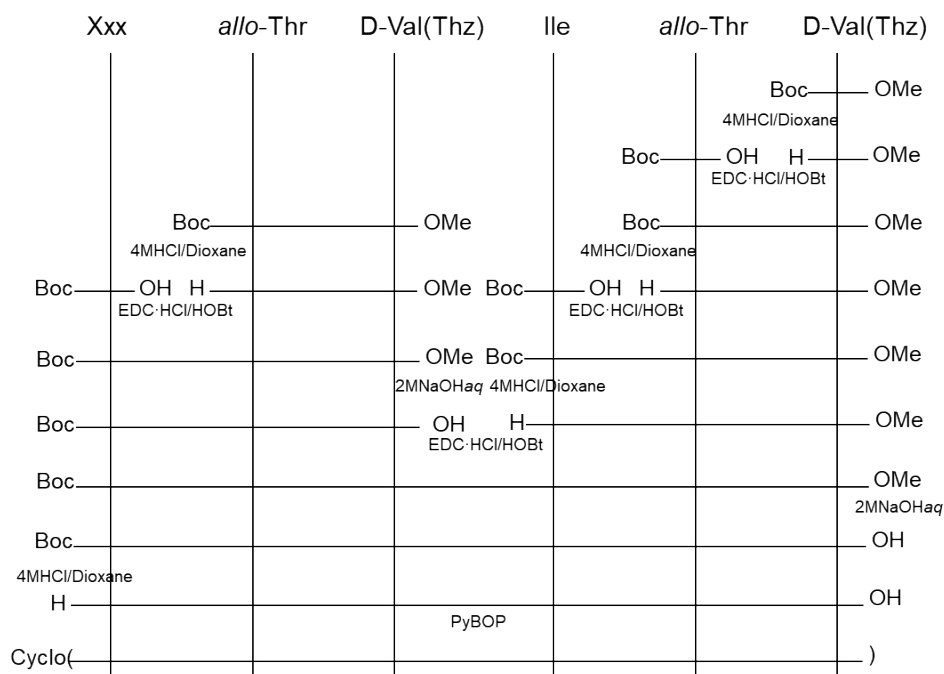

Xxx = Abu (8), Nva (9), Tbu (10), Chg (11), Tle (12)

**Scheme S2**

## Synthesis of oxazoline rings

The oxazoline (Oxz) rings were formed by reacting the Ile-*allo*-Thr moiety with bis(2-methoxyethyl)aminosulfur trifluoride (Deoxo-Fluor) (Fujifilm Wako Pure Chemical, Osaka, Japan) according to previous report (A. J. Phillips *et. al.*, *Org. Lett.* 2000, **2**, 1165-1168) (Scheme S3).

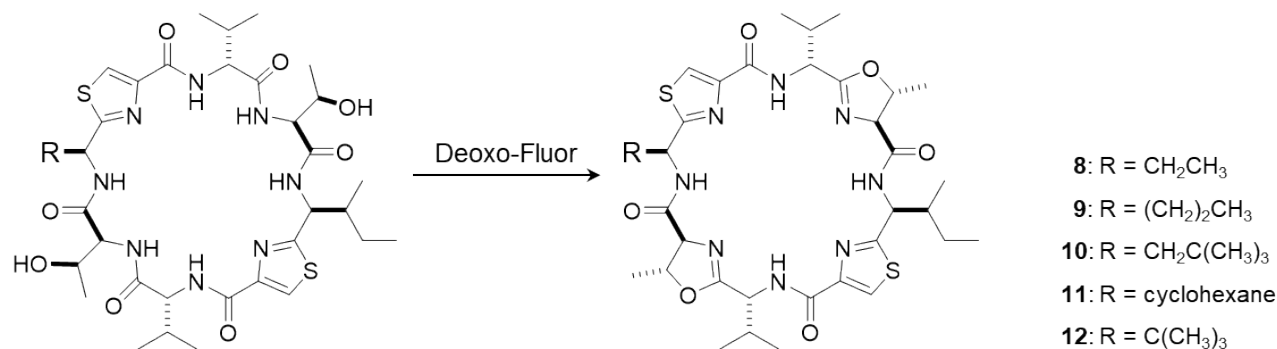

Scheme S3

## Characterization of peptide 8

$R_f = 0.72$ . Mp. 115–118 °C. HR-FAB MS (matrix: Glycerol) calcd for [C<sub>34</sub>H<sub>48</sub>N<sub>8</sub>O<sub>6</sub>S<sub>2</sub> + H]<sup>+</sup> = 729.3211, found  $m/z$  729.3215. <sup>1</sup>H NMR (600 MHz, CD<sub>3</sub>CN, 298 K)  $\delta$  = 7.82 (d, 1H, NH Abu<sup>1</sup>, J = 6.6 Hz); 7.75 (d, 1H, NH Ile<sup>5</sup>, J = 7.8 Hz); 7.68 (s, 2H, H Thz<sup>4,8</sup>); 7.22 (d, 1H, NH D-Val<sup>3</sup>, J = 10.2 Hz); 7.14 (d, 1H, NH D-Val<sup>7</sup>, J = 10.2); 5.16 (dd, 1H,  $\alpha$ H D-Val<sup>3</sup>, J = 10.2, 6.6 Hz); 5.13 (dd, 1H,  $\alpha$ H D-Val<sup>7</sup>, J = 10.2, 6.6 Hz); 4.87 (qd, 1H,  $\beta$ H Oxz<sup>6</sup>, J = 6.6, 4.8); 4.78 (qd, 1H,  $\beta$ H Oxz<sup>2</sup>, J = 6.0, 4.5); 4.71 (q, 1H,  $\alpha$ H Abu<sup>1</sup>, J = 6.6 Hz); 4.64 (t, 1H,  $\alpha$ H Ile<sup>5</sup>, J = 7.8 Hz); 4.30 (dd, 1H,  $\alpha$ H Oxz<sup>2</sup>, J = 4.5, 0.6 Hz); 4.29 (dd, 1H,  $\alpha$ H Oxz<sup>6</sup>, J = 4.8, 0.6 Hz); 2.34 (oct., 2H,  $\beta$ H D-Val<sup>3,7</sup>, J = 6.6 Hz); 2.05 (m, 1H,  $\beta$ H Ile<sup>5</sup>); 1.41 (d, 3H,  $\gamma$ H Oxz<sup>6</sup>, J = 6.6 Hz); 1.40 (d, 3H,  $\gamma$ H Oxz<sup>2</sup>, J = 6.0 Hz); 1.40 (m, 1H,  $\gamma$ <sup>12</sup>H Ile<sup>5</sup>); 1.20 (m, 1H,  $\gamma$ <sup>13</sup>H Ile<sup>5</sup>); 1.12 (d, 3H,  $\gamma$ <sup>1</sup>H D-Val<sup>3</sup>, J = 6.6 Hz); 1.11 (d, 3H,  $\gamma$ <sup>1</sup>H D-Val<sup>7</sup>, J = 6.6 Hz); 1.05 (d, 6H,  $\gamma$ <sup>2</sup>H D-Val<sup>3,7</sup>, J = 6.6 Hz); 0.83 (d, 3H,  $\gamma$ <sup>2</sup>H Ile<sup>5</sup>, J = 6.6 Hz); 0.78 (t, 3H,  $\gamma$ H Abu<sup>1</sup>, J = 7.2 Hz); 0.77 (t, 3H,  $\delta$ H Ile<sup>5</sup>, J = 7.2 Hz).

### Characterization of peptide 9

$R_f = 0.71$ . Mp. 201–202 °C. HR-FAB MS (matrix: Glycerol) calcd for  $[C_{35}H_{50}N_8O_6S_2 + H]^+$  = 743.3367, found  $m/z$  743.3378.  $^1H$  NMR (600 MHz,  $CD_3CN$ , 298 K)  $\delta = 7.84$  (d, 1H, NH Nva<sup>1</sup>,  $J = 7.2$  Hz); 7.79 (d, 1H, NH Ile<sup>5</sup>,  $J = 7.8$  Hz); 7.71 (s, 1H, H Thz<sup>4or8</sup>); 7.70 (s, 1H, H Thz<sup>4or8</sup>); 7.23 (d, 1H, NH D-Val<sup>3or7</sup>,  $J = 10.2$  Hz); 7.16 (d, 1H, NH D-Val<sup>3or7</sup>,  $J = 10.2$ ); 5.15 (dd, 1H,  $\alpha H$  D-Val<sup>3or7</sup>,  $J = 10.2, 5.4$  Hz); 5.13 (dd, 1H,  $\alpha H$  D-Val<sup>3or7</sup>,  $J = 10.2, 5.4$  Hz); 4.85 (qd, 1H,  $\beta H$  Oxz<sup>6</sup>,  $J = 6.6, 4.5$ ); 4.80 (qd, 1H,  $\beta H$  Oxz<sup>2</sup>,  $J = 6.0, 4.5$ ); 4.76 (q, 1H,  $\alpha H$  Nva<sup>1</sup>,  $J = 7.2$  Hz); 4.65 (t, 1H,  $\alpha H$  Ile<sup>5</sup>,  $J = 7.8$  Hz); 4.30 (d, 2H,  $\alpha H$  Oxz<sup>2,6</sup>,  $J = 4.5$  Hz); 2.35 (m, 1H,  $\beta H$  D-Val<sup>3or7</sup>); 2.33 (m, 1H,  $\beta H$  D-Val<sup>3or7</sup>); 2.03 (m, 1H,  $\beta H$  Ile<sup>5</sup>); 1.92 (m, 1H,  $\beta^{12}H$  Nva<sup>1</sup>); 1.72 (m, 1H,  $\beta^{13}H$  Nva<sup>1</sup>); 1.42 (d, 3H,  $\gamma H$  Oxz<sup>6</sup>,  $J = 6.0$  Hz); 1.40 (d, 3H,  $\gamma H$  Oxz<sup>2</sup>,  $J = 6.0$  Hz); 1.40 (m, 3H,  $\gamma^{12}H$  Ile<sup>5</sup>); 1.27 (m, 1H,  $\gamma^{12}H$  Nva<sup>1</sup>); 1.19 (m, 1H,  $\gamma^{13}H$  Ile<sup>5</sup>); 1.11 (d, 3H,  $\gamma^1H$  D-Val<sup>3or7</sup>,  $J = 6.0$  Hz); 1.10 (d, 3H,  $\gamma^2H$  D-Val<sup>3or7</sup>,  $J = 6.0$  Hz); 1.10 (m, 1H,  $\gamma^{13}H$  Nva<sup>1</sup>); 1.04 (d, 6H,  $\gamma^2H$  D-Val<sup>3,7</sup>,  $J = 6.0$  Hz); 0.82 (d, 3H,  $\gamma^2H$  Ile<sup>5</sup>,  $J = 6.6$  Hz); 0.79 (t, 3H,  $\delta H$  Nva<sup>1</sup>,  $J = 6.6$  Hz); 0.77 (t, 3H,  $\delta H$  Ile<sup>5</sup>,  $J = 7.2$  Hz).

### Characterization of peptide 10

$R_f = 0.61$ . Mp. 205–208 °C. HR-FAB MS (matrix: Glycerol) calcd for  $[C_{37}H_{54}N_8O_6S_2 + H]^+$  = 771.3680, found  $m/z$  771.3688.  $^1H$  NMR (600 MHz,  $CD_3CN$ , 298 K)  $\delta = 7.61$  (d, 1H, NH Tbu<sup>1</sup>,  $J = 7.2$  Hz); 7.52 (d, 1H, NH Ile<sup>5</sup>,  $J = 7.8$  Hz); 7.53 (s, 2H, H Thz<sup>4,8</sup>); 7.17 (d, 1H, NH D-Val<sup>3</sup>,  $J = 10.8$  Hz); 7.08 (d, 1H, NH D-Val<sup>7</sup>,  $J = 10.2$ ); 5.15 (dd, 1H,  $\alpha H$  D-Val<sup>3</sup>,  $J = 10.8, 3.6$  Hz); 5.13 (dd, 1H,  $\alpha H$  D-Val<sup>7</sup>,  $J = 10.2, 3.6$  Hz); 4.92 (qd, 1H,  $\beta H$  Oxz<sup>6</sup>,  $J = 6.6, 3.6$ ); 4.89 (ddd, 1H,  $\alpha H$  Tbu<sup>1</sup>,  $J = 9.6, 7.2, 4.2$  Hz); 4.81 (qd, 1H,  $\beta H$  Oxz<sup>2</sup>,  $J = 6.6, 3.6$ ); 4.60 (dd, 1H,  $\alpha H$  Ile<sup>5</sup>,  $J = 10.8, 7.8$  Hz); 4.32 (d, 1H,  $\alpha H$  Oxz<sup>6</sup>,  $J = 3.6$  Hz); 4.31 (d, 1H,  $\alpha H$  Oxz<sup>2</sup>,  $J = 3.6$  Hz); 2.37 (sept.d, 1H,  $\beta H$  D-Val<sup>3</sup>,  $J = 6.6, 3.6$  Hz); 2.36 (sept.d, 1H,  $\beta H$  D-Val<sup>7</sup>,  $J = 6.6, 3.6$  Hz); 2.23 (m, 1H,  $\beta H$  Ile<sup>5</sup>); 2.12 (dd, 1H,  $\beta^{12}H$  Tbu<sup>1</sup>,  $J = 13.8, 9.6$  Hz); 1.63 (dd, 1H,  $\beta^{13}H$  Tbu<sup>1</sup>,  $J = 13.8, 4.2$  Hz); 1.58 (m, 1H,  $\gamma^{12}H$  Ile<sup>5</sup>); 1.44 (d, 3H,  $\gamma H$  Oxz<sup>6</sup>,  $J = 6.6$  Hz); 1.41 (d, 3H,  $\gamma H$  Oxz<sup>2</sup>,  $J = 6.6$  Hz); 1.32 (m, 1H,  $\gamma^{13}H$  Ile<sup>5</sup>); 1.12 (d, 3H,  $\gamma^1H$  D-Val<sup>3</sup>,  $J = 6.6$  Hz); 1.09 (d, 9H,  $\gamma^1H$  D-Val<sup>7</sup>,  $\gamma^2H$  D-Val<sup>3,7</sup>,  $J = 6.6$  Hz); 0.98 (d, 3H,  $\gamma^2H$  Ile<sup>5</sup>,  $J = 5.4$  Hz); 0.97 (s, 9H,  $\delta H$  Tbu<sup>1</sup>); 0.85 (t, 3H,  $\delta H$  Ile<sup>5</sup>,  $J = 7.2$  Hz).

### Characterization of peptide 11

$R_f = 0.72$ . Mp. 283–284 °C. HR-FAB MS (matrix: Glycerol) calcd for  $[C_{38}H_{54}N_8O_6S_2 + H]^+$  = 783.3680, found  $m/z$  783.3681.  $^1H$  NMR (600 MHz,  $CD_3CN$ , 298 K)  $\delta = 8.01$  (d, 1H, NH Ile<sup>5</sup>,  $J = 7.8$  Hz); 7.92 (d, 1H, NH Chg<sup>1</sup>,  $J = 7.8$  Hz); 7.85 (s, 2H, H Thz<sup>4,8</sup>); 7.26 (d, 1H, NH D-Val<sup>3or7</sup>,  $J = 9.6$  Hz); 7.25 (d, 1H, NH D-Val<sup>3or7</sup>,  $J = 10.2$ ); 5.15 (dd, 1H,  $\alpha H$  D-Val<sup>3or7</sup>,  $J = 9.6, 6.6$  Hz); 5.14 (dd, 1H,  $\alpha H$  D-Val<sup>3or7</sup>,  $J = 10.2, 6.6$  Hz); 4.81 (quint., 2H,  $\beta H$  Oxz<sup>2,6</sup>,  $J = 6.0$ ); 4.69 (ddd, 1H,  $\alpha H$  Ile<sup>5</sup>,  $J = 7.8,$

5.4, 1.2); 4.63 (ddd, 1H,  $\alpha$ H Chg<sup>1</sup>, J = 7.8, 5.7, 1.2 Hz); 4.28 (dd, 1H,  $\alpha$ H Oxz<sup>2or6</sup>, J = 6.0, 1.2 Hz); 4.27 (dd, 1H,  $\alpha$ H Oxz<sup>2or6</sup>, J = 6.0, 1.2 Hz); 2.30 (oct., 1H,  $\beta$ H D-Val<sup>3or7</sup>, J = 6.6 Hz); 1.94 (m, 1H,  $\beta$ H Ile<sup>5</sup>); 1.80 (m, 1H,  $\beta$ H Chg<sup>1</sup>); 1.43 (d, 3H,  $\gamma$ H Oxz<sup>2or6</sup>, J = 6.0 Hz); 1.41 (d, 3H,  $\gamma$ H Oxz<sup>2or6</sup>, J = 6.0 Hz); 1.35 (m, 1H,  $\gamma^{12}$ H Ile<sup>5</sup>); 1.19 (m, 1H,  $\gamma^{13}$ H Ile<sup>5</sup>); 1.10 (d, 6H,  $\gamma^1$ H D-Val<sup>3,7</sup>, J = 6.6 Hz); 1.00 (d, 3H,  $\gamma^2$ H D-Val<sup>3or7</sup>, J = 6.6 Hz); 0.99 (d, 3H,  $\gamma^2$ H D-Val<sup>3or7</sup>, J = 6.6 Hz); 0.76 (t, 3H,  $\delta$ H Ile<sup>5</sup>, J = 7.2 Hz); 0.72 (d, 3H,  $\gamma^2$ H Ile<sup>5</sup>, J = 7.2 Hz).

### Characterization of peptide 12

$R_f = 0.88$ . Mp. 252–253 °C. HR-FAB MS (matrix: Glycerol) calcd for  $[C_{36}H_{52}N_8O_6S_2 + H]^+$  = 757.3524, found m/z 757.3529. <sup>1</sup>H NMR (600 MHz, CD<sub>3</sub>CN, 298 K)  $\delta$  = 8.22 (d, 1H, NH Tle<sup>1</sup>, J = 9.0 Hz); 8.14 (d, 1H, NH Ile<sup>5</sup>, J = 7.8 Hz); 8.01 (s, 1H, H Thz<sup>4or8</sup>); 8.00 (s, 1H, H Thz<sup>4or8</sup>); 7.41 (d, 1H, NH D-Val<sup>7</sup>, J = 10.2 Hz); 7.40 (d, 1H, NH D-Val<sup>3</sup>, J = 9.6); 5.21 (dd, 1H,  $\alpha$ H D-Val<sup>7</sup>, J = 10.2, 7.2 Hz); 5.11 (dd, 1H,  $\alpha$ H D-Val<sup>3</sup>, J = 9.6, 7.8 Hz); 4.83 (quint., 1H,  $\beta$ H Oxz<sup>2</sup>, J = 6.0); 4.81 (quint., 1H,  $\beta$ H Oxz<sup>6</sup>, J = 6.0); 4.75 (ddd, 1H,  $\alpha$ H Ile<sup>5</sup>, J = 7.5, 3.6, 1.8 Hz); 4.48 (dd, 1H,  $\alpha$ H Tle<sup>1</sup>, J = 9.0, 1.8 Hz); 4.28 (dd, 1H,  $\alpha$ H Oxz<sup>6</sup>, J = 6.0, 1.8 Hz); 4.25 (dd, 1H,  $\alpha$ H Oxz<sup>2</sup>, J = 6.0, 1.8 Hz); 2.26 (m, 1H,  $\beta$ H D-Val<sup>3</sup>); 2.23 (m, 1H,  $\beta$ H D-Val<sup>7</sup>); 2.23 (m, 1H,  $\beta$ H Ile<sup>5</sup>); 1.82 (m, 1H,  $\beta$ H Ile<sup>5</sup>); 1.42 (d, 3H,  $\gamma$ H Oxz<sup>6</sup>, J = 6.0 Hz); 1.41 (d, 3H,  $\gamma$ H Oxz<sup>2</sup>, J = 6.0 Hz); 1.18 (m, 1H,  $\gamma^{12}$ H Ile<sup>5</sup>); 1.10 (m, 1H,  $\gamma^{13}$ H Ile<sup>5</sup>); 1.09 (d, 3H,  $\gamma^1$ H D-Val<sup>3</sup>, J = 6.6 Hz); 1.08 (d, 3H,  $\gamma^1$ H D-Val<sup>7</sup>, J = 6.6 Hz); 0.97 (d, 3H,  $\gamma^2$ H D-Val<sup>7</sup>, J = 6.6 Hz); 0.94 (d, 3H,  $\gamma^2$ H D-Val<sup>3</sup>, J = 6.6 Hz); 0.76 (s, 9H,  $\gamma$ H Tle<sup>1</sup>); 0.70 (d, 3H,  $\gamma^2$ H Ile<sup>5</sup>, J = 6.6 Hz); 0.61 (t, 3H,  $\delta$ H Ile<sup>5</sup>, J = 7.2 Hz).

# <sup>1</sup>H NMR spectra of peptides 8-12

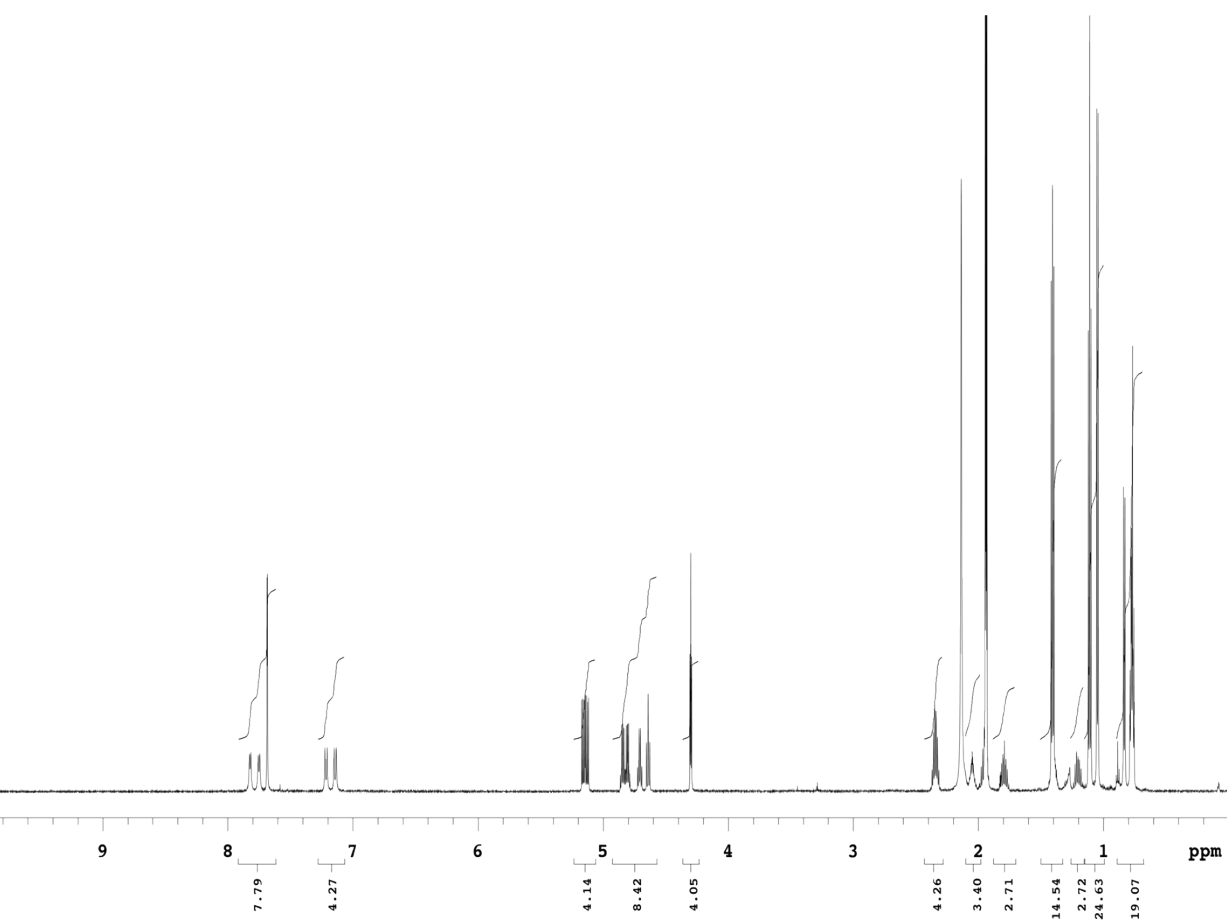

**Fig. S1** 1D <sup>1</sup>H NMR spectrum of peptide **8** in CD<sub>3</sub>CN at 298 K.

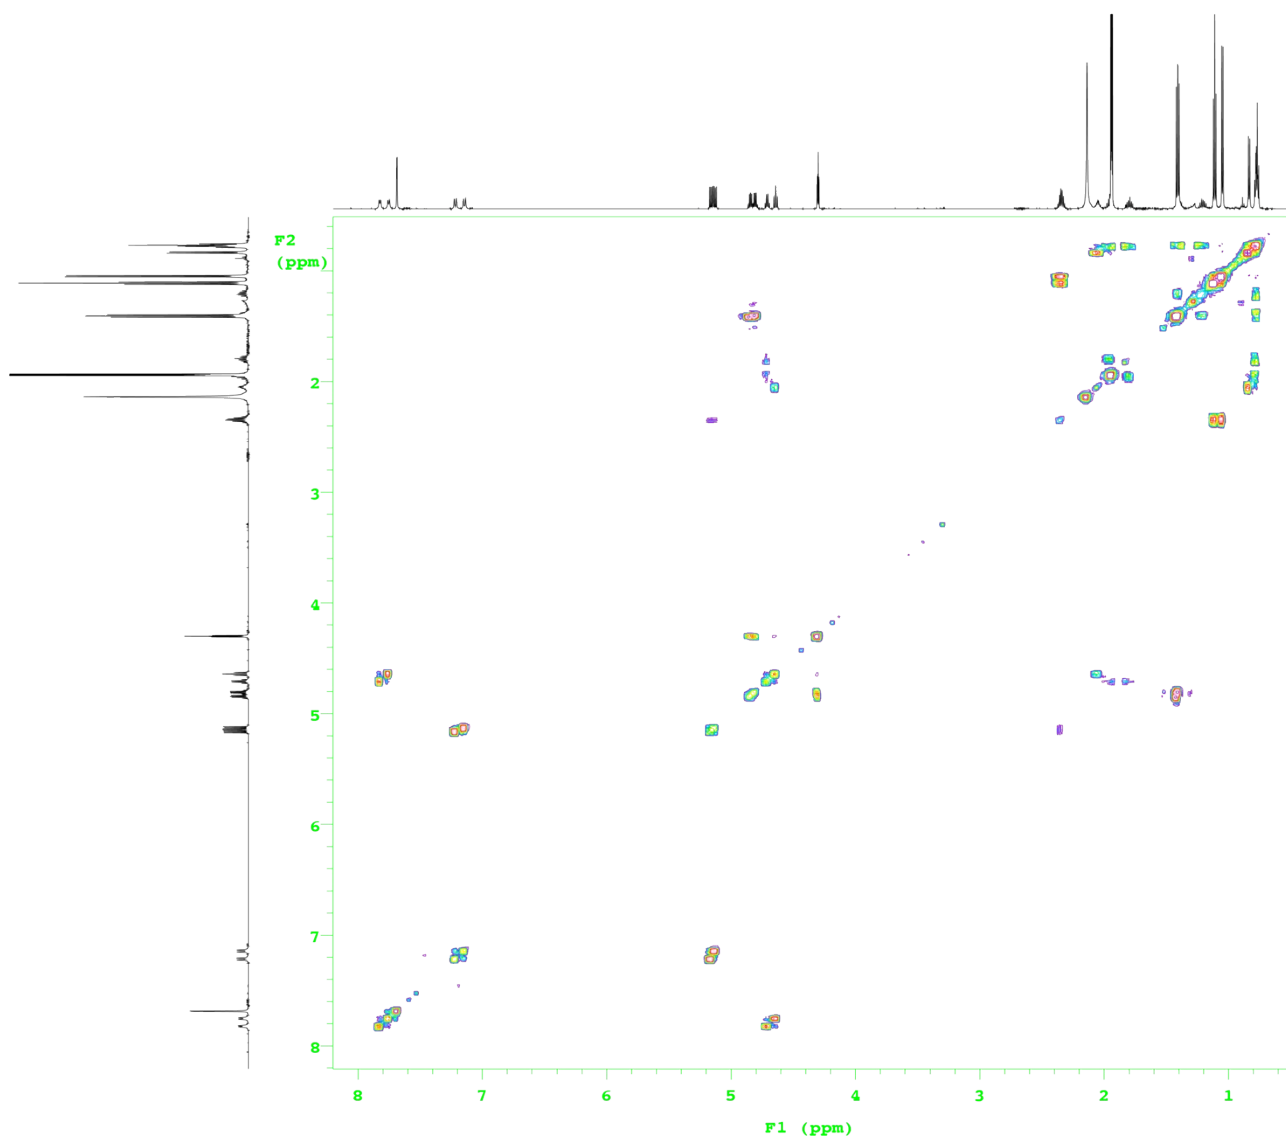

Fig. S2 2D  $^1\text{H}$ - $^1\text{H}$  COSY spectrum of peptide **8** in  $\text{CD}_3\text{CN}$  at 298 K.



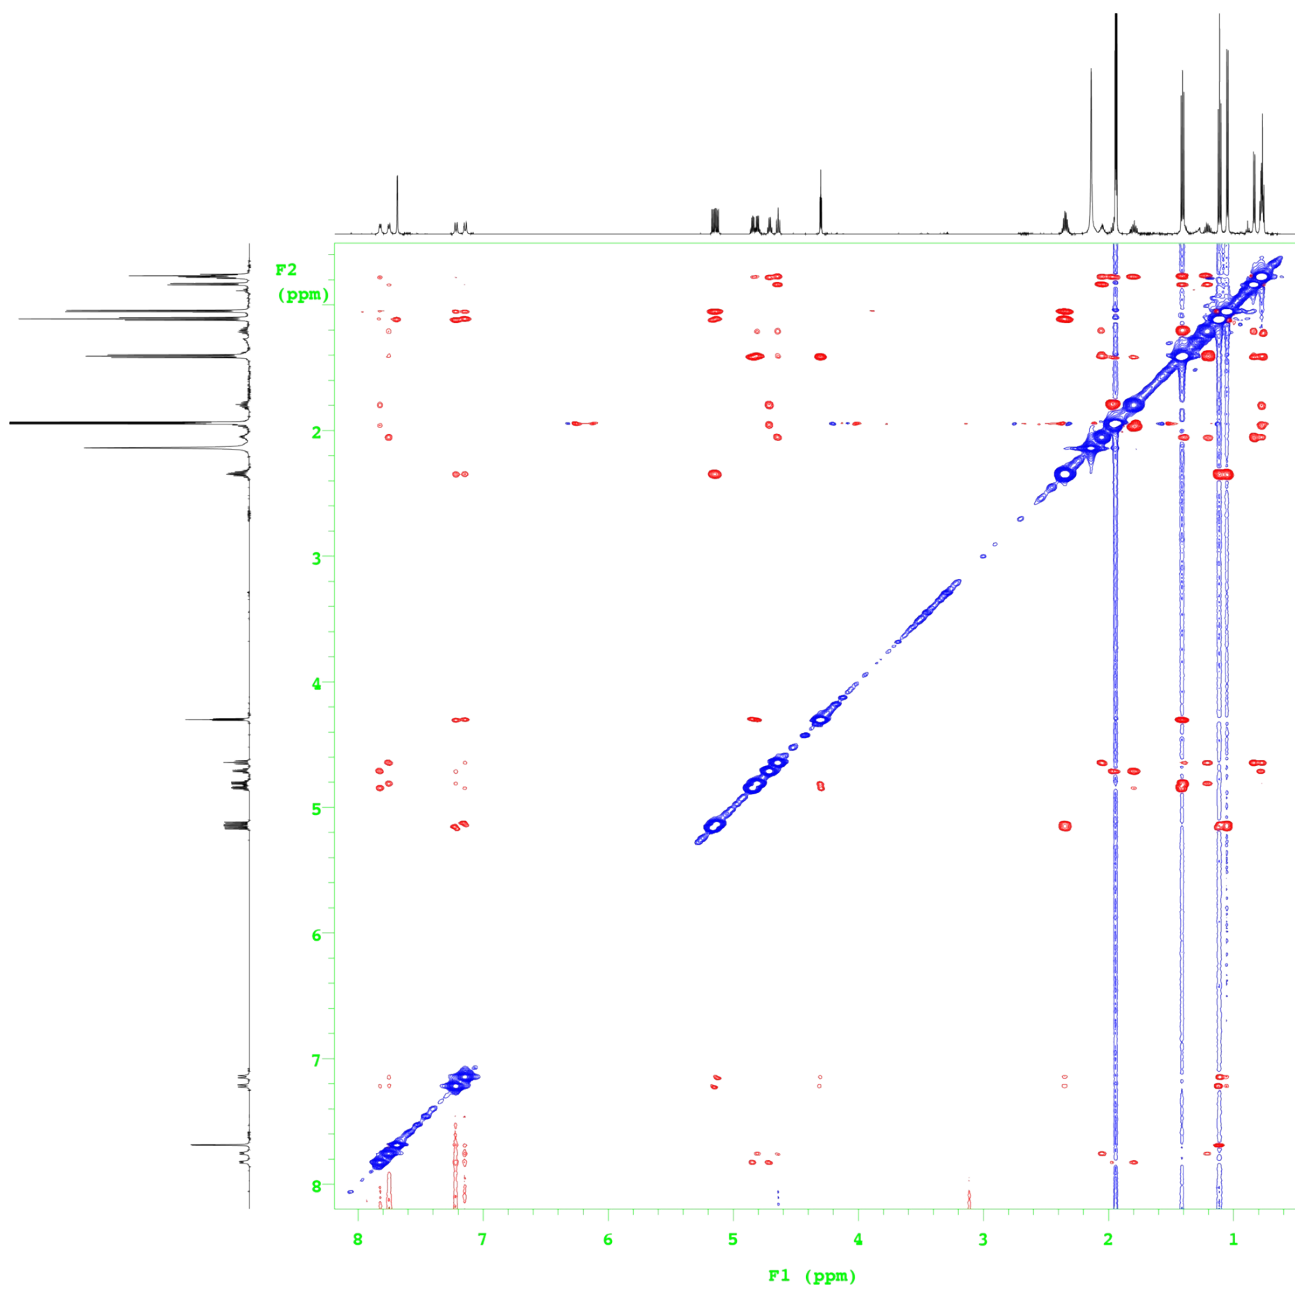

**Fig. S3** 2D  $^1\text{H}$ - $^1\text{H}$  ROESY spectrum of peptide **8** in  $\text{CD}_3\text{CN}$  at 298 K.

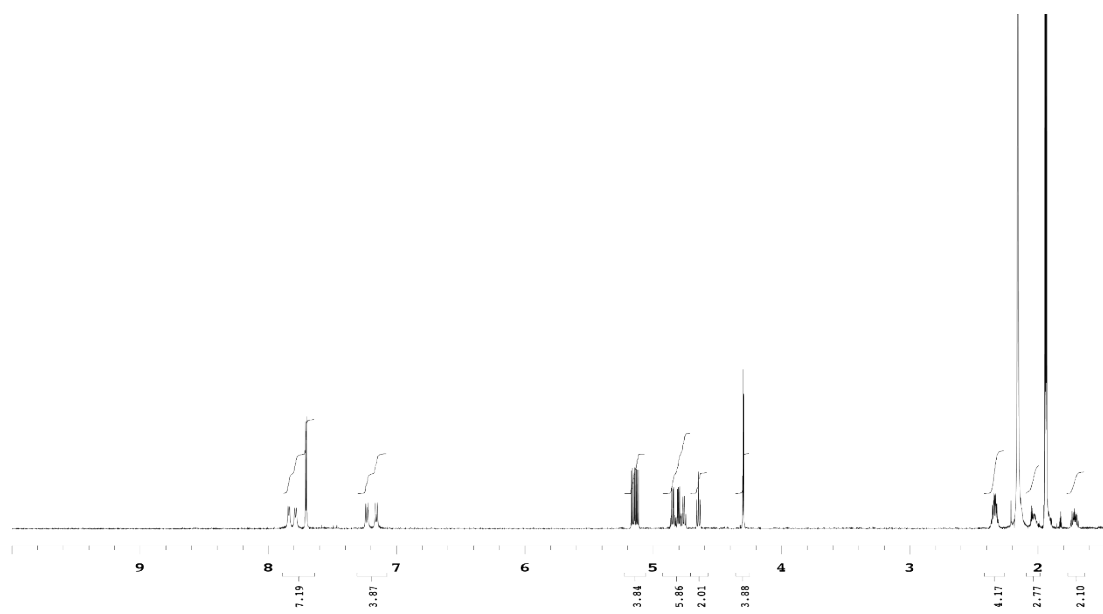

**Fig. S4** 1D  $^1\text{H}$  NMR spectrum of peptide **9** in  $\text{CD}_3\text{CN}$  at 298 K.

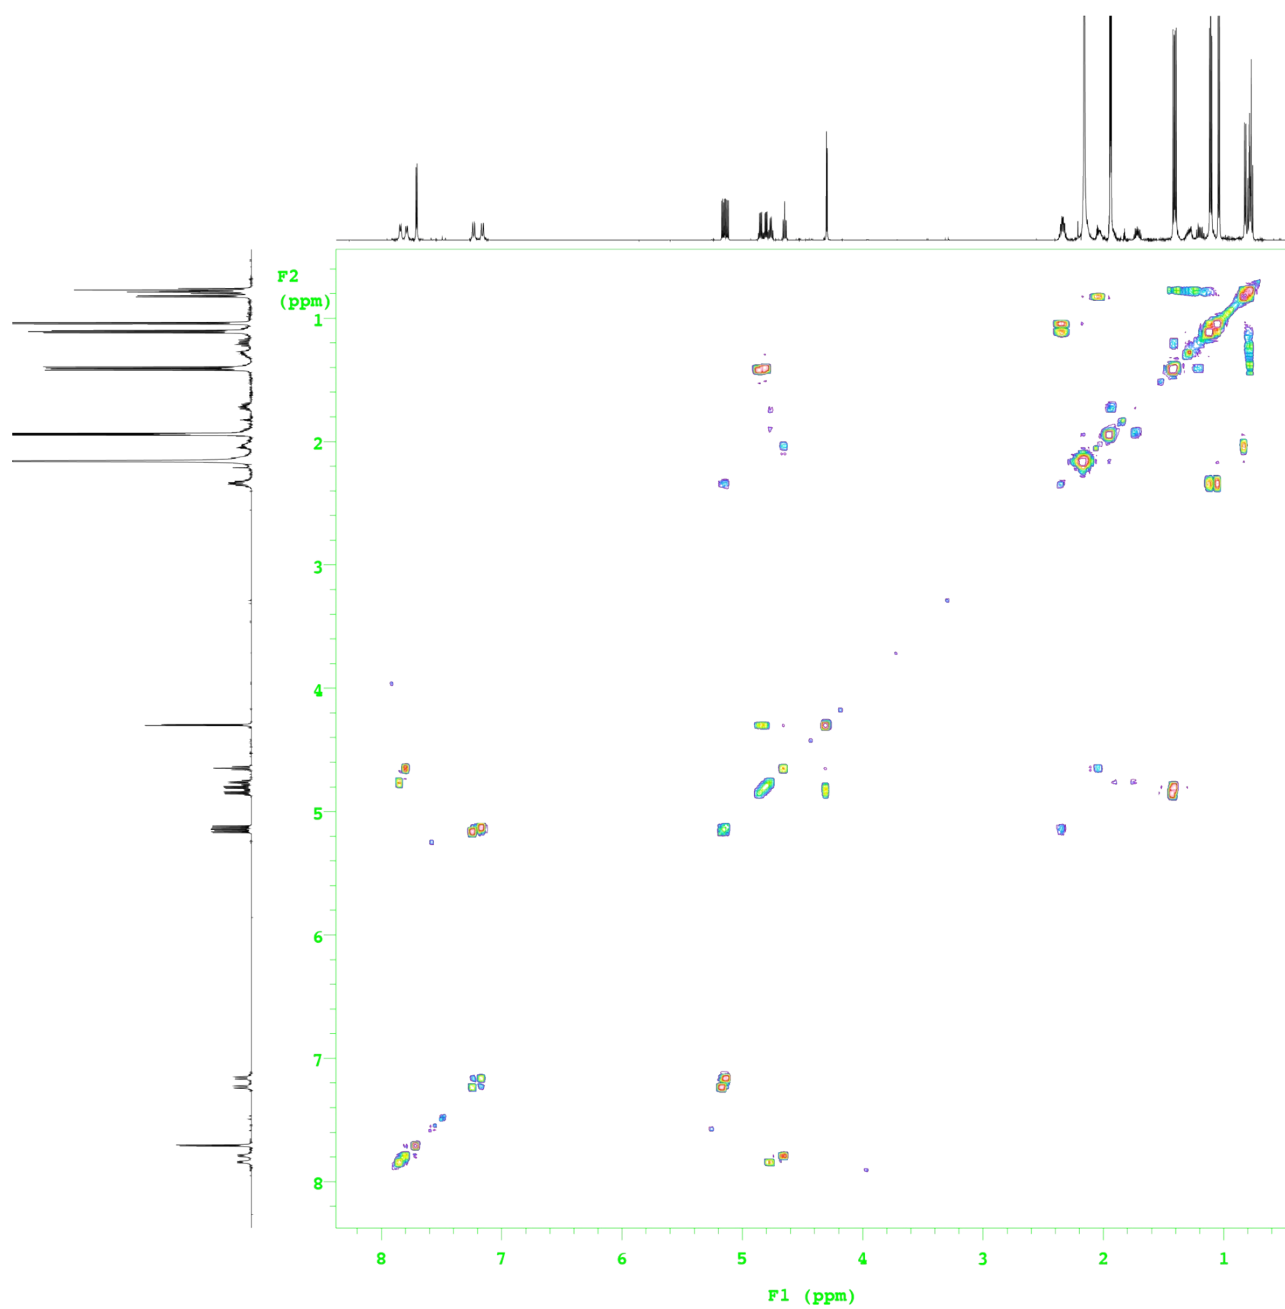

Fig. S5 2D  $^1\text{H}$ - $^1\text{H}$  COSY spectrum of peptide **9** in  $\text{CD}_3\text{CN}$  at 298 K.

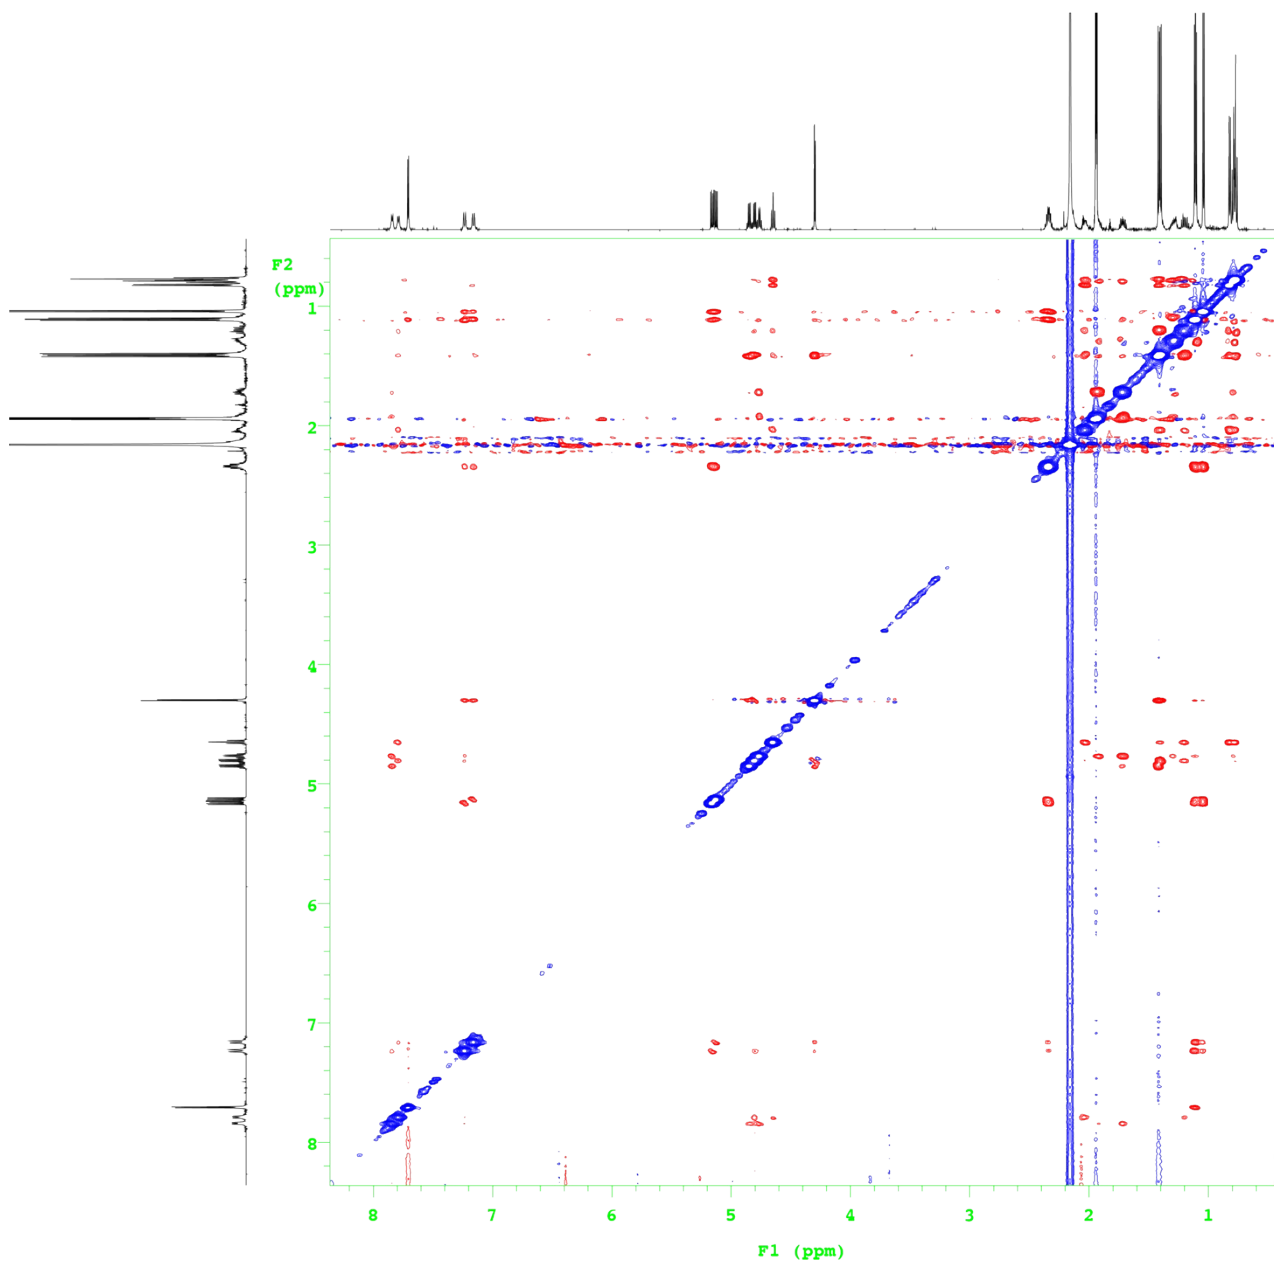

**Fig. S6** 2D  $^1\text{H}$ - $^1\text{H}$  ROESY spectrum of peptide **9** in  $\text{CD}_3\text{CN}$  at 298 K.

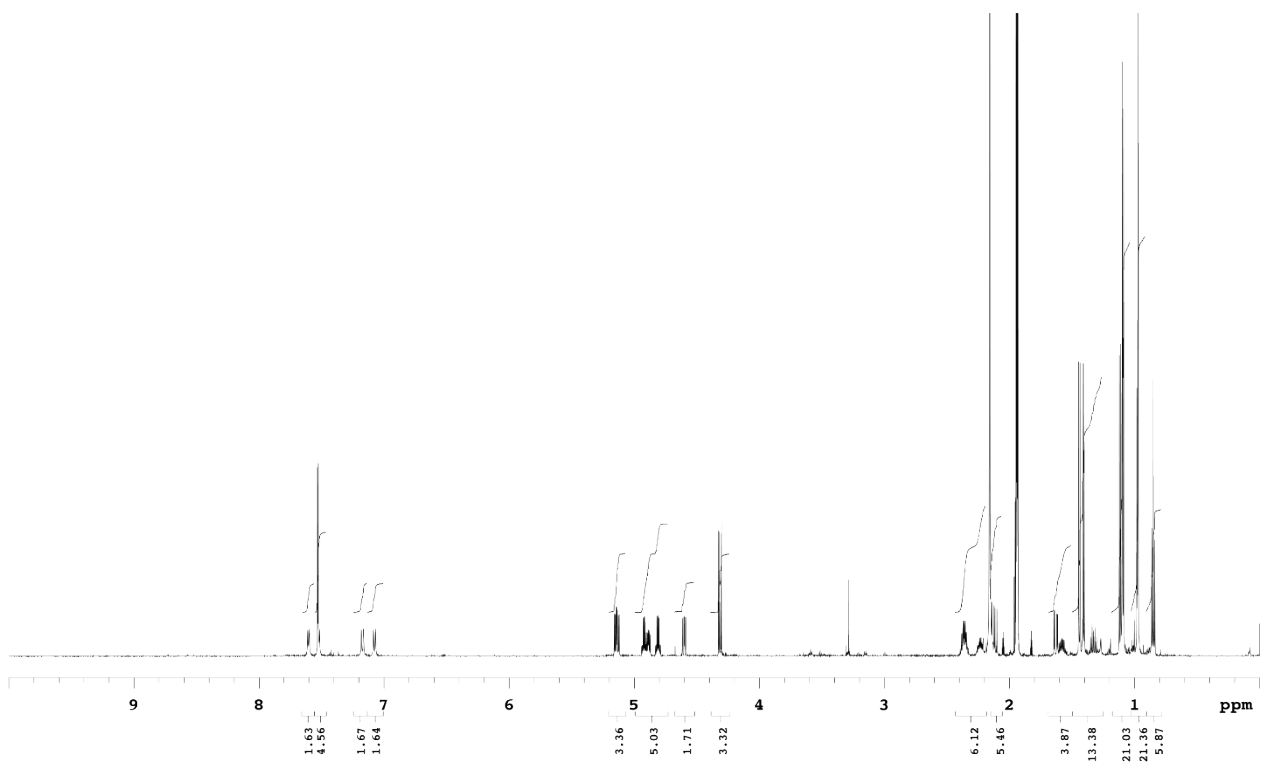

**Fig. S7** 1D  $^1\text{H}$  NMR spectrum of peptide **10** in  $\text{CD}_3\text{CN}$  at 298 K.



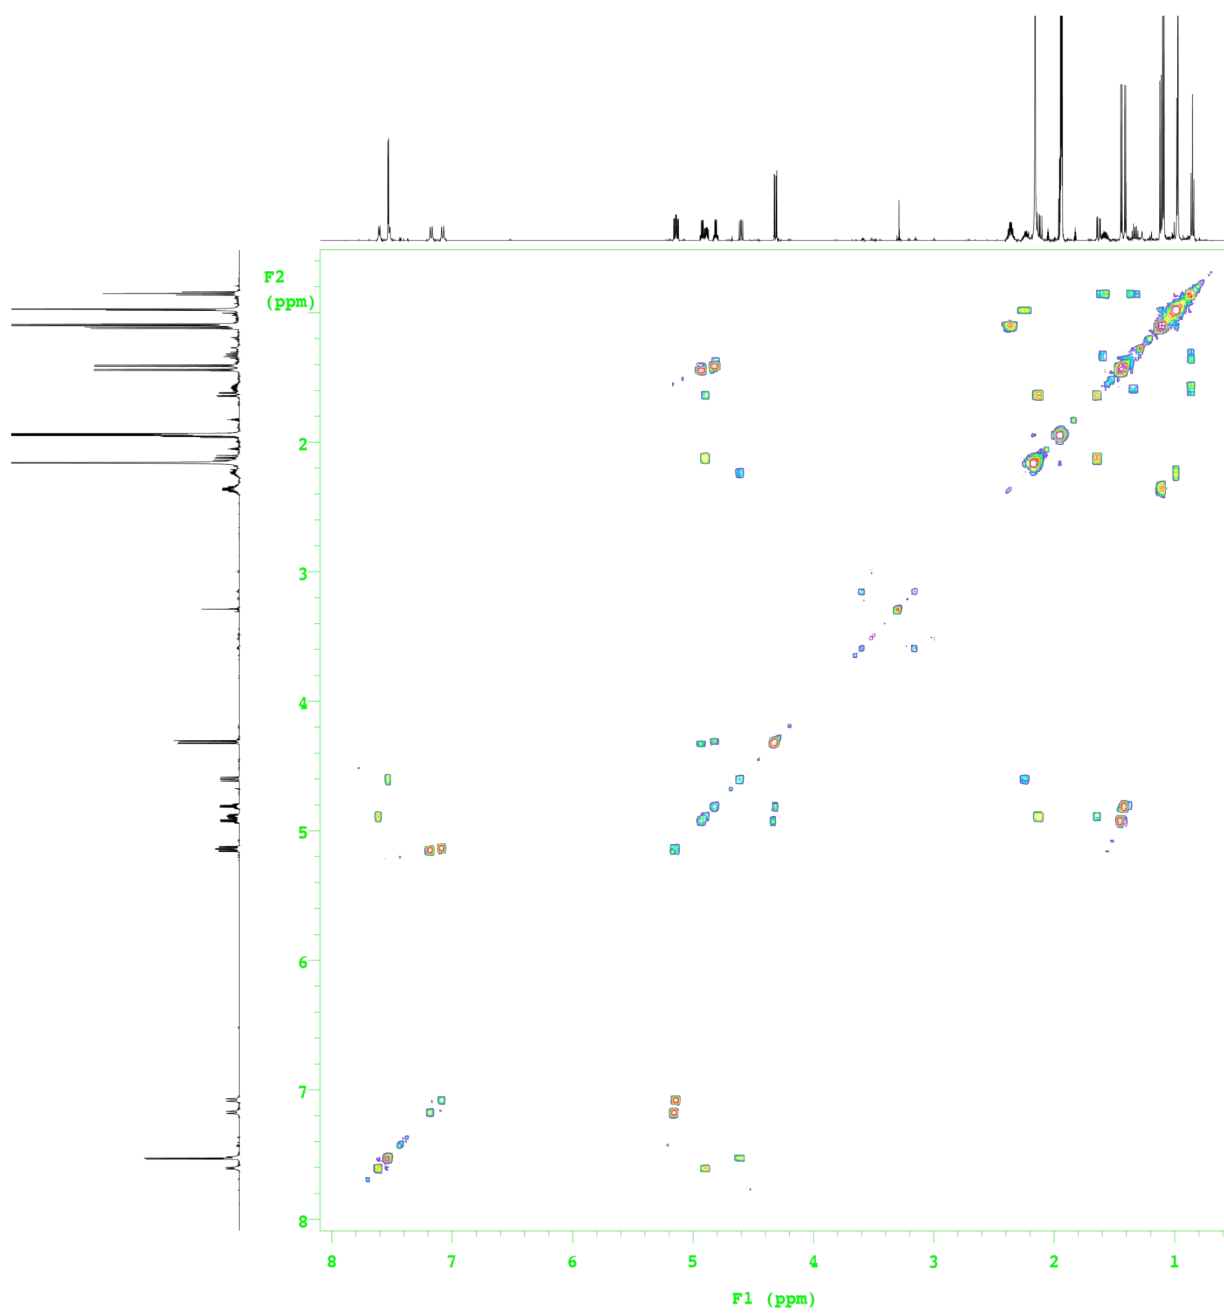

**Fig. S8** 2D  $^1\text{H}$ - $^1\text{H}$  COSY spectrum of peptide **10** in  $\text{CD}_3\text{CN}$  at 298 K.



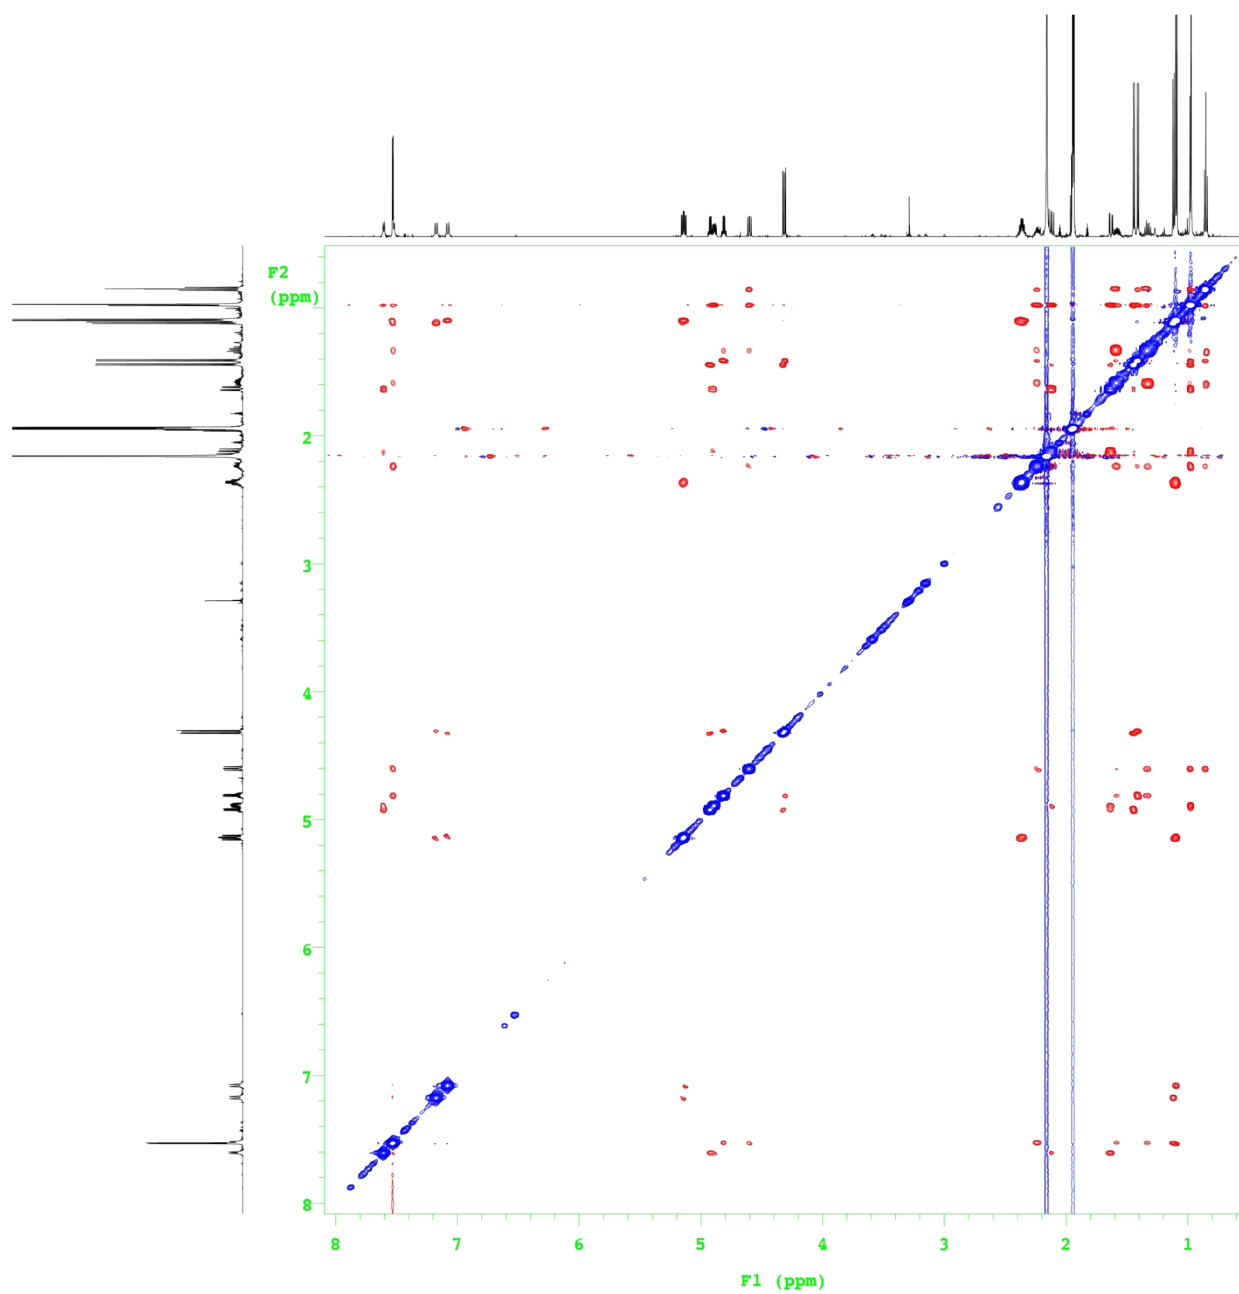

**Fig. S9** 2D  $^1\text{H}$ - $^1\text{H}$  ROESY spectrum of peptide **10** in  $\text{CD}_3\text{CN}$  at 298 K.

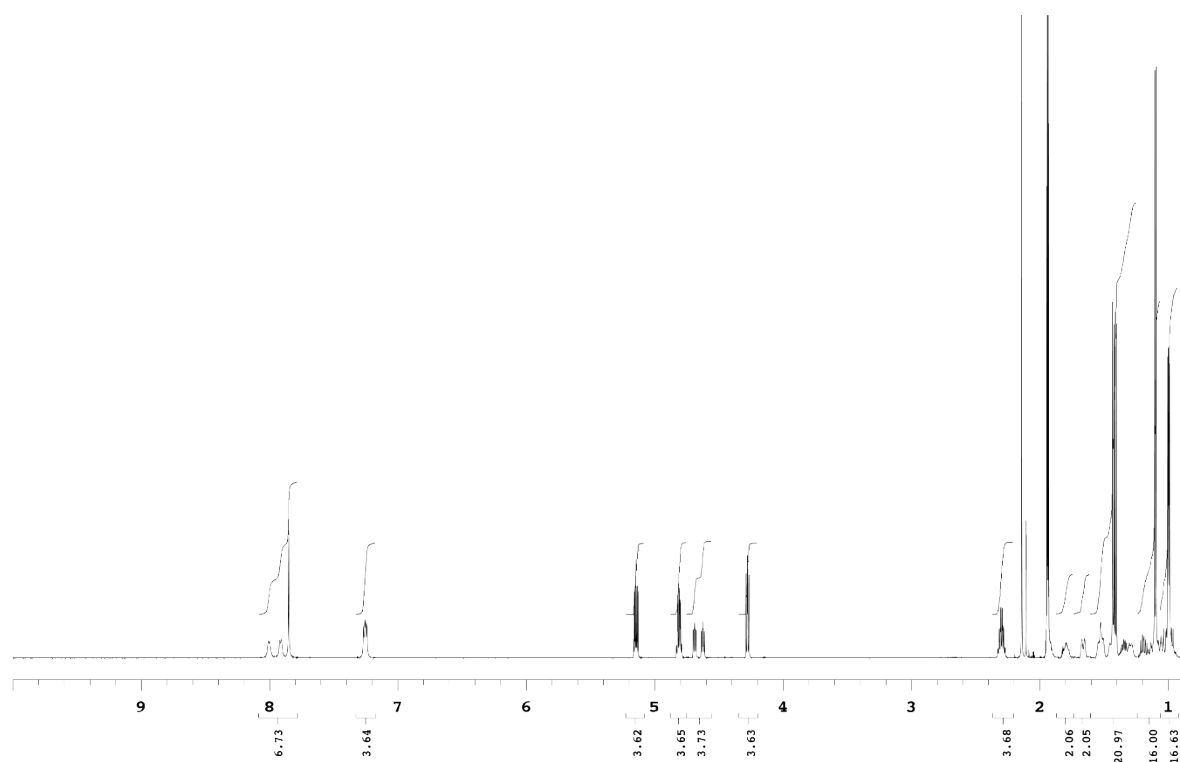

**Fig. S10** 1D <sup>1</sup>H NMR spectrum of peptide **11** in CD<sub>3</sub>CN at 298 K.

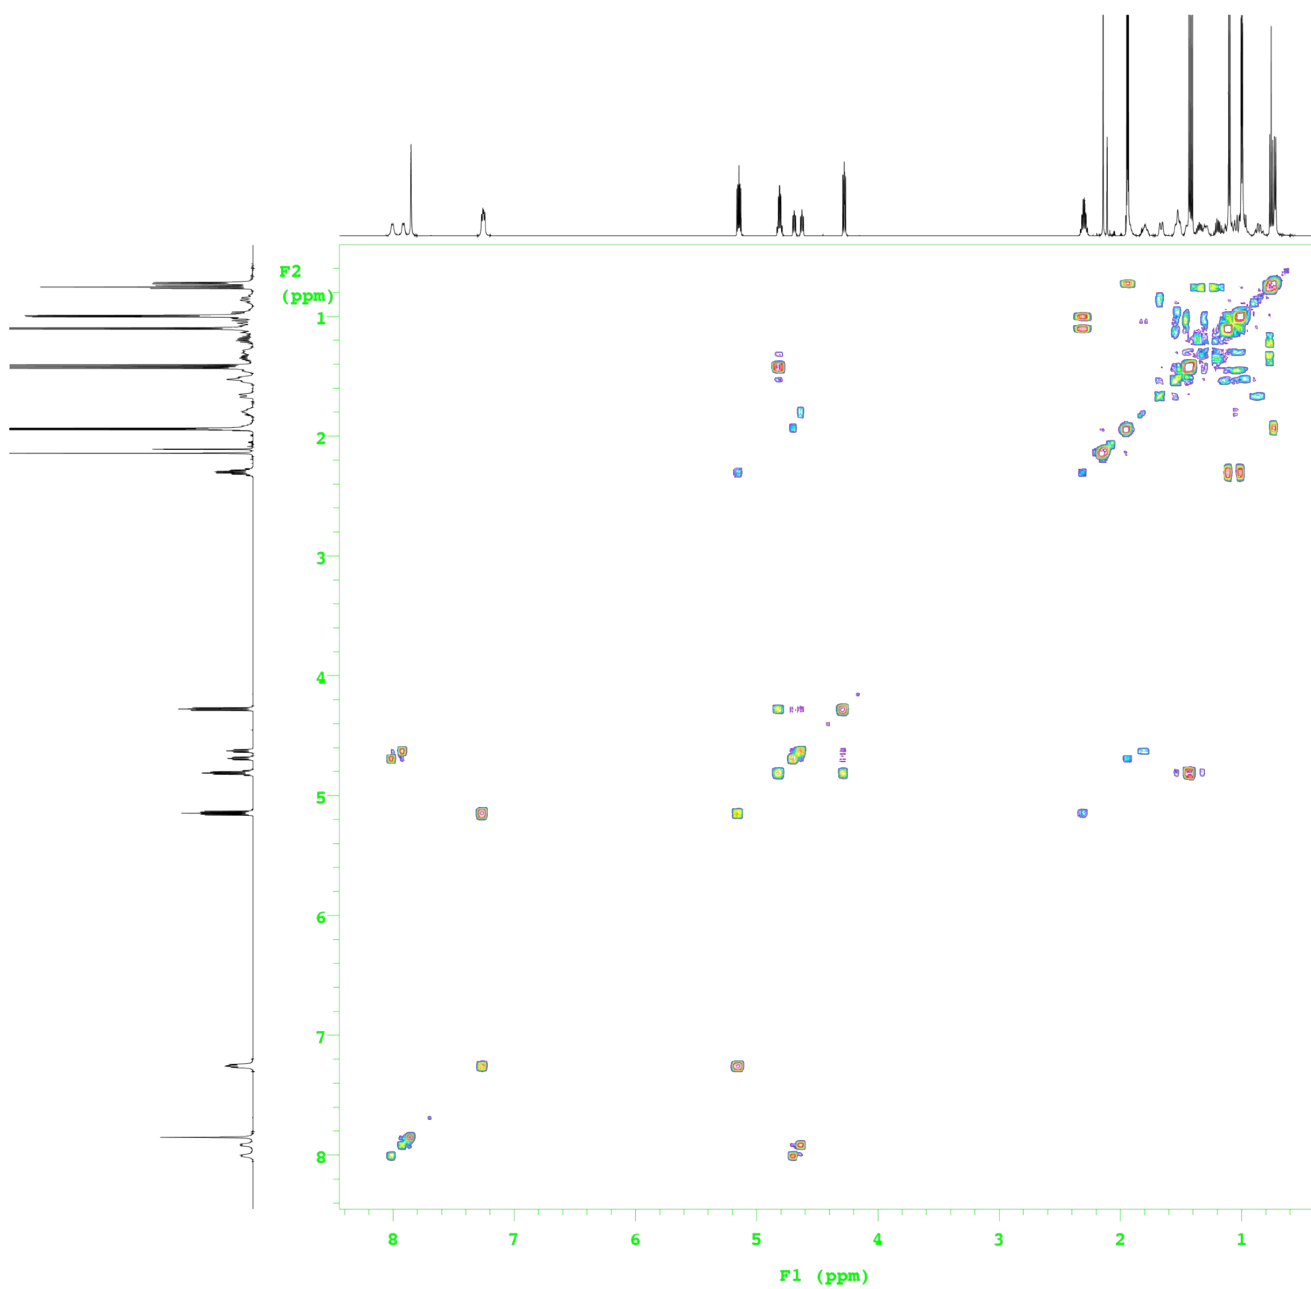

**Fig. S11** 2D  $^1\text{H}$ - $^1\text{H}$  COSY spectrum of peptide **11** in  $\text{CD}_3\text{CN}$  at 298 K.

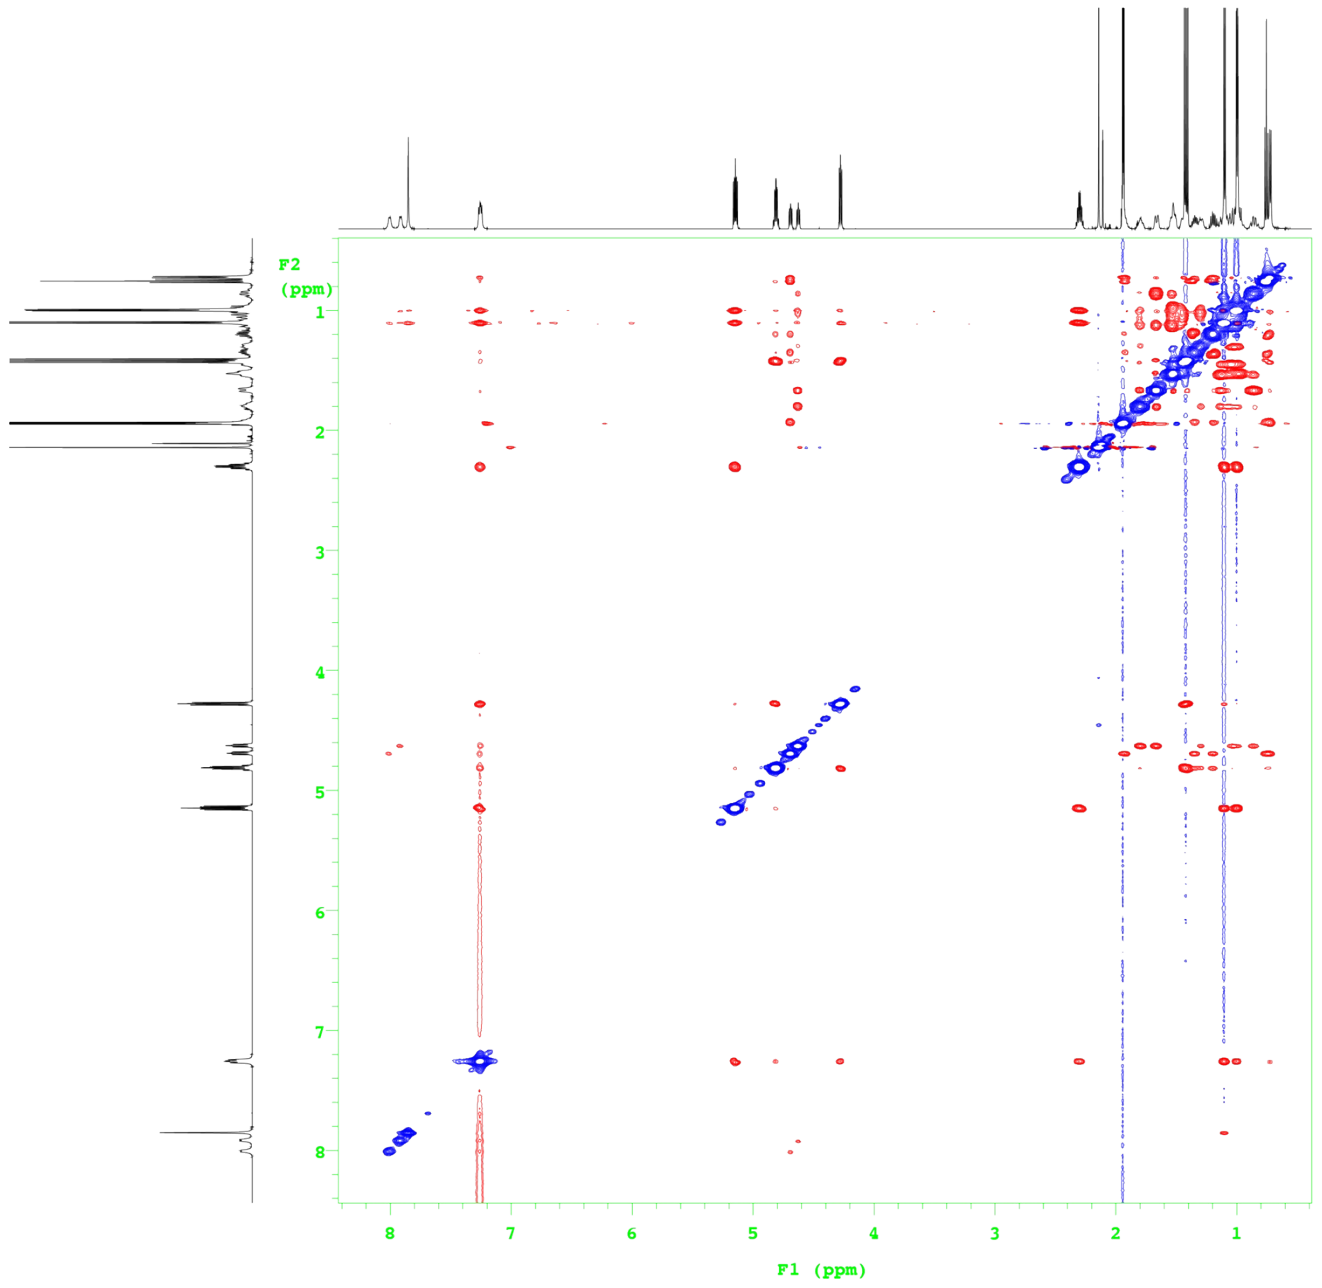

**Fig. S12** 2D  $^1\text{H}$ - $^1\text{H}$  ROESY spectrum of peptide **11** in  $\text{CD}_3\text{CN}$  at 298 K.

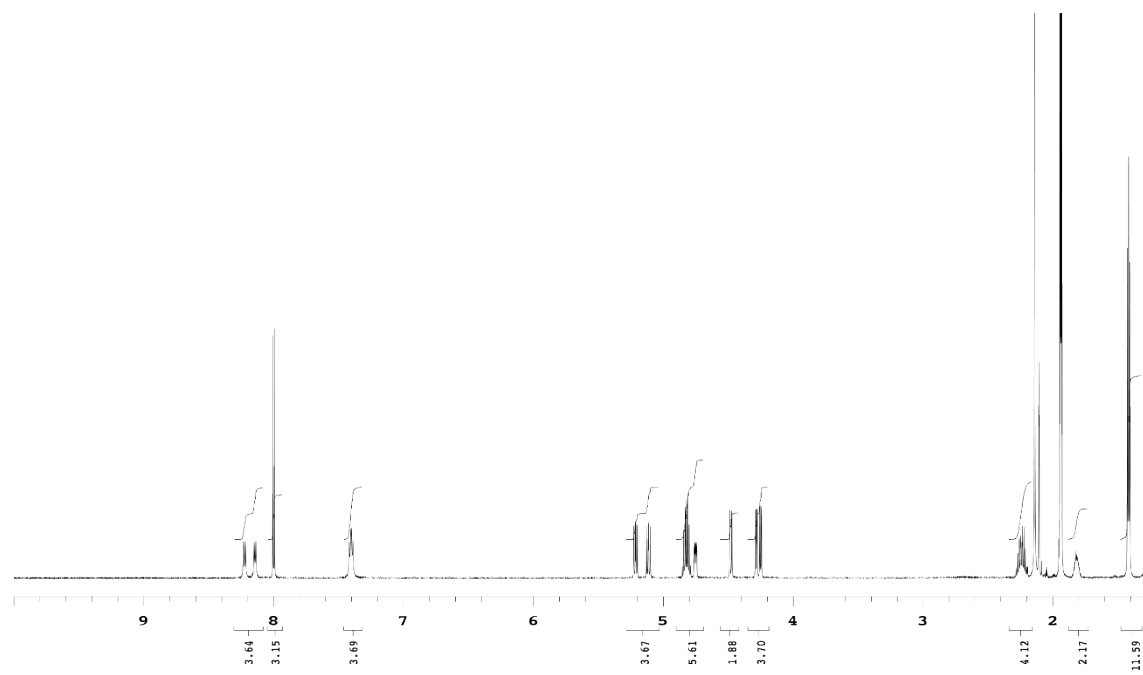

**Fig. S13** 1D  $^1\text{H}$  NMR spectrum of peptide **12** in  $\text{CD}_3\text{CN}$  at 298 K.

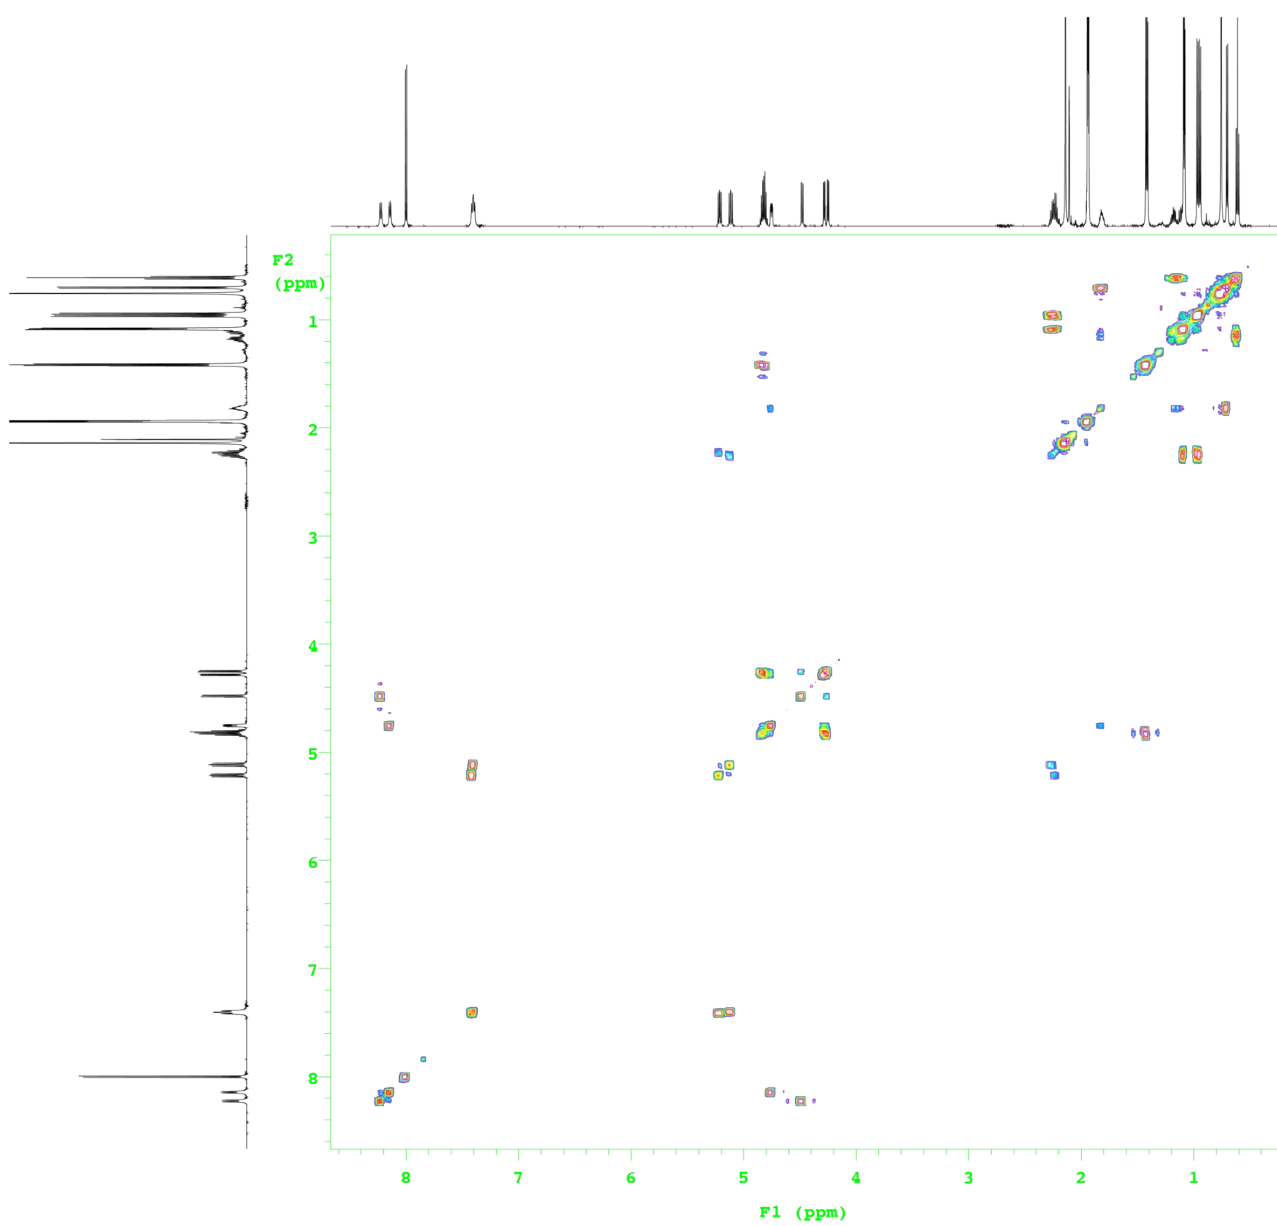

**Fig. S14** 2D  $^1\text{H}$ - $^1\text{H}$  COSY spectrum of peptide **12** in  $\text{CD}_3\text{CN}$  at 298 K.



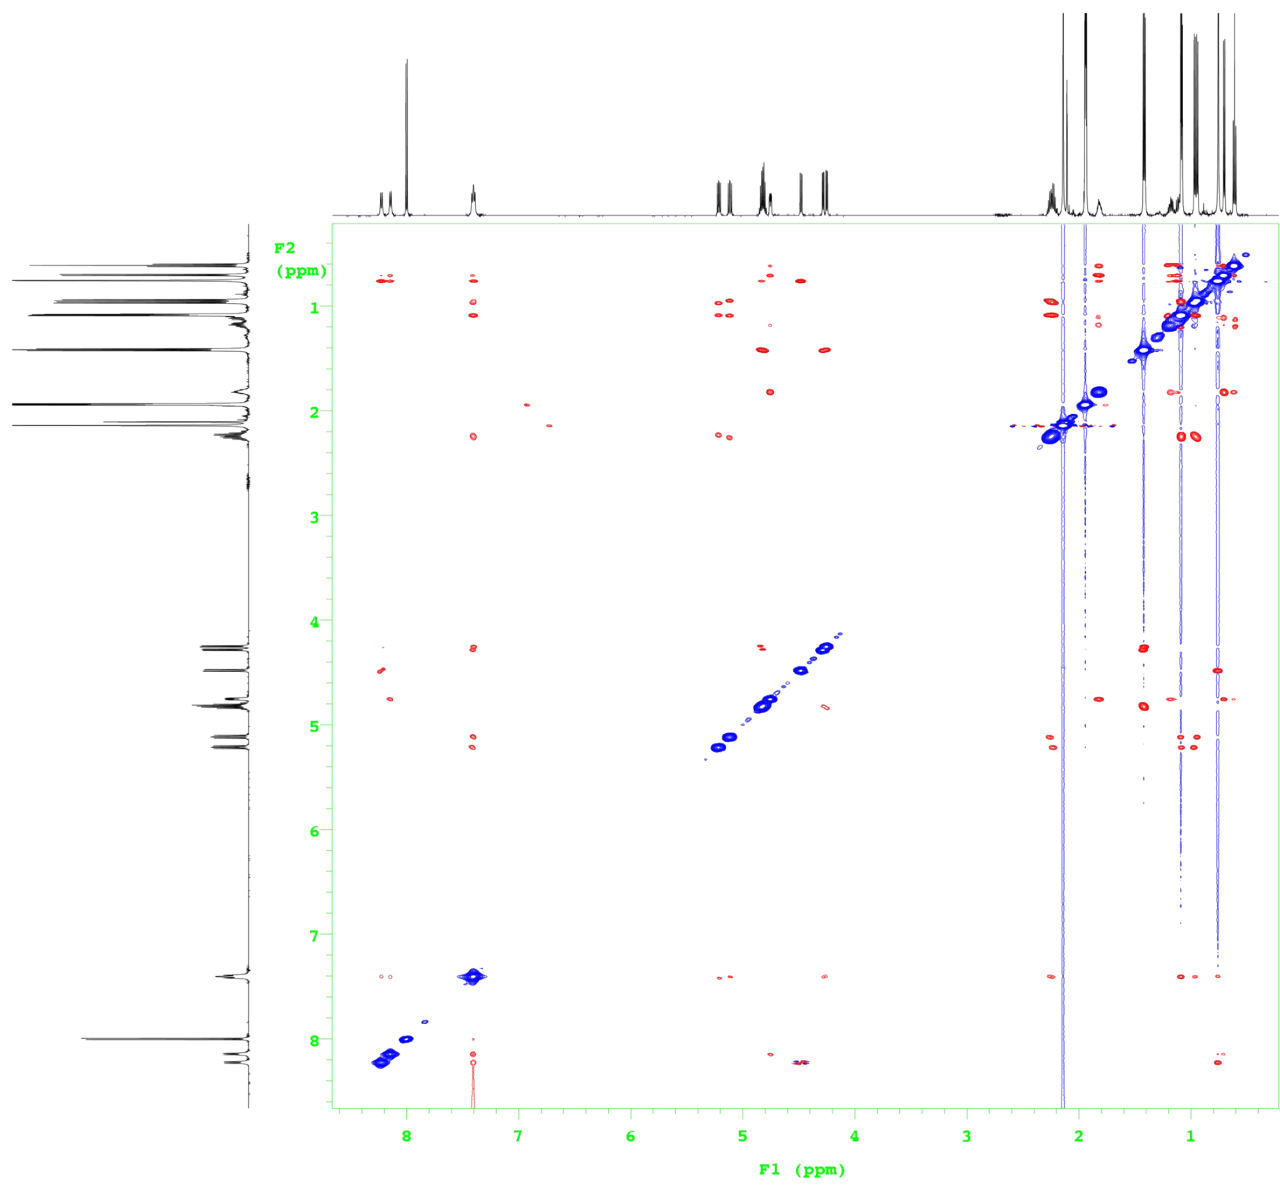

**Fig. S15** 2D  $^1\text{H}$ - $^1\text{H}$  ROESY spectrum of peptide **12** in  $\text{CD}_3\text{CN}$  at 298 K.

## HPLC analyses for peptides 8-12

HPLC analyses for peptides **8-12** were performed using analytical reverse HPLC system (2000 Series, JASCO LTD., Tokyo, Japan), equipped with PU-2089 HPLC pump, a 2077-UV intelligent UV/Vis detector, and COSMOSIL 5C<sub>18</sub>-MS-II packed column (4.6 x 150 mm, 5 μm particle size, Nacalai tesque, Kyoto, Japan). Ctechromatographies were carried out by a flow rate of 1 mL/min and monitored at 245 nm. Elution solvents used acetonitrile/water + 0.1 % formic acid from 50 to 100% in 18 min. HPLC profiles of peptides **8-12** were shown in Fig. S16.

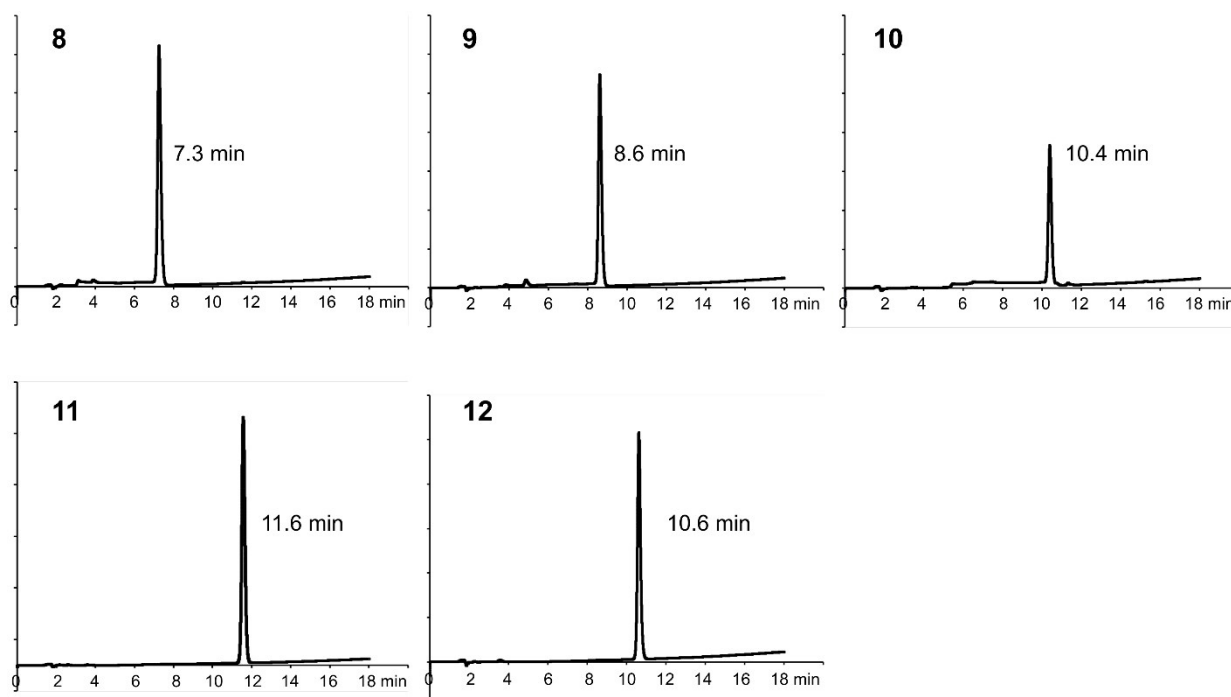

**Fig. S16** HPLC profiles of peptides **8-12**.

## Crystallographic data for peptides 10-12

**Table S1.** Crystal and experimental data for peptides **10-12**.

| Peptide                                                     | <b>10</b>                                                                                                           | <b>11</b>                                                                                                                            | <b>12</b>                                                                                                           |
|-------------------------------------------------------------|---------------------------------------------------------------------------------------------------------------------|--------------------------------------------------------------------------------------------------------------------------------------|---------------------------------------------------------------------------------------------------------------------|
| Formula                                                     | C <sub>37</sub> H <sub>54</sub> N <sub>8</sub> O <sub>6</sub> S <sub>2</sub><br>2(C <sub>3</sub> H <sub>7</sub> NO) | C <sub>38</sub> H <sub>54</sub> N <sub>8</sub> O <sub>6</sub> S <sub>2</sub><br>2(C <sub>4</sub> H <sub>9</sub> NO) H <sub>2</sub> O | C <sub>36</sub> H <sub>52</sub> N <sub>8</sub> O <sub>6</sub> S <sub>2</sub><br>2(C <sub>3</sub> H <sub>7</sub> NO) |
| Formula Weight                                              | 917.20                                                                                                              | 975.27                                                                                                                               | 903.17                                                                                                              |
| Cell System                                                 | monoclinic                                                                                                          | tetragonal                                                                                                                           | monoclinic                                                                                                          |
| Space Group                                                 | P2 <sub>1</sub>                                                                                                     | P4 <sub>1</sub>                                                                                                                      | C2                                                                                                                  |
| <i>a</i> , Å                                                | 12.9799(6)                                                                                                          | 12.9682(9)                                                                                                                           | 15.917(3)                                                                                                           |
| <i>b</i> , Å                                                | 12.1900(7)                                                                                                          | 12.9682(9)                                                                                                                           | 12.1964(19)                                                                                                         |
| <i>c</i> , Å                                                | 15.9375(8)                                                                                                          | 30.798(3)                                                                                                                            | 12.962(2)                                                                                                           |
| $\alpha$ , deg                                              | 90.0                                                                                                                | 90.0                                                                                                                                 | 90.0                                                                                                                |
| $\beta$ , deg                                               | 102.703(5)                                                                                                          | 90.0                                                                                                                                 | 102.303(2)                                                                                                          |
| $\gamma$ , deg                                              | 90.0                                                                                                                | 90.0                                                                                                                                 | 90.0                                                                                                                |
| Volume, Å <sup>3</sup>                                      | 2460.0(2)                                                                                                           | 5179.4(7)                                                                                                                            | 2458.5(7)                                                                                                           |
| <i>Z</i>                                                    | 2                                                                                                                   | 4                                                                                                                                    | 2                                                                                                                   |
| <i>D<sub>c</sub></i> , g cm <sup>-3</sup>                   | 1.238                                                                                                               | 1.251                                                                                                                                | 1.220                                                                                                               |
| <i>F</i> (000)                                              | 984                                                                                                                 | 2096                                                                                                                                 | 968                                                                                                                 |
| $\mu$ , mm <sup>-1</sup>                                    | 1.464 (Cu K $\alpha$ )                                                                                              | 0.164 (Mo K $\alpha$ )                                                                                                               | 0.166 (Mo K $\alpha$ )                                                                                              |
| Wavelength, Å                                               | 1.54178                                                                                                             | 0.71073                                                                                                                              | 0.71073                                                                                                             |
| No. of reflections (obs)                                    | 13264                                                                                                               | 47663                                                                                                                                | 9560                                                                                                                |
| <i>R</i> <sub>INT</sub>                                     | 0.0321                                                                                                              | 0.0370                                                                                                                               | 0.0366                                                                                                              |
| $\theta_{\max}$ , deg                                       | 67.729                                                                                                              | 27.87                                                                                                                                | 26.37                                                                                                               |
| No. of reflections<br>( <i>I</i> > 2 $\sigma$ ( <i>I</i> )) | 5358                                                                                                                | 10492                                                                                                                                | 4460                                                                                                                |
| Flack parameter                                             | 0.38(2)                                                                                                             | 0.09(11)                                                                                                                             | 0.1(2)                                                                                                              |
| <i>R</i> 1                                                  | 0.0993                                                                                                              | 0.0799                                                                                                                               | 0.0962                                                                                                              |
| <i>wR</i>                                                   | 0.2545                                                                                                              | 0.2149                                                                                                                               | 0.2606                                                                                                              |
| Goodness of fit                                             | 0.858                                                                                                               | 1.034                                                                                                                                | 1.153                                                                                                               |
| ( $\Delta/\sigma$ ) <sub>max</sub>                          | 0.064                                                                                                               | 0.011                                                                                                                                | 0.007                                                                                                               |
| Fraction for $\theta_{\max}$                                | 0.999                                                                                                               | 0.999                                                                                                                                | 0.994                                                                                                               |
| $\Delta\rho_{\max}$ , e Å <sup>-3</sup>                     | 0.605                                                                                                               | 1.637                                                                                                                                | 0.613                                                                                                               |
| $\Delta\rho_{\min}$ , e Å <sup>-3</sup>                     | -0.453                                                                                                              | -0.560                                                                                                                               | -0.238                                                                                                              |
| CCDC Number                                                 | 2007056                                                                                                             | 2007057                                                                                                                              | 2007058                                                                                                             |

## VT-NMR data for peptide 1

**Table S2.**  $^1\text{H}$  NMR chemical shifts of peptide 1 (ca. 5mM) in acetonitrile- $d_3$  at 298 K.

| Residue            | $\delta$ HN (ppm)<br>$^3J$ (Hz) | $\delta$ H $\alpha$ (ppm)<br>$^3J$ (Hz) | $\delta$ H $\beta$ (ppm)<br>$^3J$ (Hz) | $\delta$ H $\gamma$ (ppm)<br>$^3J$ (Hz)                                          | $\delta$ H $\delta$ (ppm)<br>$^3J$ (Hz) | $\delta$ Other protons (ppm)<br>$^3J$ (Hz) |
|--------------------|---------------------------------|-----------------------------------------|----------------------------------------|----------------------------------------------------------------------------------|-----------------------------------------|--------------------------------------------|
| Ile <sup>1</sup>   | 7.93<br>d, J = 8.4              | 4.72<br>ddd, J = 8.4, 5.4, 1.2          | 1.91<br>m                              | $\gamma\text{CH}_2$ 1.23, 1.12<br>m, m<br>$\gamma\text{CH}_3$ 0.76<br>d, J = 6.6 | 0.68<br>t, J = 7.2                      |                                            |
| Oxz <sup>2</sup>   |                                 | 4.28<br>dd, J = 6.0, 1.2                | 4.80<br>quint. J = 6.0                 | 1.42<br>d, J = 6.0                                                               |                                         |                                            |
| D-Val <sup>3</sup> | 7.26<br>d, J = 10.2             | 5.15<br>dd, J = 10.2, 6.6               | 2.30<br>oct. J = 6.6                   | $\gamma\text{CH}_3$ 1.10, $\gamma'\text{CH}_3$ 1.00<br>d, J = 6.6, d, J = 6.6    |                                         |                                            |
| Thz <sup>4</sup>   |                                 |                                         |                                        |                                                                                  |                                         | 7.87<br>s                                  |
| Ile <sup>5</sup>   | 7.93<br>d, J = 8.4              | 4.72<br>ddd, J = 8.4, 5.4, 1.2          | 1.91<br>m                              | $\gamma\text{CH}_2$ 1.23, 1.12<br>m, m<br>$\gamma\text{CH}_3$ 0.76<br>d, J = 6.6 | 0.68<br>t, J = 7.2                      |                                            |
| Oxz <sup>6</sup>   |                                 | 4.28<br>dd, J = 6.0, 1.2                | 4.80<br>quint. J = 6.0                 | 1.42<br>d, J = 6.0                                                               |                                         |                                            |
| D-Val <sup>7</sup> | 7.26<br>d, J = 10.2             | 5.15<br>dd, J = 10.2, 6.6               | 2.30<br>oct. J = 6.6                   | $\gamma\text{CH}_3$ 1.10, $\gamma'\text{CH}_3$ 1.00<br>d, J = 6.6, d, J = 6.6    |                                         |                                            |
| Thz <sup>8</sup>   |                                 |                                         |                                        |                                                                                  |                                         | 7.87<br>s                                  |

**Table S3.** Chemical shifts of amide and Thz protons of peptide 1 at various temperatures and their temperature coefficients.

| T (K)                              | $\delta$ Ile <sup>1,5</sup> HN (ppm) | $\delta$ D-Val <sup>3,7</sup> HN (ppm) | $\delta$ Thz <sup>4,8</sup> H (ppm) |
|------------------------------------|--------------------------------------|----------------------------------------|-------------------------------------|
| 273                                | 7.88                                 | 7.28                                   | 7.82                                |
| 283                                | 7.90                                 | 7.27                                   | 7.84                                |
| 293                                | 7.92                                 | 7.27                                   | 7.86                                |
| 303                                | 7.94                                 | 7.27                                   | 7.88                                |
| 313                                | 7.97                                 | 7.28                                   | 7.90                                |
| 323                                | 7.98                                 | 7.28                                   | 7.92                                |
| 333                                | 8.00                                 | 7.28                                   | 7.93                                |
| $\Delta\delta/\Delta T$<br>(ppb/K) | 2.0                                  | 0.0                                    | 1.9                                 |

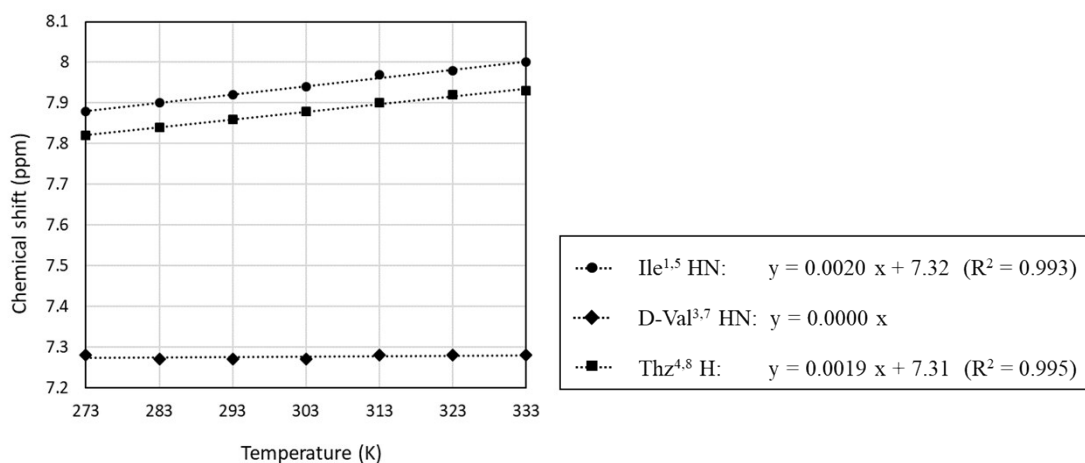

**Fig. S17** Diagrams of the amide and Thz protons temperature coefficients of peptide 1.

## VT-NMR data for peptide 2

**Table S4.** <sup>1</sup>H NMR chemical shifts of peptide 2 (ca. 5mM) in acetonitrile-*d*<sub>3</sub> at 298 K.

| Residue            | δ HN (ppm)<br><sup>3</sup> J (Hz) | δ H <sub>α</sub> (ppm)<br><sup>3</sup> J (Hz) | δ H <sub>β</sub> (ppm)<br><sup>3</sup> J (Hz) | δ H <sub>γ</sub> (ppm)<br><sup>3</sup> J (Hz)                              | δ H <sub>δ</sub> (ppm)<br><sup>3</sup> J (Hz) | δ Other protons (ppm)<br><sup>3</sup> J (Hz) |
|--------------------|-----------------------------------|-----------------------------------------------|-----------------------------------------------|----------------------------------------------------------------------------|-----------------------------------------------|----------------------------------------------|
| Ala <sup>1</sup>   | 7.78<br>d, J = 7.2                | 4.84<br>quint. J = 7.2                        | 1.48<br>d, J = 7.2                            |                                                                            |                                               |                                              |
| Oxz <sup>2</sup>   |                                   | 4.29<br>dd, J = 4.5, 0.6                      | 4.78<br>qd, J = 6.0, 4.5                      | 1.40<br>d, J = 6.0                                                         |                                               |                                              |
| D-Val <sup>3</sup> | 7.13<br>d, J = 10.2               | 5.13<br>dd, J = 10.2, 4.8                     | 2.34<br>m                                     | γCH <sub>3</sub> 1.10, γ'CH <sub>3</sub> 1.06<br>d, J = 6.6, d, J = 6.6    |                                               |                                              |
| Thz <sup>4</sup>   |                                   |                                               |                                               |                                                                            |                                               | 7.64<br>s                                    |
| Ile <sup>5</sup>   | 7.69<br>d, J = 7.8                | 4.65<br>t, J = 7.8                            | 2.12<br>m                                     | γCH <sub>2</sub> 1.43, 1.24<br>m, m<br>γCH <sub>3</sub> 0.92<br>d, J = 7.2 | 0.79<br>t, J = 7.2                            |                                              |
| Oxz <sup>6</sup>   |                                   | 4.30<br>dd, J = 4.8, 0.6                      | 4.87<br>qd, J = 6.6, 4.8                      | 1.42<br>d, J = 6.6                                                         |                                               |                                              |
| D-Val <sup>7</sup> | 7.23<br>d, J = 10.2               | 5.17<br>dd, J = 10.2, 4.8                     | 2.33<br>m                                     | γCH <sub>3</sub> 1.11, γ'CH <sub>3</sub> 1.06<br>d, J = 6.6, d, J = 6.6    |                                               |                                              |
| Thz <sup>8</sup>   |                                   |                                               |                                               |                                                                            |                                               | 7.64<br>s                                    |

**Table S5.** Chemical shifts of amide and Thz protons of peptide 2 at various temperatures and their temperature coefficients.

| T (K)         | δ Ala <sup>1</sup> HN (ppm) | δ D-Val <sup>3</sup> HN (ppm) | δ Ile <sup>5</sup> HN (ppm) | δ D-Val <sup>7</sup> HN (ppm) | δ Thz <sup>4,8</sup> H (ppm) |
|---------------|-----------------------------|-------------------------------|-----------------------------|-------------------------------|------------------------------|
| 273           | 7.74                        | 7.09                          | 7.64                        | 7.21                          | 7.55                         |
| 283           | 7.75                        | 7.10                          | 7.66                        | 7.22                          | 7.58                         |
| 293           | 7.77                        | 7.12                          | 7.67                        | 7.23                          | 7.62                         |
| 303           | 7.79                        | 7.14                          | 7.71                        | 7.24                          | 7.66                         |
| 313           | 7.81                        | 7.15                          | 7.72                        | 7.25                          | 7.70                         |
| 323           | 7.84                        | 7.17                          | 7.75                        | 7.26                          | 7.74                         |
| 333           | 7.86                        | 7.18                          | 7.78                        | 7.26                          | 7.78                         |
| Δδ/ΔT (ppb/K) | 2.0                         | 1.6                           | 2.2                         | 1.0                           | 3.9                          |

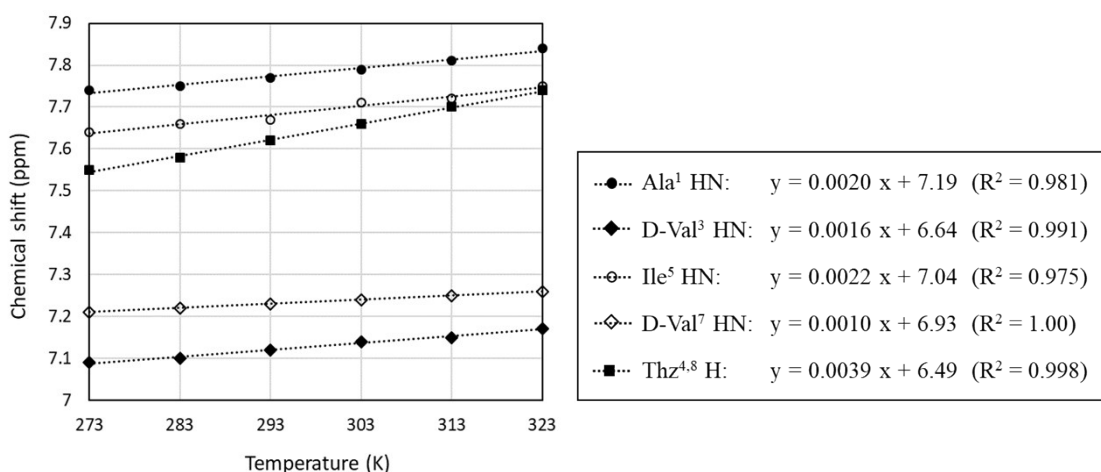

**Fig. S18** Diagrams of the amide and Thz protons temperature coefficients of peptide 2.

## VT-NMR data for peptide 3

**Table S6.**  $^1\text{H}$  NMR chemical shifts of peptide **3** (ca. 5mM) in acetonitrile- $d_3$  at 298 K.

| Residue             | $\delta$ HN (ppm)<br>$^3\text{J}$ (Hz) | $\delta$ H $\alpha$ (ppm)<br>$^3\text{J}$ (Hz) | $\delta$ H $\beta$ (ppm)<br>$^3\text{J}$ (Hz) | $\delta$ H $\gamma$ (ppm)<br>$^3\text{J}$ (Hz)                                   | $\delta$ H $\delta$ (ppm)<br>$^3\text{J}$ (Hz) | $\delta$ Other protons (ppm)<br>$^3\text{J}$ (Hz) |
|---------------------|----------------------------------------|------------------------------------------------|-----------------------------------------------|----------------------------------------------------------------------------------|------------------------------------------------|---------------------------------------------------|
| Val <sup>1</sup>    | 7.85<br>d, J = 7.2                     | 4.59<br>t, J = 7.2                             | 2.15<br>m                                     | $\gamma\text{CH}_3$ 0.85, $\gamma'\text{CH}_3$ 0.75<br>d, J = 6.6, d, J = 6.6    |                                                |                                                   |
| Oxz <sup>2</sup>    |                                        | 4.29<br>dd, J = 4.2, 1.2                       | 4.83<br>qd, J = 6.6, 4.2                      | 1.41<br>d, J = 6.6                                                               |                                                |                                                   |
| D-Val <sup>3</sup>  | 7.21<br>d, J = 10.2                    | 5.14<br>dd, J = 10.2, 6.6                      | 2.33<br>oct. J = 6.6                          | $\gamma\text{CH}_3$ 1.11, $\gamma'\text{CH}_3$ 1.02<br>d, J = 6.6, d, J = 6.6    |                                                |                                                   |
| Thz <sup>4or8</sup> |                                        |                                                |                                               |                                                                                  |                                                | 7.78<br>s                                         |
| Ile <sup>5</sup>    | 7.86<br>d, J = 6.6                     | 4.68<br>t, J = 6.6                             | 1.99<br>m                                     | $\gamma\text{CH}_2$ 1.31, 1.19<br>m, m<br>$\gamma\text{CH}_3$ 0.80<br>d, J = 7.2 | 0.72<br>t, J = 7.2                             |                                                   |
| Oxz <sup>6</sup>    |                                        | 4.30<br>dd, J = 4.5, 1.2                       | 4.82<br>qd, J = 6.0, 4.5                      | 1.42<br>d, J = 6.0                                                               |                                                |                                                   |
| D-Val <sup>7</sup>  | 7.23<br>d, J = 10.2                    | 5.15<br>dd, J = 10.2, 6.6                      | 2.31<br>oct. J = 6.6                          | $\gamma\text{CH}_3$ 1.10, $\gamma'\text{CH}_3$ 1.02<br>d, J = 6.6, d, J = 6.6    |                                                |                                                   |
| Thz <sup>4or8</sup> |                                        |                                                |                                               |                                                                                  |                                                | 7.79<br>s                                         |

The chemical shifts of Thz<sup>4</sup>H and Thz<sup>8</sup>H were indistinguishable.

**Table S7.** Chemical shifts of amide and Thz protons of peptide **3** at various temperatures and their temperature coefficients.

| T (K)                              | $\delta$ Val <sup>1</sup> HN (ppm) | $\delta$ D-Val <sup>3</sup> HN (ppm) | $\delta$ Ile <sup>5</sup> HN (ppm) | $\delta$ D-Val <sup>7</sup> HN (ppm) | $\delta$ Thz <sup>4or8</sup> H (ppm) | $\delta$ Thz <sup>4or8</sup> H (ppm) |
|------------------------------------|------------------------------------|--------------------------------------|------------------------------------|--------------------------------------|--------------------------------------|--------------------------------------|
| 273                                | 7.79                               | 7.20                                 | 7.79                               | 7.20                                 | 7.70                                 | 7.70                                 |
| 283                                | 7.82                               | 7.20                                 | 7.82                               | 7.22                                 | 7.73                                 | 7.74                                 |
| 293                                | 7.84                               | 7.21                                 | 7.84                               | 7.23                                 | 7.76                                 | 7.78                                 |
| 303                                | 7.86                               | 7.21                                 | 7.88                               | 7.23                                 | 7.80                                 | 7.81                                 |
| 313                                | 7.89                               | 7.22                                 | 7.91                               | 7.25                                 | 7.82                                 | 7.84                                 |
| 323                                | 7.91                               | 7.23                                 | 7.93                               | 7.25                                 | 7.85                                 | 7.86                                 |
| 333                                | 7.93                               | 7.23                                 | 7.96                               | 7.26                                 | 7.87                                 | 7.89                                 |
| $\Delta\delta/\Delta T$<br>(ppb/K) | 2.3                                | 0.6                                  | 2.9                                | 0.9                                  | 2.9                                  | 3.1                                  |

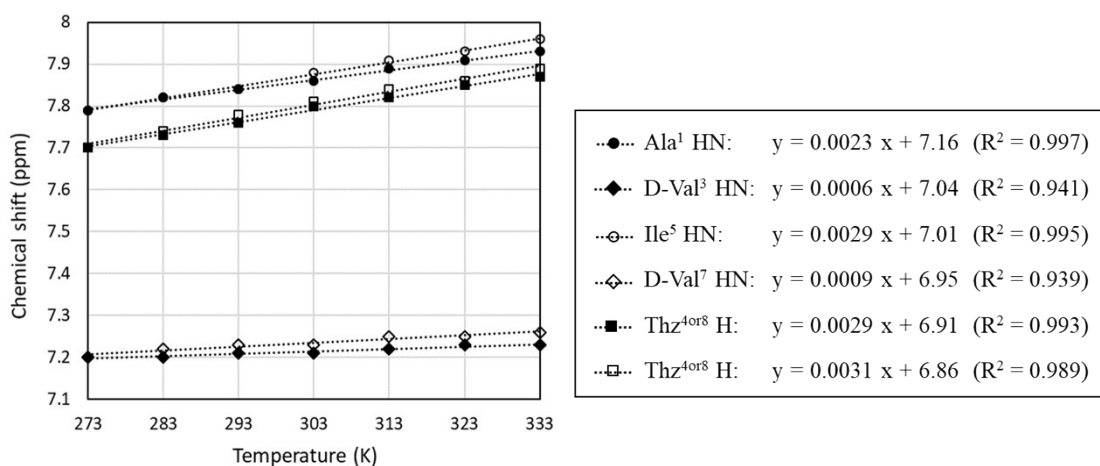

**Fig. S19** Diagrams of the amide and Thz protons temperature coefficients of peptide **3**.

**VT-NMR data for peptide 4**

**Table S8.** <sup>1</sup>H NMR chemical shifts of peptide **4** (ca. 5mM) in acetonitrile-*d*<sub>3</sub> at 298 K.

| Residue            | $\delta$ HN (ppm)<br><sup>3</sup> J (Hz) | $\delta$ H $\alpha$ (ppm)<br><sup>3</sup> J (Hz) | $\delta$ H $\beta$ (ppm)<br><sup>3</sup> J (Hz) | $\delta$ H $\gamma$ (ppm)<br><sup>3</sup> J (Hz)                                        | $\delta$ H $\delta$ (ppm)<br><sup>3</sup> J (Hz)                                        | $\delta$ Other protons (ppm)<br><sup>3</sup> J (Hz) |
|--------------------|------------------------------------------|--------------------------------------------------|-------------------------------------------------|-----------------------------------------------------------------------------------------|-----------------------------------------------------------------------------------------|-----------------------------------------------------|
| Leu <sup>1</sup>   | 7.71<br>d, J = 6.6                       | 4.81<br>m                                        | $\gamma$ CH <sub>2</sub> 2.02, 1.55<br>m, m     | 1.58<br>m                                                                               | $\delta$ CH <sub>3</sub> 0.93, $\delta'$ CH <sub>3</sub> 0.88<br>d, J = 6.6, d, J = 6.6 |                                                     |
| Oxz <sup>2</sup>   |                                          | 4.30<br>d, J = 3.0                               | 4.81<br>m                                       | 1.39<br>d, J = 6.0                                                                      |                                                                                         |                                                     |
| D-Val <sup>3</sup> | 7.20<br>d, J = 10.2                      | 5.16<br>dd, J = 10.2, 4.8                        | 2.35<br>m                                       | $\gamma$ CH <sub>3</sub> 1.12, $\gamma'$ CH <sub>3</sub> 1.07<br>d, J = 7.2, d, J = 7.2 |                                                                                         |                                                     |
| Thz <sup>4</sup>   |                                          |                                                  |                                                 |                                                                                         |                                                                                         | 7.60<br>s                                           |
| Ile <sup>5</sup>   | 7.67<br>d, J = 7.8                       | 4.61<br>dd, J = 9.3, 7.8                         | 2.14<br>m                                       | $\gamma$ CH <sub>2</sub> 1.52, 1.27<br>m, m                                             | $\gamma$ CH <sub>3</sub> 0.91<br>d, J = 7.2                                             | 0.82<br>t, J = 7.2                                  |
| Oxz <sup>6</sup>   |                                          | 4.31<br>d, J = 4.2                               | 4.87<br>qd, J = 6.0, 4.2                        | 1.43<br>d, J = 6.0                                                                      |                                                                                         |                                                     |
| D-Val <sup>7</sup> | 7.11<br>d, J = 10.2                      | 5.14<br>dd, J = 10.2, 4.8                        | 2.35<br>m                                       | $\gamma$ CH <sub>3</sub> 1.10, $\gamma'$ CH <sub>3</sub> 1.07<br>d, J = 7.2, d, J = 7.2 |                                                                                         |                                                     |
| Thz <sup>8</sup>   |                                          |                                                  |                                                 |                                                                                         |                                                                                         | 7.60<br>s                                           |

**Table S9.** Chemical shifts of amide and Thz protons of peptide **4** at various temperatures and their temperature coefficients.

| T (K)                              | $\delta$ Leu <sup>1</sup> HN (ppm) | $\delta$ D-Val <sup>3</sup> HN (ppm) | $\delta$ Ile <sup>5</sup> HN (ppm) | $\delta$ D-Val <sup>7</sup> HN (ppm) | $\delta$ Thz <sup>4,8</sup> H (ppm) |
|------------------------------------|------------------------------------|--------------------------------------|------------------------------------|--------------------------------------|-------------------------------------|
| 273                                | 7.67                               | 7.19                                 | 7.62                               | 7.08                                 | 7.53                                |
| 283                                | 7.68                               | 7.19                                 | 7.64                               | 7.09                                 | 7.56                                |
| 293                                | 7.70                               | 7.20                                 | 7.66                               | 7.11                                 | 7.59                                |
| 303                                | 7.72                               | 7.21                                 | 7.68                               | 7.12                                 | 7.62                                |
| 313                                | 7.74                               | 7.21                                 | 7.71                               | 7.14                                 | 7.66                                |
| 323                                | 7.76                               | 7.22                                 | 7.74                               | 7.15                                 | 7.69                                |
| 333                                |                                    | 7.23                                 |                                    | 7.17                                 | 7.73                                |
| $\Delta\delta/\Delta T$<br>(ppb/K) | 1.9                                | 0.7                                  | 2.4                                | 1.5                                  | 3.3                                 |

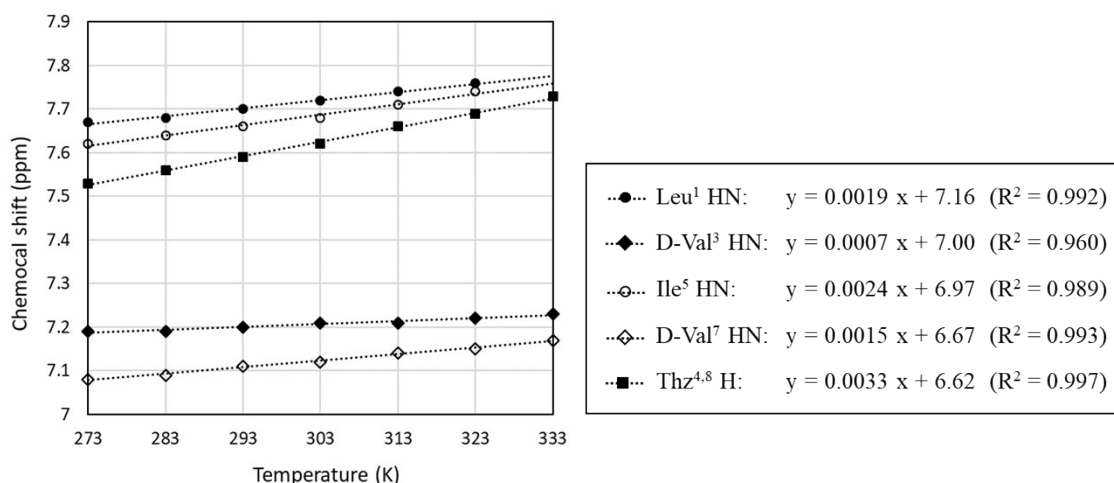

Fig. S20 Diagrams of the amide and Thz protons temperature coefficients of peptide 4.

### VT-NMR data for peptide 5

Table S10. <sup>1</sup>H NMR chemical shifts of peptide 5 (ca. 5mM) in acetonitrile-*d*<sub>3</sub> at 298 K.

| Residue             | $\delta$ HN (ppm)<br><sup>3</sup> J (Hz) | $\delta$ H $\alpha$ (ppm)<br><sup>3</sup> J (Hz) | $\delta$ H $\beta$ (ppm)<br><sup>3</sup> J (Hz)                              | $\delta$ H $\gamma$ (ppm)<br><sup>3</sup> J (Hz)                                         | $\delta$ H $\delta$ (ppm)<br><sup>3</sup> J (Hz) | $\delta$ Other protons (ppm)<br><sup>3</sup> J (Hz) |
|---------------------|------------------------------------------|--------------------------------------------------|------------------------------------------------------------------------------|------------------------------------------------------------------------------------------|--------------------------------------------------|-----------------------------------------------------|
| Phe <sup>1</sup>    | 7.85<br>d, J = 6.6                       | 5.07<br>ddd, J = 10.8, 6.6, 5.4                  | $\gamma$ CH <sub>2</sub> 3.31, 3.25<br>dd, J = 13.2, 10.8, dd, J = 13.2, 5.4 |                                                                                          |                                                  | Ar 7.28-7.25, 7.23-7.19                             |
| Oxz <sup>2</sup>    |                                          | 4.10<br>d, J = 3.6                               | 4.73<br>qd, J = 6.6, 3.6                                                     | 1.18<br>d, J = 6.6                                                                       |                                                  |                                                     |
| D-Val <sup>3</sup>  | 7.12<br>d, J = 10.2                      | 5.14<br>dd, J = 10.2, 4.2                        | 2.35<br>m                                                                    | $\gamma$ CH <sub>3</sub> 1.10, $\gamma^1$ CH <sub>3</sub> 1.05<br>d, J = 6.6, d, J = 6.6 |                                                  |                                                     |
| Thz <sup>4or8</sup> |                                          |                                                  |                                                                              |                                                                                          |                                                  | 7.59<br>s                                           |
| Ile <sup>5</sup>    | 7.63<br>d, J = 7.8                       | 4.64<br>dd, J = 9.9, 7.8                         | 2.29<br>m                                                                    | $\gamma$ CH <sub>2</sub> 1.58, 1.31<br>m, m                                              | $\gamma$ CH <sub>3</sub> 0.98<br>d, J = 7.2      | 0.87<br>t, J = 7.2                                  |
| Oxz <sup>6</sup>    |                                          | 4.33<br>d, J = 3.6                               | 4.92<br>qd, J = 6.6, 3.6                                                     | 1.42<br>d, J = 6.6                                                                       |                                                  |                                                     |
| D-Val <sup>7</sup>  | 7.11<br>d, J = 10.2                      | 5.15<br>dd, J = 10.2, 4.2                        | 2.35<br>m                                                                    | $\gamma$ CH <sub>3</sub> 1.10, $\gamma^1$ CH <sub>3</sub> 1.09<br>d, J = 6.6, d, J = 6.6 |                                                  |                                                     |
| Thz <sup>4or8</sup> |                                          |                                                  |                                                                              |                                                                                          |                                                  | 7.60<br>s                                           |

The chemical shifts of Thz<sup>4</sup>H and Thz<sup>8</sup>H were indistinguishable.

Table S11. Chemical shifts of amide and Thz protons of peptide 5 at various temperatures and their temperature coefficients.

| T (K)                              | $\delta$ Phe <sup>1</sup> HN (ppm) | $\delta$ D-Val <sup>3</sup> HN (ppm) | $\delta$ Ile <sup>5</sup> HN (ppm) | $\delta$ D-Val <sup>7</sup> HN (ppm) | $\delta$ Thz <sup>4or8</sup> H (ppm) | $\delta$ Thz <sup>4or8</sup> H (ppm) |
|------------------------------------|------------------------------------|--------------------------------------|------------------------------------|--------------------------------------|--------------------------------------|--------------------------------------|
| 273                                | 7.83                               | 7.11                                 | 7.59                               | 7.09                                 | 7.52                                 | 7.54                                 |
| 283                                | 7.84                               | 7.12                                 | 7.61                               | 7.1                                  | 7.55                                 | 7.56                                 |
| 293                                | 7.85                               | 7.12                                 | 7.62                               | 7.11                                 | 7.58                                 | 7.59                                 |
| 303                                | 7.86                               | 7.13                                 | 7.64                               | 7.12                                 | 7.61                                 | 7.62                                 |
| 313                                | 7.87                               | 7.14                                 | 7.66                               | 7.13                                 | 7.65                                 | 7.66                                 |
| 323                                | 7.88                               |                                      | 7.69                               |                                      | 7.69                                 | 7.69                                 |
| 333                                | 7.90                               |                                      | 7.72                               |                                      | 7.73                                 | 7.73                                 |
| $\Delta\delta/\Delta T$<br>(ppb/K) | 1.1                                | 0.7                                  | 2.1                                | 1.0                                  | 3.5                                  | 3.2                                  |



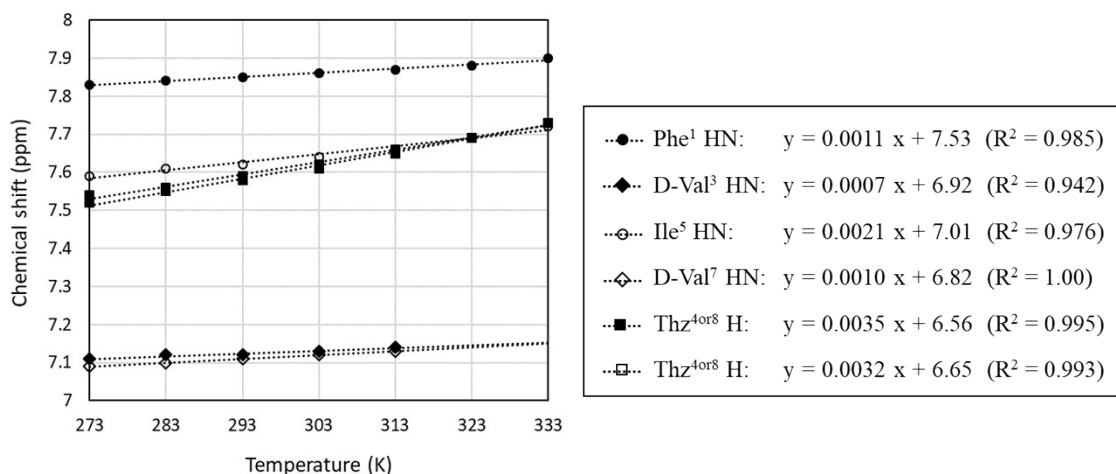

**Fig. S21** Diagrams of the amide and Thz protons temperature coefficients of peptide **5**.

### VT-NMR data for peptide **6**

**Table S12.**  $^1\text{H}$  NMR chemical shifts of peptide **6** (ca. 5mM) in acetonitrile- $d_3$  at 298 K.

| Residue            | $\delta$ HN (ppm)<br>$^3\text{J}$ (Hz) | $\delta$ H $\alpha$ (ppm)<br>$^3\text{J}$ (Hz) | $\delta$ H $\beta$ (ppm)<br>$^3\text{J}$ (Hz) | $\delta$ H $\gamma$ (ppm)<br>$^3\text{J}$ (Hz)                                   | $\delta$ H $\delta$ (ppm)<br>$^3\text{J}$ (Hz) | $\delta$ Other protons (ppm)<br>$^3\text{J}$ (Hz) |
|--------------------|----------------------------------------|------------------------------------------------|-----------------------------------------------|----------------------------------------------------------------------------------|------------------------------------------------|---------------------------------------------------|
| Cha <sup>1</sup>   | 7.68<br>d, J = 6.6                     | 4.83<br>m                                      | 1.98, 1.61<br>m, m                            |                                                                                  |                                                | 1.67-0.82 (10H, cyclohexyl CH <sub>2</sub> )<br>m |
| Oxz <sup>2</sup>   |                                        | 4.30<br>d, J = 3.6                             | 4.81<br>qd, J = 6.6, 3.6                      | 1.40<br>d, J = 6.6                                                               |                                                |                                                   |
| D-Val <sup>3</sup> | 7.20<br>d, J = 10.2                    | 5.16<br>dd, J = 10.2, 4.8                      | 2.34<br>m                                     | $\gamma\text{CH}_3$ 1.11, $\gamma'\text{CH}_3$ 1.07<br>d, J = 6.6, d, J = 6.6    |                                                |                                                   |
| Thz <sup>4</sup>   |                                        |                                                |                                               |                                                                                  |                                                | 7.60<br>s                                         |
| Ile <sup>5</sup>   | 7.66<br>d, J = 7.8                     | 4.61<br>dd, J = 9.3, 7.8                       | 2.12<br>m                                     | $\gamma\text{CH}_2$ 1.54, 1.28<br>m, m<br>$\gamma\text{CH}_3$ 0.92<br>d, J = 7.2 | 0.82<br>t, J = 7.2                             |                                                   |
| Oxz <sup>6</sup>   |                                        | 4.31<br>d, J = 4.2                             | 4.87<br>qd, J = 6.6, 4.2                      | 1.42<br>d, J = 6.6, d, J = 6.6                                                   |                                                |                                                   |
| D-Val <sup>7</sup> | 7.12<br>d, J = 10.2                    | 5.14<br>dd, J = 10.2, 4.8                      | 2.34<br>m                                     | $\gamma\text{CH}_3$ 1.10, $\gamma'\text{CH}_3$ 1.07<br>d, J = 6.6, d, J = 6.6    |                                                |                                                   |
| Thz <sup>8</sup>   |                                        |                                                |                                               |                                                                                  |                                                | 7.60<br>s                                         |

**Table S13.** Chemical shifts of amide and Thz protons of peptide **6** at various temperatures and their temperature coefficients.

| T (K)                              | $\delta$ Cha <sup>1</sup> HN (ppm) | $\delta$ D-Val <sup>3</sup> HN (ppm) | $\delta$ Ile <sup>5</sup> HN (ppm) | $\delta$ D-Val <sup>7</sup> HN (ppm) | $\delta$ Thz <sup>4,8</sup> H (ppm) |
|------------------------------------|------------------------------------|--------------------------------------|------------------------------------|--------------------------------------|-------------------------------------|
| 273                                | 7.65                               | 7.19                                 | 7.61                               | 7.09                                 | 7.52                                |
| 283                                | 7.66                               | 7.19                                 | 7.63                               | 7.10                                 | 7.55                                |
| 293                                | 7.67                               | 7.20                                 | 7.65                               | 7.12                                 | 7.58                                |
| 303                                | 7.69                               | 7.21                                 | 7.67                               | 7.13                                 | 7.62                                |
| 313                                | 7.71                               | 7.22                                 | 7.70                               | 7.15                                 | 7.65                                |
| 323                                | 7.74                               | 7.23                                 | 7.73                               | 7.16                                 | 7.69                                |
| 333                                | 7.77                               | 7.24                                 | 7.76                               | 7.18                                 | 7.73                                |
| $\Delta\delta/\Delta T$<br>(ppb/K) | 2.0                                | 0.9                                  | 2.5                                | 1.5                                  | 3.5                                 |

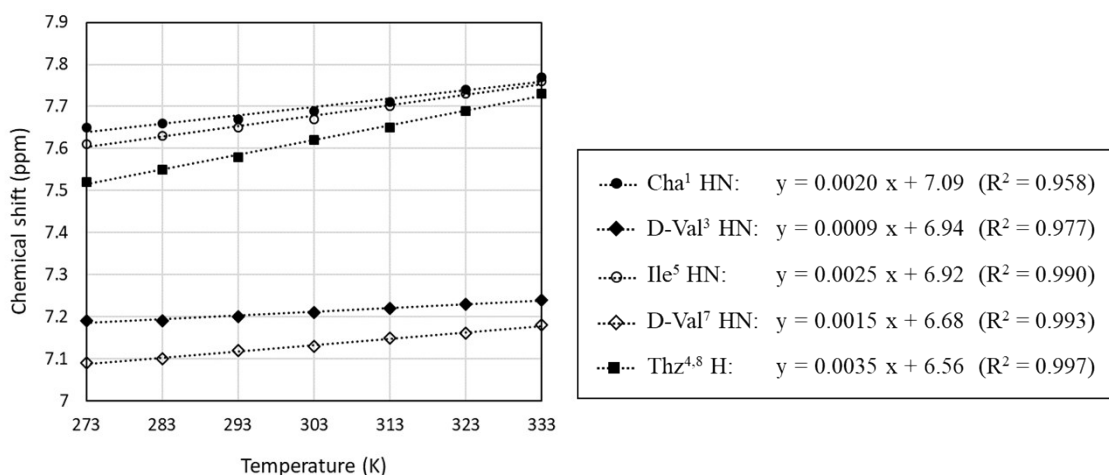

**Fig. S22** Diagrams of the amide and Thz protons temperature coefficients of peptide **6**.

### VT-NMR data for peptide 7

**Table S14.** <sup>1</sup>H NMR chemical shifts of peptide **7** (ca. 5mM) in acetonitrile-*d*<sub>3</sub> at 298 K.

| Residue             | $\delta$ HN (ppm)<br><sup>3</sup> J (Hz) | $\delta$ H $\alpha$ (ppm)<br><sup>3</sup> J (Hz) | $\delta$ H $\beta$ (ppm)<br><sup>3</sup> J (Hz) | $\delta$ H $\gamma$ (ppm)<br><sup>3</sup> J (Hz)                                           | $\delta$ H $\delta$ (ppm)<br><sup>3</sup> J (Hz) | $\delta$ Other protons (ppm)<br><sup>3</sup> J (Hz) |
|---------------------|------------------------------------------|--------------------------------------------------|-------------------------------------------------|--------------------------------------------------------------------------------------------|--------------------------------------------------|-----------------------------------------------------|
| Phg <sup>1</sup>    | 8.55<br>d, J = 8.4                       | 5.80<br>dd, J = 8.4, 1.2                         |                                                 |                                                                                            |                                                  | Ar 7.20-7.16, 7.05-7.03                             |
| Oxz <sup>2</sup>    |                                          | 4.39<br>dd, J = 6.6, 1.2                         | 4.68<br>m                                       | 1.42<br>d, J = 6.6, d, J = 6.6                                                             |                                                  |                                                     |
| D-Val <sup>3</sup>  | 7.58<br>d, J = 9.6                       | 5.20<br>dd, J = 9.6, 1.2                         | 2.31<br>oct. J = 6.6                            | $\gamma$ CH <sub>3</sub> 1.15, $\gamma'$ CH <sub>3</sub> 0.98<br>d, J = 6.6, d, J = 6.6    |                                                  |                                                     |
| Thz <sup>4or8</sup> |                                          |                                                  |                                                 |                                                                                            |                                                  | 8.12<br>s                                           |
| Ile <sup>5</sup>    | 8.09<br>d, J = 7.8                       | 4.69<br>m                                        | 1.45<br>m                                       | $\gamma$ CH <sub>2</sub> 0.68, 0.98<br>m, m<br>$\gamma$ CH <sub>3</sub> 0.18<br>d, J = 6.6 | 0.37<br>t, J = 7.2                               |                                                     |
| Oxz <sup>6</sup>    |                                          | 4.24<br>dd, J = 6.6, 1.8                         | 4.69<br>m                                       | 1.34<br>d, J = 6.6                                                                         |                                                  |                                                     |
| D-Val <sup>7</sup>  | 7.31<br>d, J = 10.2                      | 5.09<br>dd, J = 10.2, 6.6                        | 2.32<br>oct. J = 6.6                            | $\gamma$ CH <sub>3</sub> 1.12, $\gamma'$ CH <sub>3</sub> 0.95<br>d, J = 6.6, d, J = 6.6    |                                                  |                                                     |
| Thz <sup>4or8</sup> |                                          |                                                  |                                                 |                                                                                            |                                                  | 7.98<br>s                                           |

The chemical shifts of Thz<sup>4</sup>H and Thz<sup>8</sup>H were indistinguishable.

**Table S15.** Chemical shifts of amide and Thz protons of peptide **7** at various temperatures and their

temperature coefficients.

| T (K)                              | $\delta$ Phg <sup>1</sup> HN (ppm) | $\delta$ D-Val <sup>3</sup> HN (ppm) | $\delta$ Ile <sup>5</sup> HN (ppm) | $\delta$ D-Val <sup>7</sup> HN (ppm) | $\delta$ Thz <sup>4or8</sup> H (ppm) | $\delta$ Thz <sup>4or8</sup> H (ppm) |
|------------------------------------|------------------------------------|--------------------------------------|------------------------------------|--------------------------------------|--------------------------------------|--------------------------------------|
| 273                                | 8.58                               | 7.65                                 | 8.12                               | 7.37                                 | 8.12                                 | 7.97                                 |
| 283                                | 8.56                               | 7.62                                 | 8.11                               | 7.34                                 | 8.12                                 | 7.98                                 |
| 293                                | 8.56                               | 7.59                                 | 8.10                               | 7.32                                 | 8.12                                 | 7.98                                 |
| 303                                | 8.55                               | 7.57                                 | 8.09                               | 7.31                                 | 8.12                                 | 7.98                                 |
| 313                                | 8.54                               | 7.55                                 | 8.08                               | 7.30                                 | 8.12                                 | 7.99                                 |
| 323                                | 8.54                               | 7.53                                 | 8.08                               | 7.29                                 | 8.12                                 | 7.99                                 |
| 333                                | 8.54                               | 7.52                                 | 8.08                               | 7.28                                 | 8.12                                 | 7.99                                 |
| $\Delta\delta/\Delta T$<br>(ppb/K) | —*                                 | -2.2                                 | -0.7                               | -1.4                                 | 0.0                                  | —*                                   |

\*The correlation coefficients were less than 0.9.

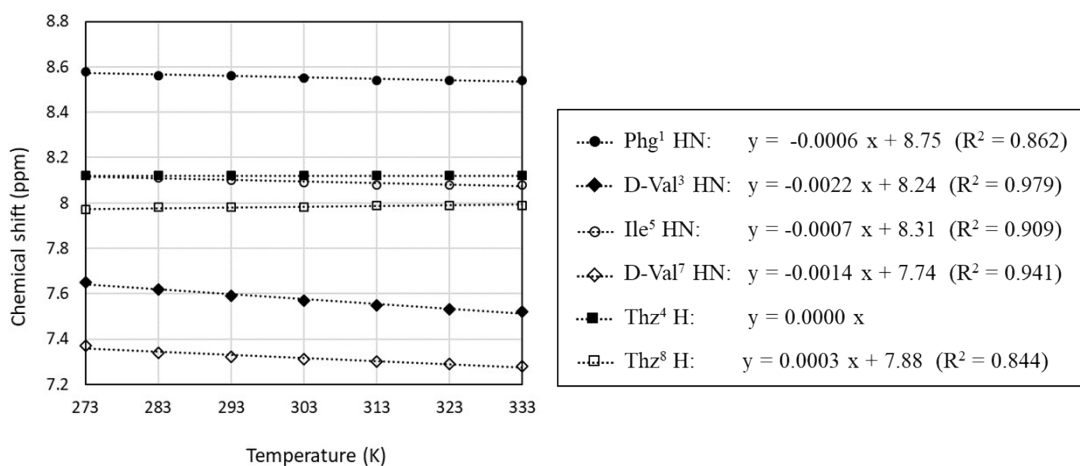

**Fig. S23** Diagrams of the amide and Thz protons temperature coefficients of peptide 7.

### VT-NMR data for peptide 8

**Table S16.** <sup>1</sup>H NMR chemical shifts of peptide 8 (ca. 5mM) in acetonitrile-*d*<sub>3</sub> at 298 K.

| Residue            | $\delta$ HN (ppm)<br><sup>3</sup> J (Hz) | $\delta$ H $\alpha$ (ppm)<br><sup>3</sup> J (Hz) | $\delta$ H $\beta$ (ppm)<br><sup>3</sup> J (Hz) | $\delta$ H $\gamma$ (ppm)<br><sup>3</sup> J (Hz)                                           | $\delta$ H $\delta$ (ppm)<br><sup>3</sup> J (Hz) | $\delta$ Other protons (ppm)<br><sup>3</sup> J (Hz) |
|--------------------|------------------------------------------|--------------------------------------------------|-------------------------------------------------|--------------------------------------------------------------------------------------------|--------------------------------------------------|-----------------------------------------------------|
| Abu <sup>1</sup>   | 7.82<br>d, J = 6.6                       | 4.71<br>q, J = 6.6                               | $\beta$ CH <sub>2</sub> 1.95, 1.79<br>m, m      | 0.78<br>t, J = 7.2                                                                         |                                                  |                                                     |
| Oxz <sup>2</sup>   |                                          | 4.30<br>dd, J = 4.5, 0.6                         | 4.78<br>qd, J = 6.0, 4.5                        | 1.40<br>d, J = 6.0                                                                         |                                                  |                                                     |
| D-Val <sup>3</sup> | 7.22<br>d, J = 10.2                      | 5.16<br>dd, J = 10.2, 6.6                        | 2.34<br>oct. J = 6.6                            | $\gamma$ CH <sub>3</sub> 1.12, $\gamma'$ CH <sub>3</sub> 1.05<br>d, J = 6.6, d, J = 6.6    |                                                  |                                                     |
| Thz <sup>4</sup>   |                                          |                                                  |                                                 |                                                                                            |                                                  | 7.68<br>s                                           |
| Ile <sup>5</sup>   | 7.75<br>d, J = 7.8                       | 4.64<br>t, J = 7.8                               | 2.05<br>m                                       | $\gamma$ CH <sub>2</sub> 1.40, 1.20<br>m, m<br>$\gamma$ CH <sub>3</sub> 0.83<br>d, J = 6.6 | 0.77<br>t, J = 7.2                               |                                                     |
| Oxz <sup>6</sup>   |                                          | 4.29<br>dd, J = 4.8, 0.6                         | 4.87<br>qd, J = 6.6, 4.8                        | 1.41<br>d, J = 6.6                                                                         |                                                  |                                                     |
| D-Val <sup>7</sup> | 7.14<br>d, J = 10.2                      | 5.13<br>dd, J = 10.2, 6.6                        | 2.34<br>oct. J = 6.6                            | $\gamma$ CH <sub>3</sub> 1.11, $\gamma'$ CH <sub>3</sub> 1.05<br>d, J = 6.6, d, J = 6.6    |                                                  |                                                     |
| Thz <sup>8</sup>   |                                          |                                                  |                                                 |                                                                                            |                                                  | 7.68<br>s                                           |

**Table S17.** Chemical shifts of amide and Thz protons of peptide 8 at various temperatures and their temperature coefficients.

| T (K)                              | $\delta$ Abu <sup>1</sup> HN (ppm) | $\delta$ D-Val <sup>3</sup> HN (ppm) | $\delta$ Ile <sup>5</sup> HN (ppm) | $\delta$ D-Val <sup>7</sup> HN (ppm) | $\delta$ Thz <sup>4,8</sup> H (ppm) |
|------------------------------------|------------------------------------|--------------------------------------|------------------------------------|--------------------------------------|-------------------------------------|
| 273                                | 7.78                               | 7.22                                 | 7.70                               | 7.13                                 | 7.61                                |
| 283                                | 7.80                               | 7.22                                 | 7.72                               | 7.14                                 | 7.64                                |
| 293                                | 7.82                               | 7.22                                 | 7.75                               | 7.15                                 | 7.67                                |
| 303                                | 7.84                               | 7.23                                 | 7.77                               | 7.16                                 | 7.71                                |
| 313                                | 7.87                               | 7.23                                 | 7.80                               | 7.17                                 | 7.74                                |
| 323                                | 7.89                               | 7.24                                 | 7.83                               | 7.18                                 | 7.77                                |
| 333                                | 7.91                               | 7.24                                 | 7.86                               | 7.19                                 | 7.81                                |
| $\Delta\delta/\Delta T$<br>(ppb/K) | 2.2                                | —*                                   | 2.7                                | 1.0                                  | 3.3                                 |

\*The correlation coefficient was less than 0.9.

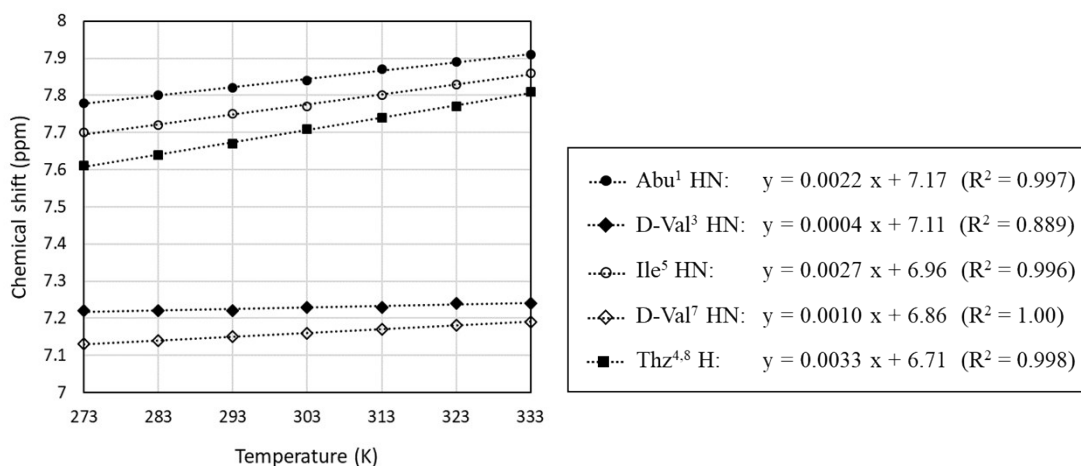

**Fig. S24** Diagrams of the amide and Thz protons temperature coefficients of peptide **8**.

## VT-NMR data for peptide **9**

**Table S18.** <sup>1</sup>H NMR chemical shifts of peptide **9** (ca. 5mM) in acetonitrile-*d*<sub>3</sub> at 298 K.

| Residue               | $\delta$ HN (ppm)<br><sup>3</sup> J (Hz) | $\delta$ H $\alpha$ (ppm)<br><sup>3</sup> J (Hz) | $\delta$ H $\beta$ (ppm)<br><sup>3</sup> J (Hz) | $\delta$ H $\gamma$ (ppm)<br><sup>3</sup> J (Hz)                                        | $\delta$ H $\delta$ (ppm)<br><sup>3</sup> J (Hz) | $\delta$ Other protons (ppm)<br><sup>3</sup> J (Hz) |
|-----------------------|------------------------------------------|--------------------------------------------------|-------------------------------------------------|-----------------------------------------------------------------------------------------|--------------------------------------------------|-----------------------------------------------------|
| Nva <sup>1</sup>      | 7.84<br>d, J = 7.2                       | 4.76<br>q, J = 7.2                               | $\beta$ CH <sub>2</sub> 1.92, 1.72<br>m, m      | $\gamma$ CH <sub>2</sub> 1.27, 1.10<br>m, m                                             | 0.79<br>t, J = 6.6                               |                                                     |
| Oxz <sup>2</sup>      |                                          | 4.30<br>d, J = 4.5                               | 4.80<br>qd, J = 6.0, 4.5                        | 1.40<br>d, J = 6.0                                                                      |                                                  |                                                     |
| D-Val <sup>3or7</sup> | 7.23<br>d, J = 10.2                      | 5.15<br>dd, J = 10.2, 5.4                        | 2.33<br>m                                       | $\gamma$ CH <sub>3</sub> 1.11, $\gamma'$ CH <sub>3</sub> 1.04<br>d, J = 6.0, d, J = 6.0 |                                                  |                                                     |
| Thz <sup>4or8</sup>   |                                          |                                                  |                                                 |                                                                                         |                                                  | 7.70<br>s                                           |
| Ile <sup>5</sup>      | 7.79<br>d, J = 7.8                       | 4.65<br>t, J = 7.8                               | 2.03<br>m                                       | $\gamma$ CH <sub>2</sub> 1.40, 1.19<br>m, m                                             | $\gamma$ CH <sub>3</sub> 0.82<br>d, J = 6.6      | 0.77<br>t, J = 7.2                                  |
| Oxz <sup>6</sup>      |                                          | 4.30<br>d, J = 4.5                               | 4.85<br>qd, J = 6.0, 4.5                        | 1.42<br>d, J = 6.0                                                                      |                                                  |                                                     |
| D-Val <sup>3or7</sup> | 7.16<br>d, J = 10.2                      | 5.13<br>dd, J = 10.2, 5.4                        | 2.35<br>m                                       | $\gamma$ CH <sub>3</sub> 1.10, $\gamma'$ CH <sub>3</sub> 1.04<br>d, J = 6.0, d, J = 6.0 |                                                  |                                                     |
| Thz <sup>4or8</sup>   |                                          |                                                  |                                                 |                                                                                         |                                                  | 7.71<br>s                                           |

The chemical shifts of Thz<sup>4</sup>H and Thz<sup>8</sup>H were indistinguishable.

The chemical shifts of D-Val<sup>3</sup> and D-Val<sup>7</sup> were indistinguishable.

**Table S19.** Chemical shifts of amide and Thz protons of peptide **9** at various temperatures and their temperature coefficients.

| T (K)                           | $\delta$ Nva <sup>1</sup> HN (ppm) | $\delta$ D-Val <sup>3or7</sup> HN (ppm) | $\delta$ Ile <sup>5</sup> HN (ppm) | $\delta$ D-Val <sup>3or7</sup> HN (ppm) | $\delta$ Thz <sup>4or8</sup> H (ppm) | $\delta$ Thz <sup>4or8</sup> H (ppm) |
|---------------------------------|------------------------------------|-----------------------------------------|------------------------------------|-----------------------------------------|--------------------------------------|--------------------------------------|
| 273                             | 7.79                               | 7.23                                    | 7.73                               | 7.14                                    | 7.63                                 | 7.63                                 |
| 283                             | 7.81                               | 7.23                                    | 7.75                               | 7.15                                    | 7.66                                 | 7.66                                 |
| 293                             | 7.83                               | 7.23                                    | 7.78                               | 7.16                                    | 7.69                                 | 7.70                                 |
| 303                             | 7.85                               | 7.24                                    | 7.80                               | 7.17                                    | 7.72                                 | 7.73                                 |
| 313                             | 7.87                               | 7.24                                    | 7.83                               | 7.18                                    | 7.75                                 | 7.76                                 |
| 323                             | 7.89                               | 7.24                                    | 7.85                               | 7.18                                    | 7.78                                 | 7.79                                 |
| 333                             | 7.91                               | 7.25                                    | 7.88                               | 7.20                                    | 7.81                                 | 7.82                                 |
| $\Delta\delta/\Delta T$ (ppb/K) | 2.0                                | —*                                      | 2.5                                | 0.9                                     | 3.0                                  | 3.2                                  |

\*The correlation coefficient was less than 0.9.

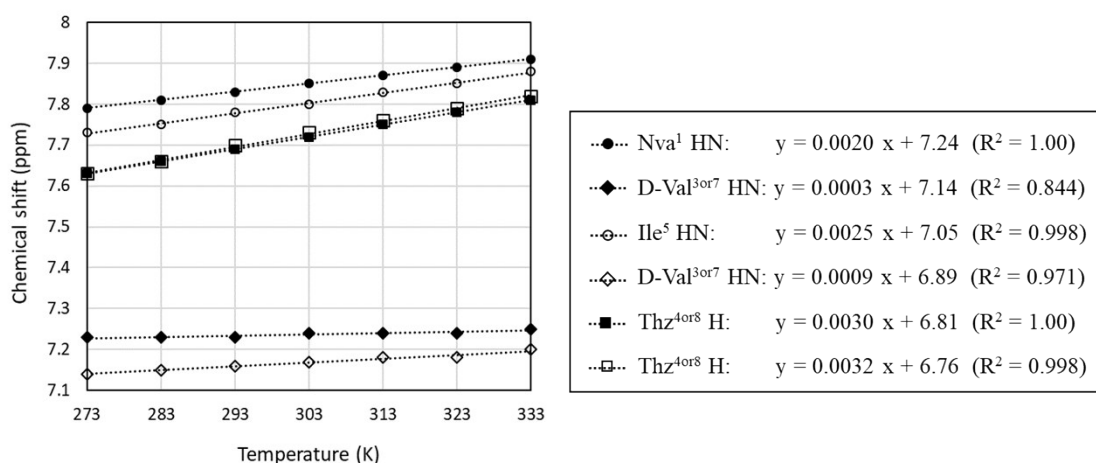

**Fig. S25** Diagrams of the amide and Thz protons temperature coefficients of peptide **9**.

### VT-NMR data for peptide **10**

**Table S20.** <sup>1</sup>H NMR chemical shifts of peptide **10** (ca. 5mM) in acetonitrile-*d*<sub>3</sub> at 298 K.

| Residue            | $\delta$ HN (ppm)<br><sup>3</sup> J (Hz) | $\delta$ H $\alpha$ (ppm)<br><sup>3</sup> J (Hz) | $\delta$ H $\beta$ (ppm)<br><sup>3</sup> J (Hz)                            | $\delta$ H $\gamma$ (ppm)<br><sup>3</sup> J (Hz)                                           | $\delta$ H $\delta$ (ppm)<br><sup>3</sup> J (Hz) | $\delta$ Other protons (ppm)<br><sup>3</sup> J (Hz) |
|--------------------|------------------------------------------|--------------------------------------------------|----------------------------------------------------------------------------|--------------------------------------------------------------------------------------------|--------------------------------------------------|-----------------------------------------------------|
| Tbu <sup>1</sup>   | 7.61<br>d, J = 7.2                       | 4.89<br>ddd, J = 9.6, 7.2, 4.2                   | $\beta$ CH <sub>2</sub> 2.12, 1.63<br>dd, J = 13.8, 9.6, dd, J = 13.8, 4.2 |                                                                                            | 0.97<br>s                                        |                                                     |
| Oxz <sup>2</sup>   |                                          | 4.31<br>d, J = 3.6                               | 4.81<br>qd, J = 6.6, 3.6                                                   | 1.41<br>d, J = 6.6                                                                         |                                                  |                                                     |
| D-Val <sup>3</sup> | 7.17<br>d, J = 10.8                      | 5.15<br>dd, J = 10.8, 3.6                        | 2.37<br>sept.d, J = 6.6, 3.6                                               | $\gamma$ CH <sub>3</sub> 1.12, $\gamma'$ CH <sub>3</sub> 1.09<br>d, J = 6.6, d, J = 6.6    |                                                  |                                                     |
| Thz <sup>4</sup>   |                                          |                                                  |                                                                            |                                                                                            |                                                  | 7.53<br>s                                           |
| Ile <sup>5</sup>   | 7.52<br>d, J = 7.8                       | 4.60<br>dd, J = 10.8, 7.8                        | 2.23<br>m                                                                  | $\gamma$ CH <sub>2</sub> 1.58, 1.32<br>m, m<br>$\gamma$ CH <sub>3</sub> 0.98<br>d, J = 5.4 | 0.85<br>t, J = 7.2                               |                                                     |
| Oxz <sup>6</sup>   |                                          | 4.32<br>d, J = 3.6                               | 4.92<br>qd, J = 6.6, 3.6                                                   | 1.44<br>d, J = 6.6                                                                         |                                                  |                                                     |
| D-Val <sup>7</sup> | 7.08<br>d, J = 10.2                      | 5.13<br>dd, J = 10.2, 3.6                        | 2.36<br>sept.d, J = 6.6, 3.6                                               | $\gamma$ CH <sub>3</sub> 1.09, $\gamma'$ CH <sub>3</sub> 1.09<br>d, J = 6.6, d, J = 6.6    |                                                  |                                                     |
| Thz <sup>8</sup>   |                                          |                                                  |                                                                            |                                                                                            |                                                  | 7.53<br>s                                           |

**Table S21.** Chemical shifts of amide and Thz protons of peptide **10** at various temperatures and their temperature coefficients.

| T (K)                              | $\delta$ Tbu <sup>1</sup> HN (ppm) | $\delta$ D-Val <sup>3</sup> HN (ppm) | $\delta$ Ile <sup>5</sup> HN (ppm) | $\delta$ D-Val <sup>7</sup> HN (ppm) | $\delta$ Thz <sup>4or8</sup> H (ppm) | $\delta$ Thz <sup>4or8</sup> H (ppm) |
|------------------------------------|------------------------------------|--------------------------------------|------------------------------------|--------------------------------------|--------------------------------------|--------------------------------------|
| 273                                | 7.60                               | 7.16                                 | 7.49                               | 7.05                                 | 7.48                                 | 7.48                                 |
| 283                                | 7.60                               | 7.17                                 | 7.5                                | 7.06                                 | 7.50                                 | 7.50                                 |
| 293                                | 7.60                               | 7.17                                 | 7.52                               | 7.07                                 | 7.52                                 | 7.52                                 |
| 303                                | 7.61                               | 7.18                                 | 7.53                               | 7.08                                 | 7.54                                 | 7.55                                 |
| 313                                | 7.62                               | 7.18                                 | 7.56                               | 7.10                                 | 7.57                                 | 7.58                                 |
| 323                                | 7.63                               | 7.19                                 | 7.58                               | 7.12                                 | 7.60                                 | 7.61                                 |
| 333                                | 7.65                               | 7.20                                 | 7.61                               | 7.13                                 | 7.63                                 | 7.64                                 |
| $\Delta\delta/\Delta T$<br>(ppb/K) | —*                                 | 0.6                                  | 2.0                                | 1.4                                  | 2.5                                  | 2.7                                  |

\*The correlation coefficient was less than 0.9.

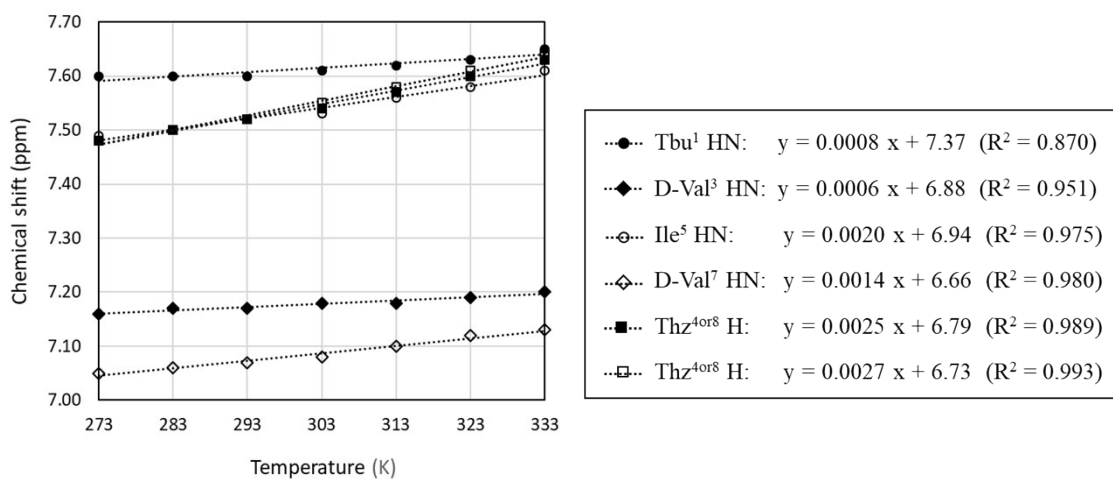

**Fig. S26** Diagrams of the amide and Thz protons temperature coefficients of peptide **10**.

## VT-NMR data for peptide 11

**Table S22.** <sup>1</sup>H NMR chemical shifts of peptide 11 (ca. 5mM) in acetonitrile-*d*<sub>3</sub> at 298 K.

| Residue               | $\delta$ HN (ppm)<br><sup>3</sup> J (Hz) | $\delta$ H $\alpha$ (ppm)<br><sup>3</sup> J (Hz) | $\delta$ H $\beta$ (ppm)<br><sup>3</sup> J (Hz) | $\delta$ H $\gamma$ (ppm)<br><sup>3</sup> J (Hz)                                        | $\delta$ H $\delta$ (ppm)<br><sup>3</sup> J (Hz) | $\delta$ Other protons (ppm)<br><sup>3</sup> J (Hz) |
|-----------------------|------------------------------------------|--------------------------------------------------|-------------------------------------------------|-----------------------------------------------------------------------------------------|--------------------------------------------------|-----------------------------------------------------|
| Chg <sup>1</sup>      | 7.92<br>d, J = 7.8                       | 4.63<br>ddd, J = 7.8, 5.7, 1.2                   | 1.80<br>m                                       |                                                                                         |                                                  | 1.67-0.82 (10H, cyclohexyl CH <sub>2</sub> )<br>m   |
| Oxz <sup>2or6</sup>   |                                          | 4.27<br>dd, J = 6.0, 1.2                         | 4.81<br>quint. J = 6.0                          | 1.41<br>d, J = 6.0                                                                      |                                                  |                                                     |
| D-Val <sup>3or7</sup> | 7.25<br>d, J = 10.2                      | 5.14<br>dd, J = 10.2, 6.6                        | 2.30<br>oct. J = 6.6                            | $\gamma$ CH <sub>3</sub> 1.10, $\gamma'$ CH <sub>3</sub> 0.99<br>d, J = 6.6, d, J = 6.6 |                                                  |                                                     |
| Thz <sup>4</sup>      |                                          |                                                  |                                                 |                                                                                         |                                                  | 7.85<br>s                                           |
| Ile <sup>5</sup>      | 8.01<br>d, J = 7.8                       | 4.69<br>ddd, J = 7.8, 5.4, 1.2                   | 1.94<br>m                                       | $\gamma$ CH <sub>2</sub> 1.35, 1.19<br>m, m                                             | $\gamma$ CH <sub>3</sub> 0.72<br>d, J = 7.2      | 0.76<br>t, J = 7.2                                  |
| Oxz <sup>2or6</sup>   |                                          | 4.28<br>dd, J = 6.0, 1.2                         | 4.81<br>quint. J = 6.0                          | 1.43<br>d, J = 6.0                                                                      |                                                  |                                                     |
| D-Val <sup>3or7</sup> | 7.26<br>d, J = 9.6                       | 5.15<br>dd, J = 9.6, 6.6                         | 2.30<br>oct. J = 6.6                            | $\gamma$ CH <sub>3</sub> 1.10, $\gamma'$ CH <sub>3</sub> 1.00<br>d, J = 6.6, d, J = 6.6 |                                                  |                                                     |
| Thz <sup>8</sup>      |                                          |                                                  |                                                 |                                                                                         |                                                  | 7.85<br>s                                           |

The chemical shifts of Oxz<sup>2</sup> and Oxz<sup>6</sup> were indistinguishable.

The chemical shifts of D-Val<sup>3</sup> and D-Val<sup>7</sup> were indistinguishable.

**Table S23.** Chemical shifts of amide and Thz protons of peptide 11 at various temperatures and their temperature coefficients.

| T (K)                              | $\delta$ Chg <sup>1</sup> HN (ppm) | $\delta$ D-Val <sup>3or7</sup> HN (ppm) | $\delta$ Ile <sup>5</sup> HN (ppm) | $\delta$ D-Val <sup>3or7</sup> HN (ppm) | $\delta$ Thz <sup>4,8</sup> H (ppm) |
|------------------------------------|------------------------------------|-----------------------------------------|------------------------------------|-----------------------------------------|-------------------------------------|
| 273                                |                                    | 7.25                                    | 7.95                               | 7.25                                    | 7.80                                |
| 283                                | 7.87                               | 7.25                                    | 7.97                               | 7.25                                    | 7.82                                |
| 293                                | 7.90                               | 7.25                                    | 8.00                               | 7.26                                    | 7.84                                |
| 303                                | 7.93                               | 7.25                                    | 8.02                               | 7.26                                    | 7.87                                |
| 313                                | 7.95                               | 7.26                                    | 8.04                               | 7.27                                    | 7.89                                |
| 323                                | 7.98                               | 7.26                                    | 8.06                               | 7.27                                    | 7.90                                |
| 333                                | 7.99                               | 7.26                                    | 8.07                               | 7.28                                    | 7.92                                |
| $\Delta\delta/\Delta T$<br>(ppb/K) | 2.5                                | —*                                      | 2.1                                | 0.5                                     | 2.0                                 |

\*The correlation coefficient was less than 0.9.

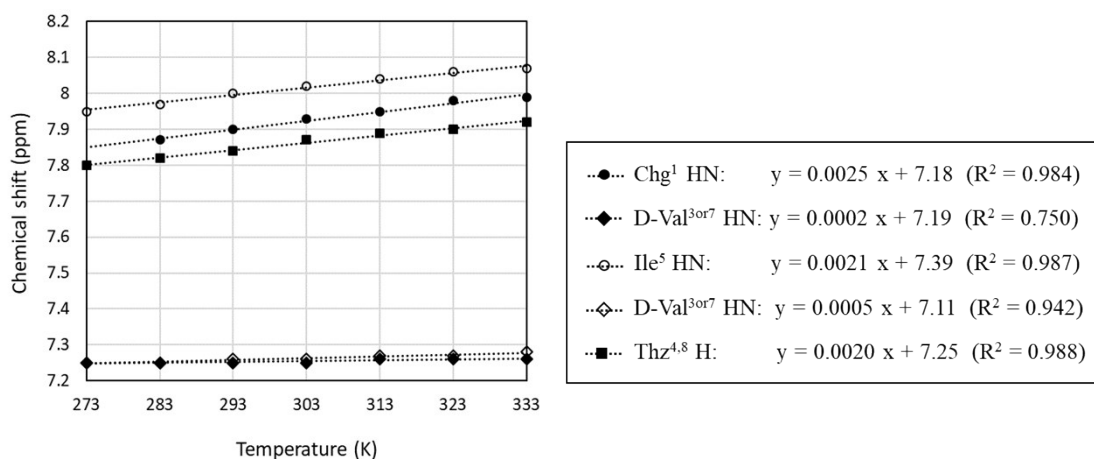

**Fig. S27** Diagrams of the amide and Thz protons temperature coefficients of peptide 11.

## VT-NMR data for peptide 12

**Table S24.**  $^1\text{H}$  NMR chemical shifts of peptide **12** (ca. 5mM) in acetonitrile- $d_3$  at 298 K.

| Residue             | $\delta$ HN (ppm)<br>$^3J$ (Hz) | $\delta$ H $\alpha$ (ppm)<br>$^3J$ (Hz) | $\delta$ H $\beta$ (ppm)<br>$^3J$ (Hz) | $\delta$ H $\gamma$ (ppm)<br>$^3J$ (Hz)                                          | $\delta$ H $\delta$ (ppm)<br>$^3J$ (Hz) | $\delta$ Other protons (ppm)<br>$^3J$ (Hz) |
|---------------------|---------------------------------|-----------------------------------------|----------------------------------------|----------------------------------------------------------------------------------|-----------------------------------------|--------------------------------------------|
| Tle <sup>1</sup>    | 8.22<br>d, J = 9.0              | 4.48<br>dd, J = 9.0, 1.8                |                                        | 0.76<br>s                                                                        |                                         |                                            |
| Oxz <sup>2</sup>    |                                 | 4.25<br>dd, J = 6.0, 1.8                | 4.83<br>quint, J = 6.0                 | 1.41<br>d, J = 6.0                                                               |                                         |                                            |
| D-Val <sup>3</sup>  | 7.40<br>d, J = 9.6              | 5.11<br>dd, J = 9.6, 7.8                | 2.26<br>m                              | $\gamma\text{CH}_3$ 1.09, $\gamma'\text{CH}_3$ 0.94<br>d, J = 6.6, d, J = 6.6    |                                         |                                            |
| Thz <sup>4or8</sup> |                                 |                                         |                                        |                                                                                  |                                         | 8.00<br>s                                  |
| Ile <sup>5</sup>    | 8.14<br>d, J = 7.8              | 4.75<br>ddd, J = 7.8, 3.6, 1.8          | 1.82<br>m                              | $\gamma\text{CH}_2$ 1.18, 1.10<br>m, m<br>$\gamma\text{CH}_3$ 0.70<br>d, J = 6.6 | 0.61<br>t, J = 7.2                      |                                            |
| Oxz <sup>6</sup>    |                                 | 4.28<br>dd, J = 6.0, 1.8                | 4.81<br>quint, J = 6.0                 | 1.42<br>d, J = 6.0                                                               |                                         |                                            |
| D-Val <sup>7</sup>  | 7.41<br>d, J = 10.2             | 5.21<br>dd, J = 10.2, 7.2               | 2.23<br>m                              | $\gamma\text{CH}_3$ 1.08, $\gamma'\text{CH}_3$ 0.97<br>d, J = 6.6, d, J = 6.6    |                                         |                                            |
| Thz <sup>4or8</sup> |                                 |                                         |                                        |                                                                                  |                                         | 8.01<br>s                                  |

The chemical shifts of Thz<sup>4</sup>H and Thz<sup>8</sup>H were indistinguishable.

**Table S25.** Chemical shifts of amide and Thz protons of peptide **12** at various temperatures and their temperature coefficients.

| T (K)                              | Tle <sup>1</sup> HN (ppm) | D-Val <sup>3</sup> HN (ppm) | Ile <sup>5</sup> HN (ppm) | D-Val <sup>7</sup> HN (ppm) | Thz <sup>4,8</sup> H (ppm) | Thz <sup>4,8</sup> H (ppm) |
|------------------------------------|---------------------------|-----------------------------|---------------------------|-----------------------------|----------------------------|----------------------------|
| 273                                | 8.22                      | 7.44                        | 8.14                      | 7.42                        | 7.99                       | 8.01                       |
| 283                                | 8.22                      | 7.42                        | 8.14                      | 7.41                        | 8.00                       | 8.01                       |
| 293                                | 8.23                      | 7.41                        | 8.14                      | 7.40                        | 8.00                       | 8.01                       |
| 303                                | 8.23                      | 7.41                        | 8.14                      | 7.39                        | 8.00                       | 8.01                       |
| 313                                | 8.23                      | 7.40                        | 8.15                      | 7.39                        | 8.00                       | 8.01                       |
| 323                                | 8.23                      | 7.40                        | 8.15                      | 7.38                        | 8.00                       | 8.01                       |
| 333                                | 8.23                      | 7.40                        | 8.15                      | 7.39                        | 8.00                       | 8.02                       |
| $\Delta\delta/\Delta T$<br>(ppb/K) | 0.0                       | —*                          | 0.0                       | —*                          | 0.0                        | 0.0                        |

\*The correlation coefficients were less than 0.9.

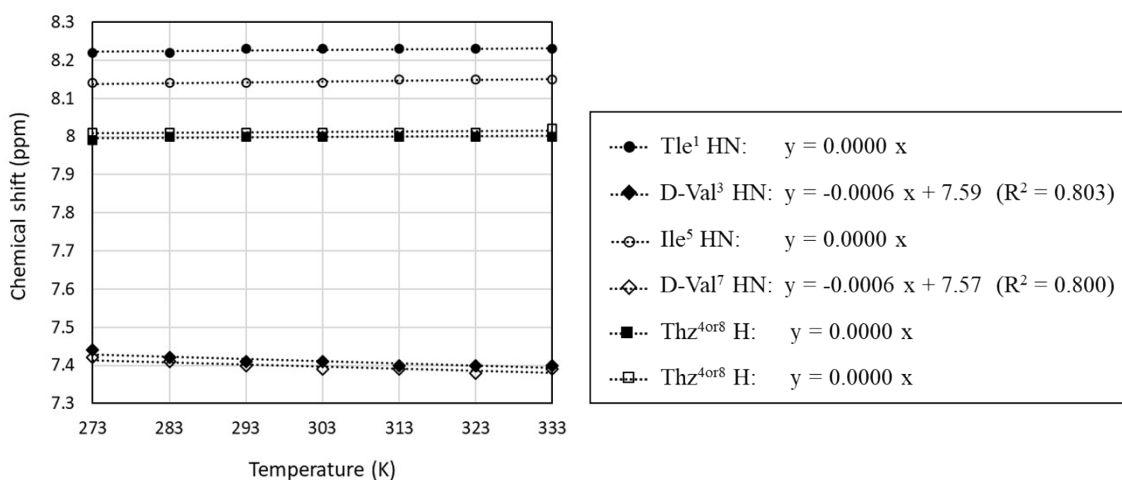

**Fig. S28** Diagrams of the amide and Thz protons temperature coefficients of peptide **12**.



## VT-NMR data for T3ASC

**Table S26.**  $^1\text{H}$  NMR chemical shifts of T3ASC (ca. 5mM) in acetonitrile- $d_3$  at 298 K.

| Residue            | $\delta$ HN (ppm)<br>$^3\text{J}$ (Hz) | $\delta$ H $\alpha$ (ppm)<br>$^3\text{J}$ (Hz) | $\delta$ H $\beta$ (ppm)<br>$^3\text{J}$ (Hz) | $\delta$ H $\gamma$ (ppm)<br>$^3\text{J}$ (Hz)                                   | $\delta$ H $\delta$ (ppm)<br>$^3\text{J}$ (Hz) | $\delta$ Other protons (ppm)<br>$^3\text{J}$ (Hz) |
|--------------------|----------------------------------------|------------------------------------------------|-----------------------------------------------|----------------------------------------------------------------------------------|------------------------------------------------|---------------------------------------------------|
| Ile <sup>1</sup>   | 8.05<br>d, J = 9.0                     | 4.86<br>ddd, J = 9.0, 3.3, 1.8                 | 1.87<br>m                                     | $\gamma\text{CH}_2$ 1.18, 1.13<br>m, m<br>$\gamma\text{CH}_3$ 0.86<br>d, J = 6.6 | 0.66<br>t, J = 7.2                             |                                                   |
| Oxz <sup>2</sup>   |                                        | 4.23<br>dd, J = 6.6, 1.8                       | 4.71<br>quint. J = 6.6                        | 1.45<br>d, J = 6.6                                                               |                                                |                                                   |
| D-Val <sup>3</sup> | 7.20<br>d, J = 10.2                    | 5.08<br>dd, J = 10.2, 8.4                      | 2.19<br>m                                     | $\gamma\text{CH}_3$ 1.02, $\gamma'\text{CH}_3$ 0.81<br>d, J = 6.6, d, J = 6.6    |                                                |                                                   |
| Thz <sup>4</sup>   |                                        |                                                |                                               |                                                                                  |                                                | 8.09<br>s                                         |
| Ile <sup>5</sup>   | 8.14<br>d, J = 7.8                     | 5.38<br>dd, J = 7.8, 6.6                       | 2.01<br>m                                     | $\gamma\text{CH}_2$ 1.53, 1.17<br>m, m<br>$\gamma\text{CH}_3$ 0.73<br>d, J = 6.6 | 0.92<br>t, J = 7.2                             |                                                   |
| Thz <sup>6</sup>   |                                        | 4.28<br>dd, J = 6.0, 1.2                       | 4.80<br>quint. J = 6.0                        | 1.42<br>d, J = 6.0                                                               |                                                | 8.08<br>s                                         |
| D-Val <sup>7</sup> | 8.23<br>d, J = 9.0                     | 5.35<br>dd, J = 9.0, 6.6                       | 2.29<br>oct. J = 6.6                          | $\gamma\text{CH}_3$ 1.09, $\gamma'\text{CH}_3$ 1.02<br>d, J = 6.6, d, J = 6.6    |                                                | 8.09                                              |
| Thz <sup>8</sup>   |                                        |                                                |                                               |                                                                                  |                                                | 7.87<br>s                                         |

**Table S27.** Chemical shifts of amide and Thz protons of T3ASC at various temperatures and their temperature coefficients.

| T (K)                              | $\delta$ Ile <sup>1</sup> HN (ppm) | $\delta$ D-Val <sup>3</sup> HN (ppm) | $\delta$ Ile <sup>5</sup> HN (ppm) | $\delta$ D-Val <sup>7</sup> HN (ppm) | $\delta$ Thz <sup>4,8</sup> H (ppm) | $\delta$ Thz <sup>6</sup> H (ppm) |
|------------------------------------|------------------------------------|--------------------------------------|------------------------------------|--------------------------------------|-------------------------------------|-----------------------------------|
| 273                                | 8.06                               | 7.23                                 | 8.14                               | 8.27                                 | 8.09                                | 8.08                              |
| 283                                | 8.06                               | 7.22                                 | 8.14                               | 8.25                                 | 8.09                                | 8.08                              |
| 293                                | 8.05                               | 7.21                                 | 8.14                               | 8.23                                 | 8.09                                | 8.08                              |
| 303                                | 8.05                               | 7.21                                 | 8.14                               | 8.24                                 | 8.09                                | 8.08                              |
| 313                                | 8.05                               | 7.20                                 | 8.14                               | 8.22                                 | 8.09                                | 8.08                              |
| 323                                | 8.05                               | 7.20                                 | 8.14                               | 8.21                                 | 8.09                                | 8.08                              |
| 333                                | 8.05                               | 7.21                                 | 8.13                               | 8.21                                 | 8.09                                | 8.08                              |
| $\Delta\delta/\Delta T$<br>(ppb/K) | 0.0                                | —*                                   | 0.0                                | —*                                   | 0.0                                 | 0.0                               |

\*The correlation coefficients were less than 0.9.

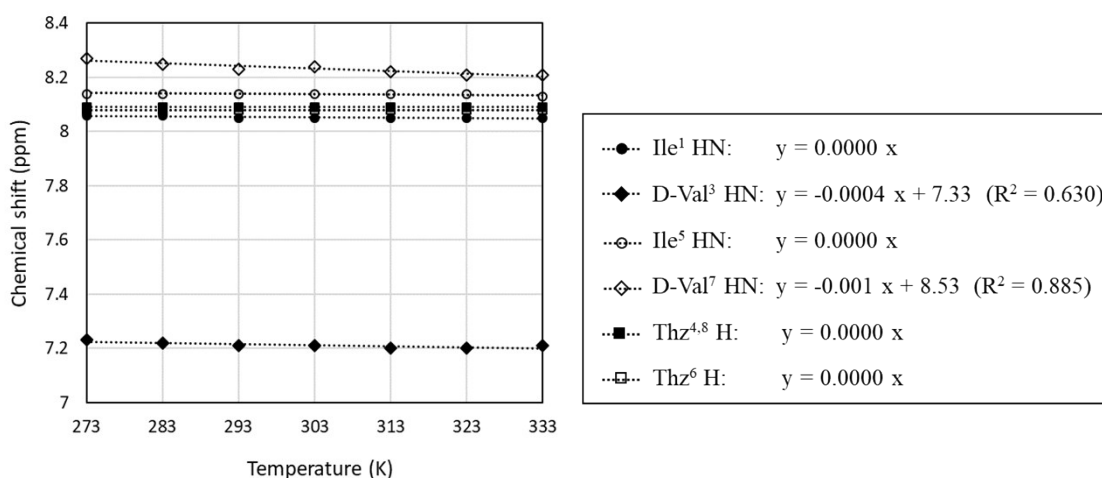

**Fig. S29** Diagrams of the amide and Thz protons temperature coefficients of T3ASC.

## VT-NMR data for *d*ASC

**Table S28.** <sup>1</sup>H NMR chemical shifts of *d*ASC (ca. 5mM) in acetonitrile-*d*<sub>3</sub> at 298 K.

| Residue            | δ HN (ppm)<br><sup>3</sup> J (Hz) | δ H <sub>α</sub> (ppm)<br><sup>3</sup> J (Hz) | δ H <sub>β</sub> (ppm)<br><sup>3</sup> J (Hz) | δ H <sub>γ</sub> (ppm)<br><sup>3</sup> J (Hz)                              | δ H <sub>δ</sub> (ppm)<br><sup>3</sup> J (Hz) | δ Other protons (ppm)<br><sup>3</sup> J (Hz) |
|--------------------|-----------------------------------|-----------------------------------------------|-----------------------------------------------|----------------------------------------------------------------------------|-----------------------------------------------|----------------------------------------------|
| Ile <sup>1</sup>   | 9.25<br>d, J = 5.4                | 3.83<br>dd, J = 10.8, 5.4                     | 2.34<br>m                                     | γCH <sub>2</sub> 1.72, 1.16<br>m, m<br>γCH <sub>3</sub> 0.98<br>d, J = 7.2 | 0.88<br>t, J = 7.2                            |                                              |
| aThr <sup>2</sup>  | 7.76<br>d, J = 7.2                | 3.49<br>t, J = 7.2                            | 4.66<br>quint. J = 7.2                        | 1.17<br>d, J = 7.2                                                         |                                               |                                              |
| D-Val <sup>3</sup> | 7.82<br>d, J = 9.6                | 5.33<br>t, J = 9.6                            | 2.37<br>m                                     | γCH <sub>3</sub> 1.14, γ'CH <sub>3</sub> 1.08<br>d, J = 6.0, d, J = 6.0    |                                               |                                              |
| Thz <sup>4</sup>   |                                   |                                               |                                               |                                                                            |                                               | 7.37<br>s                                    |
| Ile <sup>5</sup>   | 9.25<br>d, J = 5.4                | 3.83<br>dd, J = 10.8, 5.4                     | 2.34<br>m                                     | γCH <sub>2</sub> 1.72, 1.16<br>m, m<br>γCH <sub>3</sub> 0.98<br>d, J = 7.2 | 0.88<br>t, J = 7.2                            |                                              |
| aThr <sup>6</sup>  | 7.76<br>d, J = 7.2                | 3.49<br>t, J = 7.2                            | 4.66<br>quint. J = 7.2                        | 1.17<br>d, J = 7.2                                                         |                                               |                                              |
| D-Val <sup>7</sup> | 7.82<br>d, J = 9.6                | 5.33<br>t, J = 9.6                            | 2.37<br>m                                     | γCH <sub>3</sub> 1.14, γ'CH <sub>3</sub> 1.08<br>d, J = 6.0, d, J = 6.0    |                                               |                                              |
| Thz <sup>8</sup>   |                                   |                                               |                                               |                                                                            |                                               | 7.37<br>s                                    |

**Table S29.** Chemical shifts of amide and Thz protons of *d*ASC at various temperatures and their temperature coefficients.

| T (K)         | δ Ile <sup>1,5</sup> HN (ppm) | δ aThr <sup>2,6</sup> HN (ppm) | δ D-Val <sup>3,7</sup> HN (ppm) | δ Thz <sup>4,8</sup> H (ppm) |
|---------------|-------------------------------|--------------------------------|---------------------------------|------------------------------|
| 273           | 9.27                          | 7.85                           | 7.85                            | 7.35                         |
| 283           | 9.26                          | 7.82                           | 7.84                            | 7.36                         |
| 293           | 9.25                          | 7.80                           | 7.83                            | 7.37                         |
| 303           | 9.24                          | 7.78                           | 7.81                            | 7.38                         |
| 313           | 9.23                          | 7.75                           | 7.80                            | 7.39                         |
| 323           | 9.22                          | 7.73                           | 7.79                            | 7.41                         |
| 333           | 9.20                          | 7.71                           | 7.77                            | 7.43                         |
| Δδ/ΔT (ppb/K) | -1.1                          | -2.3                           | -1.3                            | 1.3                          |

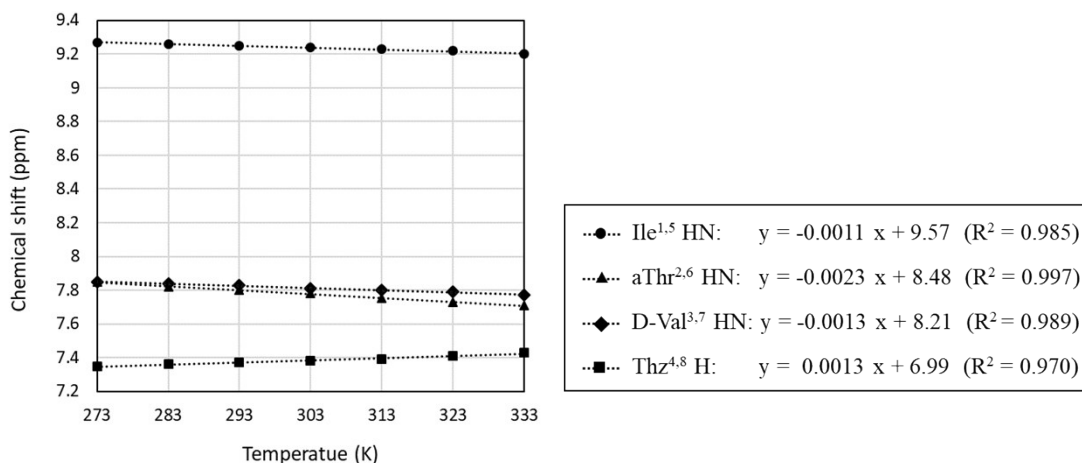

**Fig. S30** Diagrams of the amide and Thz protons temperature coefficients of *d*ASC.

## Thermodynamic parameters and van't Hoff plot of peptide 1

**Table S30.** Equilibrium parameters of peptide 1.

| $T$ (K) | $\delta_{\text{obs}}$ Thz <sup>4,8</sup> H (ppm) | $K^*$ | $\Delta G^{\circ}$ (J $\cdot$ mol <sup>-1</sup> )** |
|---------|--------------------------------------------------|-------|-----------------------------------------------------|
| 273     | 7.82                                             | 0.574 | 1258                                                |
| 283     | 7.84                                             | 0.510 | 1583                                                |
| 293     | 7.86                                             | 0.451 | 1940                                                |
| 303     | 7.88                                             | 0.396 | 2332                                                |
| 313     | 7.90                                             | 0.345 | 2766                                                |
| 323     | 7.92                                             | 0.298 | 3249                                                |
| 333     | 7.93                                             | 0.276 | 3566                                                |

\*Equilibrium constants were calculated from the values of the chemical shifts of Thz<sup>4</sup> and Thz<sup>8</sup> protons:  $K = (\delta_s - \delta_{\text{obs}}) / (\delta_{\text{obs}} - \delta_f)$ .  $\delta_s$  (8.09 ppm) is the chemical shift for Thz proton of T3ASC.  $\delta_f$  (7.35 ppm) is chemical shift for Thz proton of *d*ASC at 273 K.

\*\* $\Delta G^{\circ} = -RT \ln K$

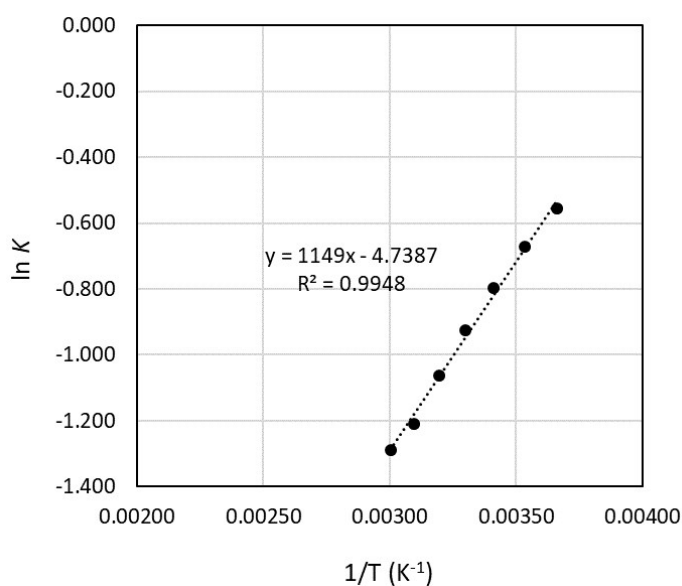

**Fig. S31** van't Hoff plot of peptide 1.

**Table S31.** Thermodynamic parameters of peptide 1.

| $\Delta H^{\circ}$ (kJ $\cdot$ mol <sup>-1</sup> ) | $\Delta S^{\circ}$ (J $\cdot$ mol <sup>-1</sup> ) | $\Delta G^{\circ}_{298\text{K}}$ (kJ $\cdot$ mol <sup>-1</sup> )* |
|----------------------------------------------------|---------------------------------------------------|-------------------------------------------------------------------|
| -9.55                                              | -39.40                                            | 2.19                                                              |

\* $\Delta G^{\circ} = \Delta H^{\circ} - T\Delta S^{\circ}$

## Thermodynamic parameters and van't Hoff plot of peptide 2

**Table S32.** Equilibrium parameters of peptide 2.

| $T$ (K) | $\delta_{\text{obs}}$ Thz <sup>4,8</sup> H (ppm) | $K^*$ | $\Delta G^{\circ}$ (J $\cdot$ mol <sup>-1</sup> )** |
|---------|--------------------------------------------------|-------|-----------------------------------------------------|
| 273     | 7.55                                             | 2.700 | -2254                                               |
| 283     | 7.58                                             | 2.217 | -1874                                               |
| 293     | 7.62                                             | 1.741 | -1350                                               |
| 303     | 7.66                                             | 1.387 | -824                                                |
| 313     | 7.70                                             | 1.114 | -282                                                |
| 323     | 7.74                                             | 0.897 | 291                                                 |
| 333     | 7.78                                             | 0.721 | 906                                                 |

\*Equilibrium constants were calculated from the values of the chemical shifts of Thz<sup>4</sup> and Thz<sup>8</sup> protons:  $K = (\delta_s - \delta_{\text{obs}}) / (\delta_{\text{obs}} - \delta_f)$ .  $\delta_s$  (8.09 ppm) is the chemical shift for Thz proton of T3ASC.  $\delta_f$  (7.35 ppm) is chemical shift for Thz proton of *d*ASC at 273 K.

\*\* $\Delta G^{\circ} = -RT \ln K$

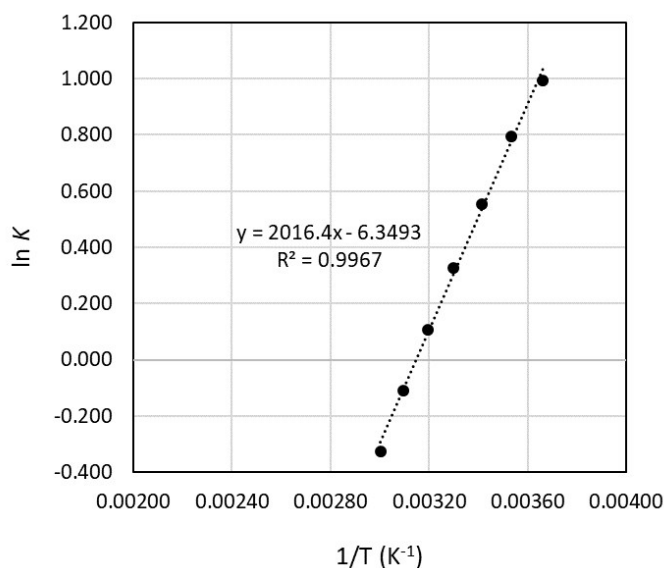

**Fig. S32** van't Hoff plot of peptide 2.

**Table S33.** Thermodynamic parameters of peptide 2.

| $\Delta H^{\circ}$ (kJ $\cdot$ mol <sup>-1</sup> ) | $\Delta S^{\circ}$ (J $\cdot$ mol <sup>-1</sup> ) | $\Delta G^{\circ}_{298\text{K}}$ (kJ $\cdot$ mol <sup>-1</sup> )* |
|----------------------------------------------------|---------------------------------------------------|-------------------------------------------------------------------|
| -16.76                                             | -52.79                                            | -1.03                                                             |

\* $\Delta G^{\circ} = \Delta H^{\circ} - T\Delta S^{\circ}$

## Thermodynamic parameters and van't Hoff plots of peptide 3

**Table S34.** Equilibrium parameters of peptide 3.

| $T$ (K) | $\delta_{\text{obs}} \text{Thz}^{4\text{or}8} \text{H}$ (ppm) | $K^*$ | $\Delta G^\circ$ ( $\text{J}\cdot\text{mol}^{-1}$ )** | $T$ (K) | $\delta_{\text{obs}} \text{Thz}^{4\text{or}8} \text{H}$ (ppm) | $K^*$ | $\Delta G^\circ$ ( $\text{J}\cdot\text{mol}^{-1}$ )** |
|---------|---------------------------------------------------------------|-------|-------------------------------------------------------|---------|---------------------------------------------------------------|-------|-------------------------------------------------------|
| 273     | 7.70                                                          | 1.114 | -246                                                  | 273     | 7.70                                                          | 1.114 | -246                                                  |
| 283     | 7.73                                                          | 0.947 | 127                                                   | 283     | 7.74                                                          | 0.897 | 255                                                   |
| 293     | 7.76                                                          | 0.805 | 529                                                   | 293     | 7.78                                                          | 0.721 | 797                                                   |
| 303     | 7.80                                                          | 0.644 | 1107                                                  | 303     | 7.81                                                          | 0.609 | 1251                                                  |
| 313     | 7.82                                                          | 0.574 | 1442                                                  | 313     | 7.84                                                          | 0.510 | 1751                                                  |
| 323     | 7.85                                                          | 0.480 | 1971                                                  | 323     | 7.86                                                          | 0.451 | 2138                                                  |
| 333     | 7.87                                                          | 0.423 | 2382                                                  | 333     | 7.89                                                          | 0.370 | 2750                                                  |

\*Equilibrium constants were calculated from the values of the chemical shifts of Thz<sup>4</sup> and Thz<sup>8</sup> protons:  $K = (\delta_s - \delta_{\text{obs}}) / (\delta_{\text{obs}} - \delta_f)$ .  $\delta_s$  (8.09 ppm) is the chemical shift for Thz proton of T3ASC.  $\delta_f$  (7.35 ppm) is chemical shift for Thz proton of dASC at 273 K.

\*\* $\Delta G^\circ = -RT \ln K$

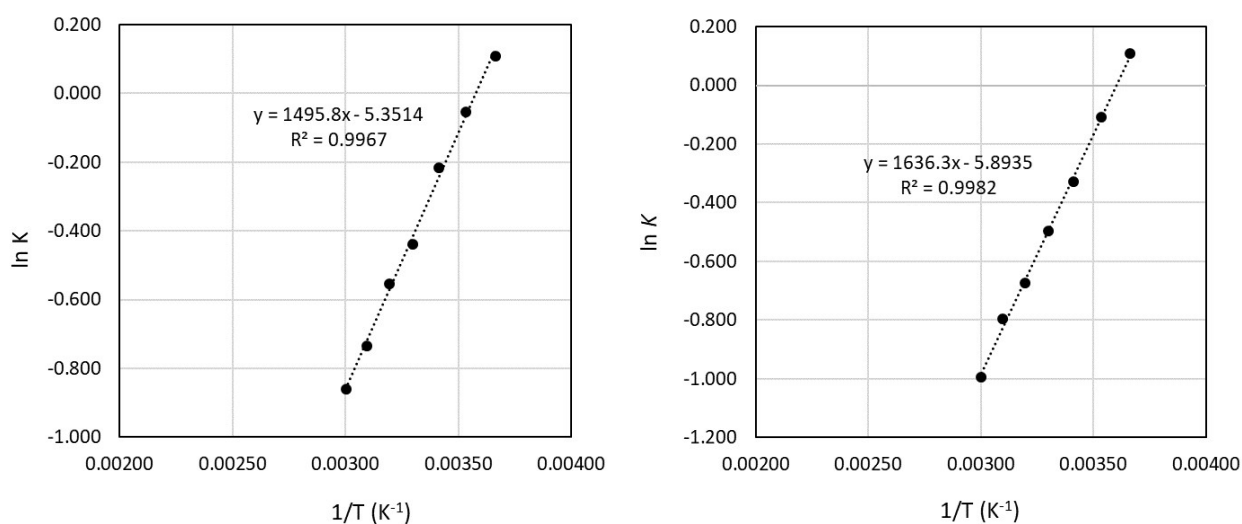

**Fig. S33** van't Hoff plots of peptide 3.

**Table S35.** Thermodynamic parameters of peptide 3.

| $\Delta H^\circ$ ( $\text{kJ}\cdot\text{mol}^{-1}$ ) | $\Delta S^\circ$ ( $\text{J}\cdot\text{mol}^{-1}$ ) | $\Delta G^\circ_{298\text{K}}$ ( $\text{kJ}\cdot\text{mol}^{-1}$ )* | $\Delta H^\circ$ ( $\text{kJ}\cdot\text{mol}^{-1}$ ) | $\Delta S^\circ$ ( $\text{J}\cdot\text{mol}^{-1}$ ) | $\Delta G^\circ_{298\text{K}}$ ( $\text{kJ}\cdot\text{mol}^{-1}$ )* |
|------------------------------------------------------|-----------------------------------------------------|---------------------------------------------------------------------|------------------------------------------------------|-----------------------------------------------------|---------------------------------------------------------------------|
| -12.44                                               | -44.49                                              | 0.82                                                                | -13.60                                               | -49.00                                              | 1.00                                                                |

\* $\Delta G^\circ = \Delta H^\circ - T\Delta S^\circ$

## Thermodynamic parameters and van't Hoff plot of peptide 4

**Table S36.** Equilibrium parameters of peptide 4.

| $T$ (K) | $\delta_{\text{obs}} \text{Thz}^{4,8} \text{H}$ (ppm) | $K^*$ | $\Delta G^\circ$ ( $\text{J}\cdot\text{mol}^{-1}$ )** |
|---------|-------------------------------------------------------|-------|-------------------------------------------------------|
| 273     | 7.53                                                  | 3.111 | -2576                                                 |
| 283     | 7.56                                                  | 2.524 | -2178                                                 |
| 293     | 7.59                                                  | 2.083 | -1788                                                 |
| 303     | 7.62                                                  | 1.741 | -1396                                                 |
| 313     | 7.66                                                  | 1.387 | -852                                                  |
| 323     | 7.69                                                  | 1.176 | -436                                                  |
| 333     | 7.73                                                  | 0.947 | 150                                                   |

\*Equilibrium constants were calculated from the values of the chemical shifts of Thz<sup>4</sup> and Thz<sup>8</sup> protons:  $K = (\delta_s - \delta_{\text{obs}}) / (\delta_{\text{obs}} - \delta_f)$ .  $\delta_s$  (8.09 ppm) is the chemical shift for Thz proton of T3ASC.  $\delta_f$  (7.35 ppm) is chemical shift for Thz proton of *d*ASC at 273 K.

\*\* $\Delta G^\circ = -RT \ln K$

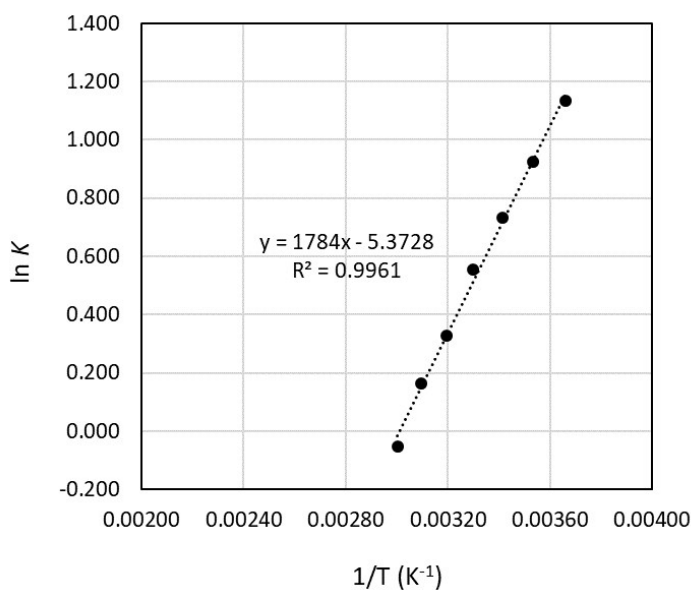

**Fig. S34** van't Hoff plot of peptide 4.

**Table S37.** Thermodynamic parameters of peptide 4.

| $\Delta H^\circ$ ( $\text{kJ}\cdot\text{mol}^{-1}$ ) | $\Delta S^\circ$ ( $\text{J}\cdot\text{mol}^{-1}$ ) | $\Delta G^\circ_{298\text{K}}$ ( $\text{kJ}\cdot\text{mol}^{-1}$ )* |
|------------------------------------------------------|-----------------------------------------------------|---------------------------------------------------------------------|
| -14.83                                               | -44.67                                              | -1.52                                                               |

\* $\Delta G^\circ = \Delta H^\circ - T\Delta S^\circ$

## Thermodynamic parameters and van't Hoff plots of peptide 5

**Table S38.** Equilibrium parameters of peptide 5.

| $T$ (K) | $\delta_{\text{obs}} \text{Thz}^{4\text{or}8} \text{H}$ (ppm) | $K^*$ | $\Delta G^\circ$ ( $\text{J}\cdot\text{mol}^{-1}$ )** | $T$ (K) | $\delta_{\text{obs}} \text{Thz}^{4\text{or}8} \text{H}$ (ppm) | $K^*$ | $\Delta G^\circ$ ( $\text{J}\cdot\text{mol}^{-1}$ )** |
|---------|---------------------------------------------------------------|-------|-------------------------------------------------------|---------|---------------------------------------------------------------|-------|-------------------------------------------------------|
| 273     | 7.52                                                          | 3.353 | -2746                                                 | 273     | 7.54                                                          | 2.895 | -2412                                                 |
| 283     | 7.55                                                          | 2.700 | -2337                                                 | 283     | 7.56                                                          | 2.524 | -2178                                                 |
| 293     | 7.58                                                          | 2.217 | -1940                                                 | 293     | 7.59                                                          | 2.083 | -1788                                                 |
| 303     | 7.61                                                          | 1.846 | -1544                                                 | 303     | 7.62                                                          | 1.741 | -1396                                                 |
| 313     | 7.65                                                          | 1.467 | -997                                                  | 313     | 7.66                                                          | 1.387 | -852                                                  |
| 323     | 7.69                                                          | 1.176 | -436                                                  | 323     | 7.69                                                          | 1.176 | -436                                                  |
| 333     | 7.73                                                          | 0.947 | 150                                                   | 333     | 7.73                                                          | 0.947 | 150                                                   |

\*Equilibrium constants were calculated from the values of the chemical shifts of Thz<sup>4</sup> and Thz<sup>8</sup> protons:  $K = (\delta_s - \delta_{\text{obs}}) / (\delta_{\text{obs}} - \delta_f)$ .  $\delta_s$  (8.09 ppm) is the chemical shift for Thz proton of T3ASC.  $\delta_f$  (7.35 ppm) is chemical shift for Thz proton of *d*ASC at 273 K.

\*\* $\Delta G^\circ = -RT \ln K$

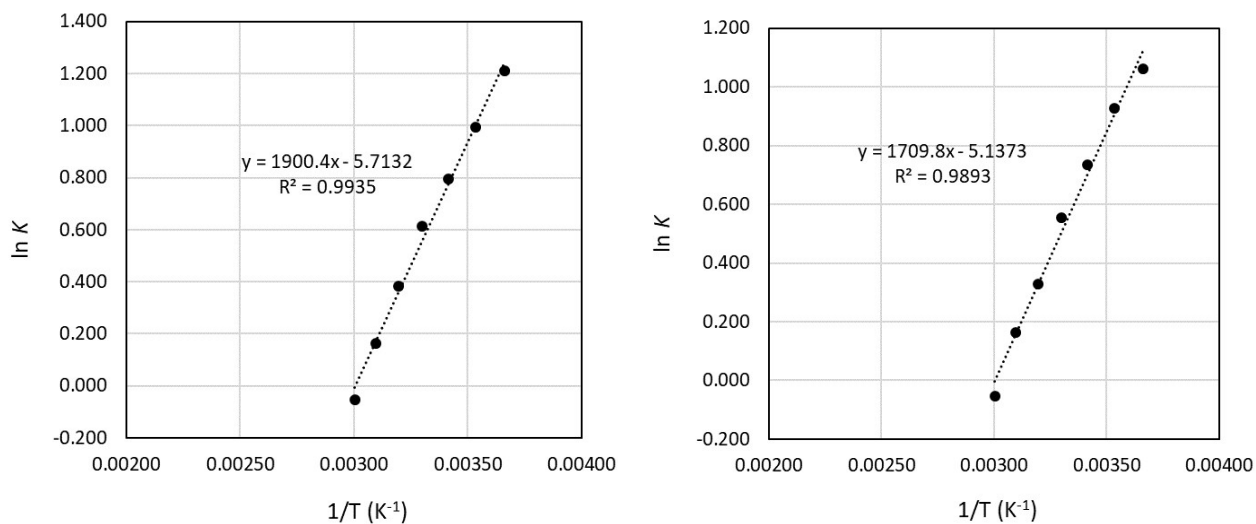

**Fig. S35** van't Hoff plots of peptide 5.

**Table S39.** Thermodynamic parameters of peptide 5.

| $\Delta H^\circ$ ( $\text{kJ}\cdot\text{mol}^{-1}$ ) | $\Delta S^\circ$ ( $\text{J}\cdot\text{mol}^{-1}$ ) | $\Delta G^\circ_{298\text{K}}$ ( $\text{kJ}\cdot\text{mol}^{-1}$ )* | $\Delta H^\circ$ ( $\text{kJ}\cdot\text{mol}^{-1}$ ) | $\Delta S^\circ$ ( $\text{J}\cdot\text{mol}^{-1}$ ) | $\Delta G^\circ_{298\text{K}}$ ( $\text{kJ}\cdot\text{mol}^{-1}$ )* |
|------------------------------------------------------|-----------------------------------------------------|---------------------------------------------------------------------|------------------------------------------------------|-----------------------------------------------------|---------------------------------------------------------------------|
| -15.80                                               | -47.50                                              | -1.64                                                               | -14.22                                               | -42.71                                              | -1.49                                                               |

\* $\Delta G^\circ = \Delta H^\circ - T\Delta S^\circ$

## Thermodynamic parameters and van't Hoff plot of peptide 6

**Table S40.** Equilibrium parameters of peptide 6.

| $T$ (K) | $\delta_{\text{obs}} \text{Thz}^{4,8} \text{H}$ (ppm) | $K^*$ | $\Delta G^\circ$ ( $\text{J}\cdot\text{mol}^{-1}$ )** |
|---------|-------------------------------------------------------|-------|-------------------------------------------------------|
| 273     | 7.52                                                  | 3.353 | -2746                                                 |
| 283     | 7.55                                                  | 2.700 | -2337                                                 |
| 293     | 7.58                                                  | 2.217 | -1940                                                 |
| 303     | 7.62                                                  | 1.741 | -1396                                                 |
| 313     | 7.65                                                  | 1.467 | -997                                                  |
| 323     | 7.69                                                  | 1.176 | -436                                                  |
| 333     | 7.73                                                  | 0.947 | 150                                                   |

\*Equilibrium constants were calculated from the values of the chemical shifts of Thz<sup>4</sup> and Thz<sup>8</sup> protons:  $K = (\delta_s - \delta_{\text{obs}}) / (\delta_{\text{obs}} - \delta_f)$ .  $\delta_s$  (8.09 ppm) is the chemical shift for Thz proton of T3ASC.  $\delta_f$  (7.35 ppm) is chemical shift for Thz proton of *d*ASC at 273 K.

\*\* $\Delta G^\circ = -RT \ln K$

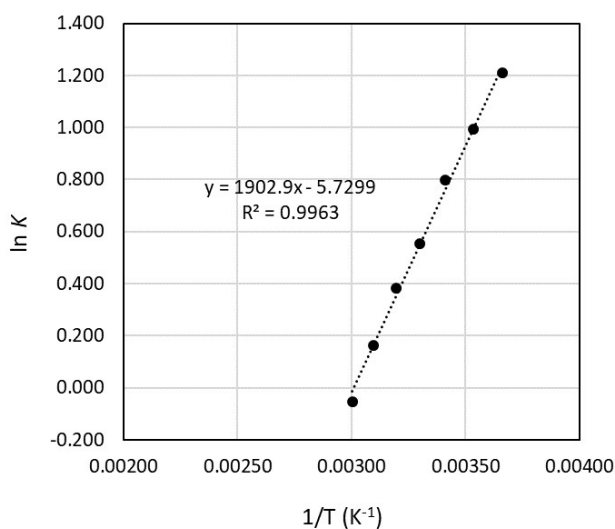

**Fig. S36** van't Hoff plot of peptide 6.

**Table S41.** Thermodynamic parameters of peptide 6.

| $\Delta H^\circ$ ( $\text{kJ}\cdot\text{mol}^{-1}$ ) | $\Delta S^\circ$ ( $\text{J}\cdot\text{mol}^{-1}$ ) | $\Delta G^\circ_{298\text{K}}$ ( $\text{kJ}\cdot\text{mol}^{-1}$ )* |
|------------------------------------------------------|-----------------------------------------------------|---------------------------------------------------------------------|
| -15.8                                                | -47.6                                               | -1.62                                                               |

\* $\Delta G^\circ = \Delta H^\circ - T\Delta S^\circ$



## Thermodynamic parameters and van't Hoff plot of peptide 8

**Table S42.** Equilibrium parameters of peptide 8.

| $T$ (K) | $\delta_{\text{obs}} \text{Thz}^{4,8} \text{H}$ (ppm) | $K^*$ | $\Delta G^\circ$ ( $\text{J}\cdot\text{mol}^{-1}$ )** |
|---------|-------------------------------------------------------|-------|-------------------------------------------------------|
| 273     | 7.61                                                  | 1.846 | -1392                                                 |
| 283     | 7.64                                                  | 1.552 | -1034                                                 |
| 293     | 7.67                                                  | 1.313 | -662                                                  |
| 303     | 7.71                                                  | 1.056 | -136                                                  |
| 313     | 7.74                                                  | 0.897 | 282                                                   |
| 323     | 7.77                                                  | 0.762 | 730                                                   |
| 333     | 7.81                                                  | 0.609 | 1374                                                  |

\*Equilibrium constants were calculated from the values of the chemical shifts of Thz<sup>4</sup> and Thz<sup>8</sup> protons:  $K = (\delta_s - \delta_{\text{obs}}) / (\delta_{\text{obs}} - \delta_f)$ .  $\delta_s$  (8.09 ppm) is the chemical shift for Thz proton of T3ASC.  $\delta_f$  (7.35 ppm) is chemical shift for Thz proton of *d*ASC at 273 K.

\*\* $\Delta G^\circ = -RT \ln K$

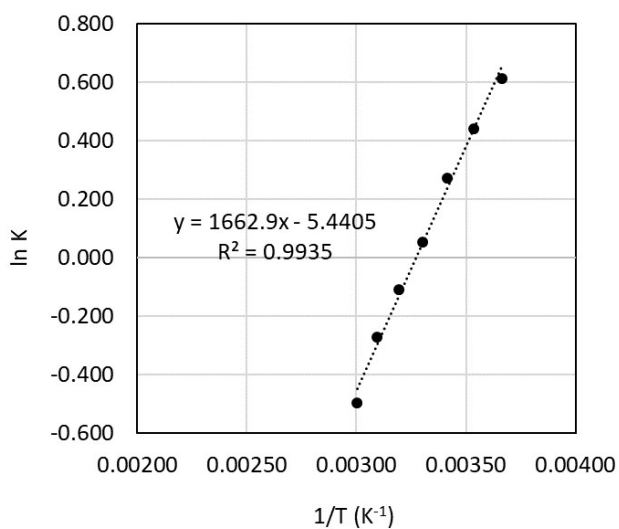

**Fig. S37** van't Hoff plot of peptide 8.

**Table S43.** Thermodynamic parameters of peptide 8.

| $\Delta H^\circ$ ( $\text{kJ}\cdot\text{mol}^{-1}$ ) | $\Delta S^\circ$ ( $\text{J}\cdot\text{mol}^{-1}$ ) | $\Delta G^\circ_{298\text{K}}$ ( $\text{kJ}\cdot\text{mol}^{-1}$ )* |
|------------------------------------------------------|-----------------------------------------------------|---------------------------------------------------------------------|
| -13.83                                               | -45.23                                              | -0.35                                                               |

\* $\Delta G^\circ = \Delta H^\circ - T\Delta S^\circ$

## Thermodynamic parameters and van't Hoff plots of peptide 9

**Table S44.** Equilibrium parameters of peptide 9.

| $T$ (K) | Thz <sup>4or8</sup> H (ppm) | $K^*$ | $\Delta G^{\circ}$ (J $\cdot$ mol <sup>-1</sup> )** | $T$ (K) | Thz <sup>4or8</sup> H (ppm) | $K^{a*}$ | $\Delta G^{\circ}$ (J $\cdot$ mol <sup>-1</sup> )** |
|---------|-----------------------------|-------|-----------------------------------------------------|---------|-----------------------------|----------|-----------------------------------------------------|
| 273     | 7.63                        | 1.643 | -1127                                               | 273     | 7.63                        | 1.643    | -1127                                               |
| 283     | 7.66                        | 1.387 | -770                                                | 283     | 7.66                        | 1.387    | -770                                                |
| 293     | 7.69                        | 1.176 | -396                                                | 293     | 7.70                        | 1.114    | -264                                                |
| 303     | 7.72                        | 1.000 | 0                                                   | 303     | 7.73                        | 0.947    | 136                                                 |
| 313     | 7.75                        | 0.850 | 423                                                 | 313     | 7.76                        | 0.805    | 565                                                 |
| 323     | 7.78                        | 0.721 | 879                                                 | 323     | 7.79                        | 0.682    | 1028                                                |
| 333     | 7.81                        | 0.609 | 1374                                                | 333     | 7.82                        | 0.574    | 1535                                                |

\*Equilibrium constants were calculated from the values of the chemical shifts of Thz<sup>4</sup> and Thz<sup>8</sup> protons:  $K = (\delta_s - \delta_{obs}) / (\delta_{obs} - \delta_f)$ .  $\delta_s$  (8.09 ppm) is the chemical shift for Thz proton of T3ASC.  $\delta_f$  (7.35 ppm) is chemical shift for Thz proton of *d*ASC at 273 K.

\*\* $\Delta G^{\circ} = -RT \ln K$

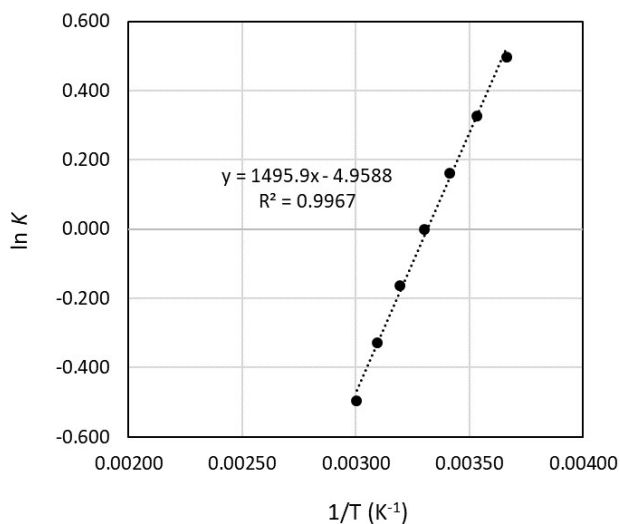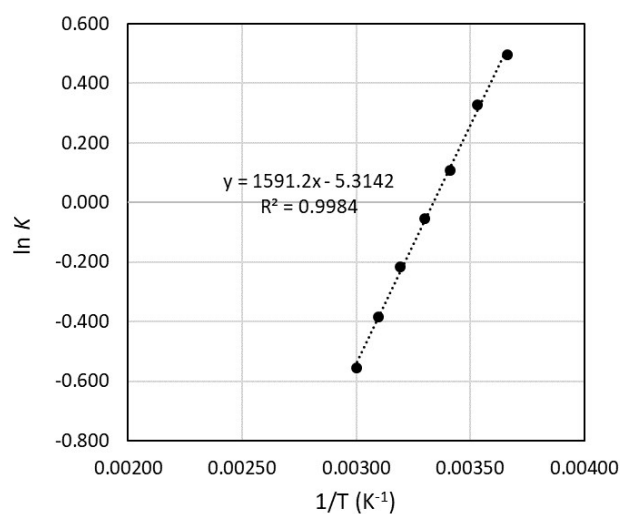

**Fig. S38** van't Hoff plots of peptide **9**.

**Table S45.** Thermodynamic parameters of peptide **9**.

| $\Delta H^\circ$ (kJ·mol <sup>-1</sup> ) | $\Delta S^\circ$ (J·mol <sup>-1</sup> ) | $\Delta G^\circ_{298K}$ (kJ·mol <sup>-1</sup> )* | $\Delta H^\circ$ (kJ·mol <sup>-1</sup> ) | $\Delta S^\circ$ (J·mol <sup>-1</sup> ) | $\Delta G^\circ_{298K}$ (kJ·mol <sup>-1</sup> )* |
|------------------------------------------|-----------------------------------------|--------------------------------------------------|------------------------------------------|-----------------------------------------|--------------------------------------------------|
| -12.44                                   | -41.23                                  | -0.15                                            | -13.23                                   | -44.18                                  | -0.06                                            |

\* $\Delta G^\circ = \Delta H^\circ - T\Delta S^\circ$

## Thermodynamic parameters and van't Hoff plots of peptide 10

**Table S46.** Equilibrium parameters of peptide 10.

| $T$ (K) | Thz <sup>4or8</sup> H (ppm) | $K^*$ | $\Delta G^\circ$ (J·mol <sup>-1</sup> )** | $T$ (K) | Thz <sup>4or8</sup> H (ppm) | $K^*$ | $\Delta G^\circ$ (J·mol <sup>-1</sup> )** |
|---------|-----------------------------|-------|-------------------------------------------|---------|-----------------------------|-------|-------------------------------------------|
| 273     | 7.48                        | 4.692 | -3509                                     | 273     | 7.48                        | 4.692 | -3509                                     |
| 283     | 7.50                        | 3.933 | -3222                                     | 283     | 7.50                        | 3.933 | -3222                                     |
| 293     | 7.52                        | 3.353 | -2947                                     | 293     | 7.52                        | 3.353 | -2947                                     |
| 303     | 7.54                        | 2.895 | -2678                                     | 303     | 7.55                        | 2.700 | -2502                                     |
| 313     | 7.57                        | 2.364 | -2238                                     | 313     | 7.58                        | 2.217 | -2072                                     |
| 323     | 7.60                        | 1.960 | -1807                                     | 323     | 7.61                        | 1.846 | -1646                                     |
| 333     | 7.63                        | 1.643 | -1374                                     | 333     | 7.64                        | 1.552 | -1216                                     |

\*Equilibrium constants were calculated from the values of the chemical shifts of Thz<sup>4</sup> and Thz<sup>8</sup> protons:  $K = (\delta_s - \delta_{obs}) / (\delta_{obs} - \delta_f)$ .  $\delta_s$  (8.09 ppm) is the chemical shift for Thz proton of T3ASC.  $\delta_f$  (7.35 ppm) is chemical shift for Thz proton of *d*ASC at 273 K.

\*\* $\Delta G^\circ = -RT \ln K$

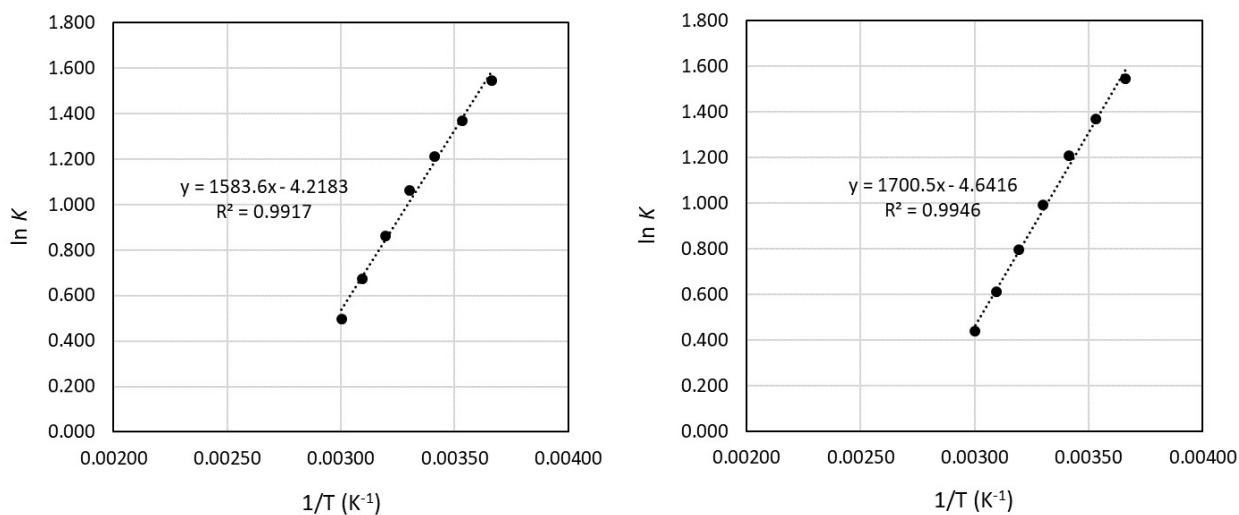

**Fig. S39** van't Hoff plots of peptide 10.

**Table S47.** Thermodynamic parameters of peptide 10.

| $\Delta H^\circ$ (kJ·mol <sup>-1</sup> ) | $\Delta S^\circ$ (J·mol <sup>-1</sup> ) | $\Delta G^\circ_{298K}$ (kJ·mol <sup>-1</sup> )* | $\Delta H^\circ$ (kJ·mol <sup>-1</sup> ) | $\Delta S^\circ$ (J·mol <sup>-1</sup> ) | $\Delta G^\circ_{298K}$ (kJ·mol <sup>-1</sup> )* |
|------------------------------------------|-----------------------------------------|--------------------------------------------------|------------------------------------------|-----------------------------------------|--------------------------------------------------|
| -13.17                                   | -35.07                                  | -2.71                                            | -14.14                                   | -38.59                                  | -2.64                                            |

\* $\Delta G^\circ = \Delta H^\circ - T\Delta S^\circ$

## Thermodynamic parameters and van't Hoff plot of peptide 11

**Table S48.** Equilibrium parameters of peptide 11.

| $T$ (K) | Thz <sup>4,8</sup> H (ppm) | $K^*$ | $\Delta G^\circ$ (J·mol <sup>-1</sup> )** |
|---------|----------------------------|-------|-------------------------------------------|
| 273     | 7.80                       | 0.644 | 997                                       |
| 283     | 7.82                       | 0.574 | 1304                                      |
| 293     | 7.84                       | 0.510 | 1639                                      |
| 303     | 7.87                       | 0.423 | 2167                                      |
| 313     | 7.89                       | 0.370 | 2585                                      |
| 323     | 7.90                       | 0.345 | 2854                                      |
| 333     | 7.92                       | 0.298 | 3350                                      |

\*Equilibrium constants were calculated from the values of the chemical shifts of Thz<sup>4</sup> and Thz<sup>8</sup> protons:  $K = (\delta_s - \delta_{\text{obs}}) / (\delta_{\text{obs}} - \delta_f)$ .  $\delta_s$  (8.09 ppm) is the chemical shift for Thz proton of T3ASC.  $\delta_f$  (7.35 ppm) is chemical shift for Thz proton of *d*ASC at 273 K.

\*\* $\Delta G^\circ = -RT \ln K$

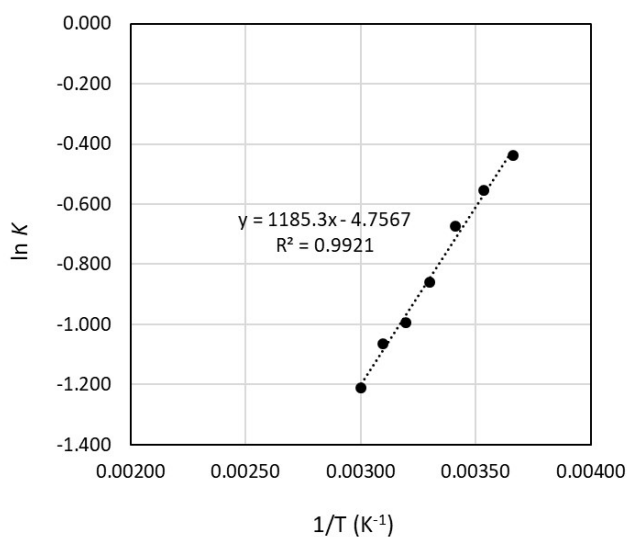

**Fig. S40** van't Hoff plot of peptide 11.

**Table S49.** Thermodynamic parameters of peptide 11.

| $\Delta H^\circ$ (kJ·mol <sup>-1</sup> ) | $\Delta S^\circ$ (J·mol <sup>-1</sup> ) | $\Delta G^\circ_{298K}$ (kJ·mol <sup>-1</sup> )* |
|------------------------------------------|-----------------------------------------|--------------------------------------------------|
| -9.85                                    | -39.55                                  | 1.93                                             |

\* $\Delta G^\circ = \Delta H^\circ - T\Delta S^\circ$

## Thermodynamic parameters of peptide 7

**Table S50.** Equilibrium parameters of peptide 7.

| $T$ (K) | Thz <sup>4,8</sup> H (ppm) | $K^*$ | $\Delta G^\circ$ (J·mol <sup>-1</sup> )** |
|---------|----------------------------|-------|-------------------------------------------|
| 273     | 7.97                       | 0.194 | 3727                                      |
| 283     | 7.98                       | 0.175 | 4106                                      |
| 293     | 7.98                       | 0.175 | 4251                                      |
| 298     | 7.98                       | 0.175 | 4324                                      |
| 303     | 7.98                       | 0.175 | 4397                                      |
| 313     | 7.99                       | 0.156 | 4831                                      |
| 323     | 7.99                       | 0.156 | 4985                                      |
| 333     | 7.99                       | 0.156 | 5139                                      |

\*Equilibrium constants were calculated from the values of the chemical shifts of Thz<sup>4</sup> and Thz<sup>8</sup> protons:  $K = (\delta_s - \delta_{\text{obs}}) / (\delta_{\text{obs}} - \delta_f)$ .  $\delta_s$  (8.09 ppm) is the chemical shift for Thz proton of T3ASC.  $\delta_f$  (7.35 ppm) is chemical shift for Thz proton of *d*ASC at 273 K.

\*\* $\Delta G^\circ = -RT \ln K$

## Thermodynamic parameters of peptide 12

**Table S51.** Equilibrium parameters of peptide 12.

| $T$ (K) | Thz <sup>4or8</sup> H (ppm) | $K^*$ | $\Delta G^\circ$ (J·mol <sup>-1</sup> )** | $T$ (K) | Thz <sup>4or8</sup> H (ppm) | $K^*$ | $\Delta G^\circ$ (J·mol <sup>-1</sup> )** |
|---------|-----------------------------|-------|-------------------------------------------|---------|-----------------------------|-------|-------------------------------------------|
| 273     | 7.99                        | 0.156 | 4213                                      | 273     | 8.01                        | 0.121 | 4790                                      |
| 283     | 8.00                        | 0.138 | 4652                                      | 283     | 8.01                        | 0.121 | 4965                                      |
| 293     | 8.00                        | 0.138 | 4816                                      | 293     | 8.01                        | 0.121 | 5140                                      |
| 298     | 8.00                        | 0.138 | 4907                                      | 303     | 8.01                        | 0.121 | 5316                                      |
| 303     | 8.00                        | 0.138 | 4981                                      | 313     | 8.01                        | 0.121 | 5491                                      |
| 313     | 8.00                        | 0.138 | 5145                                      | 323     | 8.01                        | 0.121 | 5667                                      |
| 323     | 8.00                        | 0.138 | 5310                                      | 333     | 8.02                        | 0.104 | 6254                                      |
| 333     | 8.00                        | 0.138 | 5474                                      |         |                             |       |                                           |

\*Equilibrium constants were calculated from the values of the chemical shifts of Thz<sup>4</sup> and Thz<sup>8</sup> protons:  $K = (\delta_s - \delta_{\text{obs}}) / (\delta_{\text{obs}} - \delta_f)$ .  $\delta_s$  (8.09 ppm) is the chemical shift for Thz proton of T3ASC.  $\delta_f$  (7.35 ppm) is chemical shift for Thz proton of *d*ASC at 273 K.

\*\* $\Delta G^\circ = -RT \ln K$

## CD spectral changes by TFE titration for 2-7

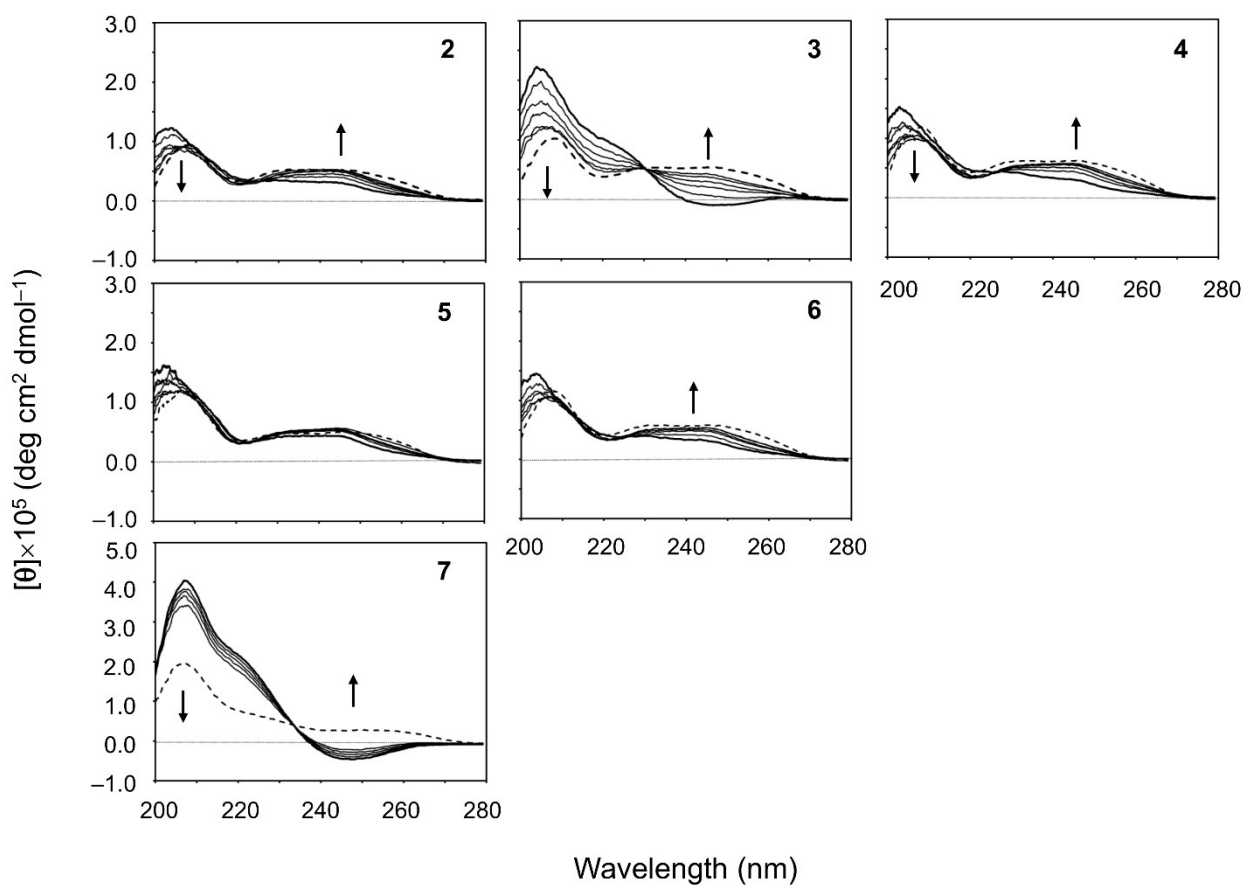

**Fig. S41** CD spectral changes elicited by titration of TFE for peptides **2-7**. The spectra were measured in CH<sub>3</sub>CN solution while changing the TFE concentration (10%, 20%, 30%, 40%, 50% and 100%). The spectra in 100% CH<sub>3</sub>CN and 100% TFE solution are drawn in bold and dashed lines, respectively. The spectra for **2-5** are taken from previous report (A. Asano *et. al.*, *J. Peptide Res.*, 2002, **60**, 10-22). The spectra for **6** is taken from previous report (A. Asano *et. al.*, *Acta Cryst.*, 2003, **C59**, o488-o490). The spectra for **7** is taken from previous report (A. Asano *et. al.*, *Bioorg. Med. Chem.*, 2011, **19**, 3372-3377).

## CD spectral changes by increasing temperature for 2-7

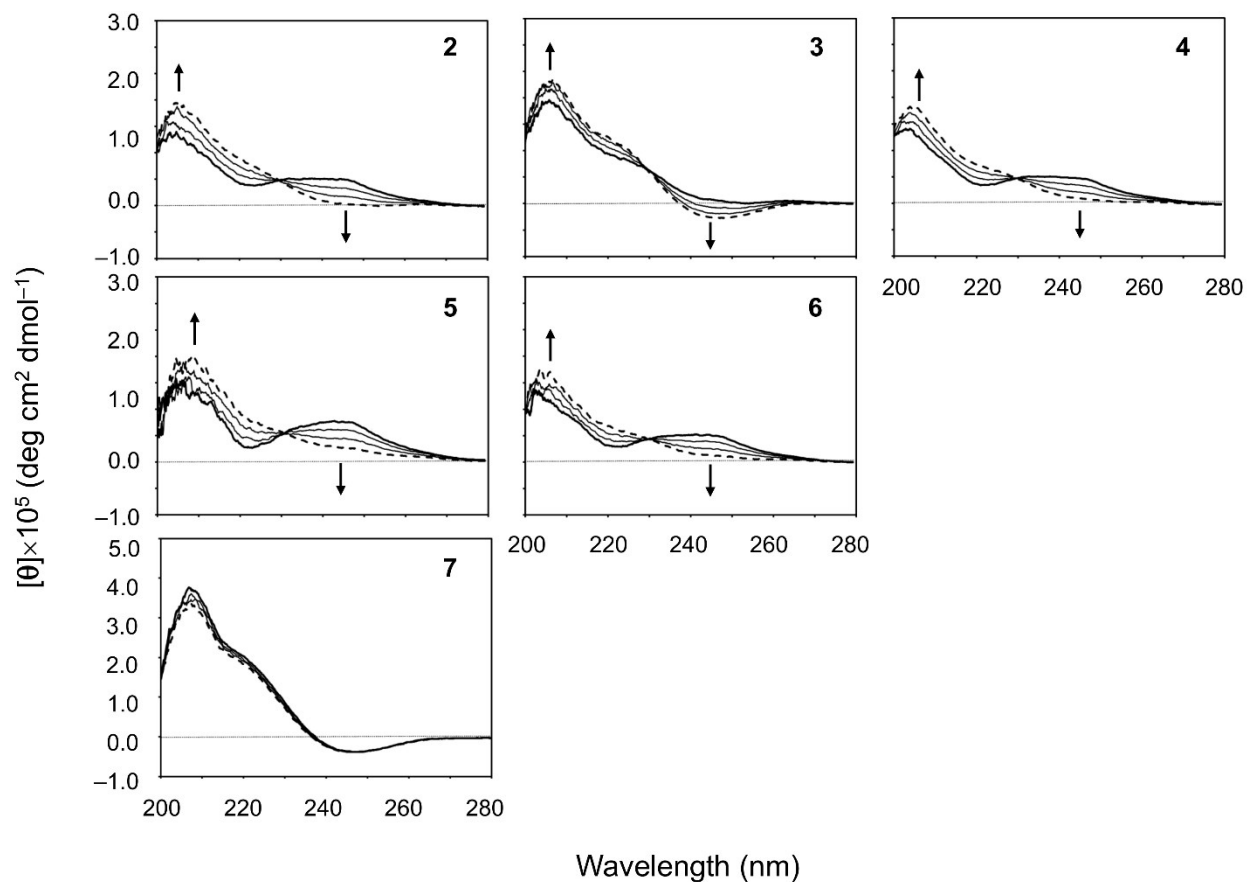

**Fig. S42** Temperature dependence of the CD spectra for peptides **2-7**. The spectra were measured every 20 K in CH<sub>3</sub>CN solution at 273-333 K. The CD spectra at 273 and 333 K are drawn in bold and dashed lines, respectively. The spectra for **7** is taken from previous report (A. Asano *et. al.*, *Bioorg. Med. Chem.*, 2011, **19**, 3372-3377).



## Superimposition of the X-ray structures of **1** and T3ASC

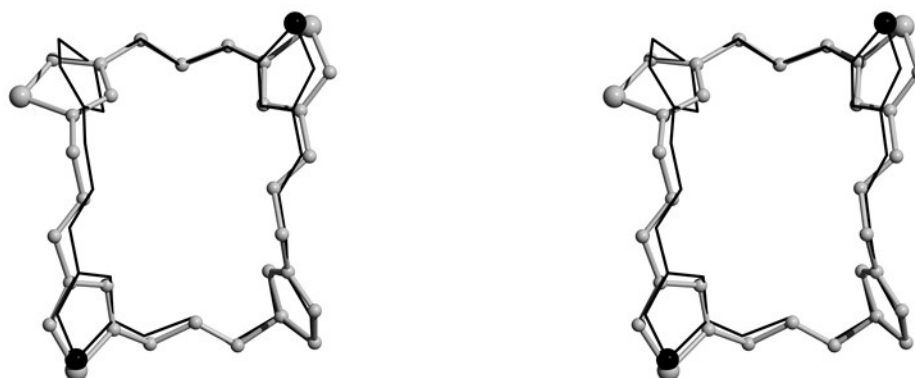

**Fig. S43** Superimpositions of the crystal structures peptide **1** and T3ASC. Side chains and hydrogen atoms are omitted for clarity. Thin lines (black) represent the peptide ring of peptide **1**, and the sulfur atoms are represented by balls. This figure is taken from previous report (A. Asano *et. al.*, *J. Pept. Sci.*, 2018, e3120).

## The X-ray structure of *d*ASC

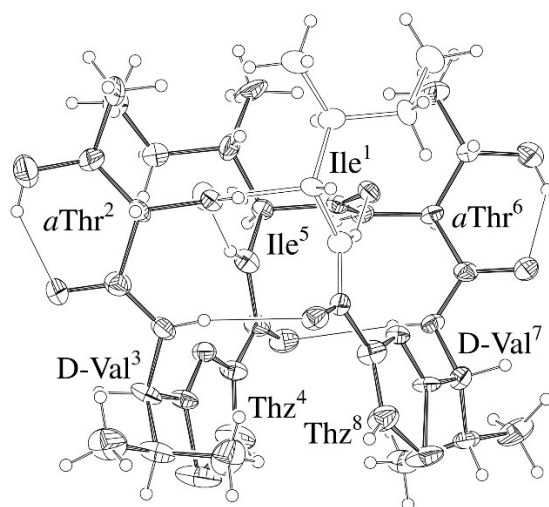

**Fig. S44** The crystal structure of *d*ASC. Thin lines represent hydrogen bonds. This figure is taken from previous report (A. Asano *et. al.*, *Biopolymers* 2001, **58**, 295-304).
